# Supplementary material for: Integrated Expression Analysis of Small RNA, Degradome and Microarray Reveals Complex Regulatory Action of miRNA during Prolonged Shade in Swarnaprabha Rice
Source: Biology (Basel). 2022 May 23;11(5):798. doi: 10.3390/biology11050798 (PMC9138629; doi:10.3390/biology11050798)
Supplement: Supplementary file 1 [file biology-11-00798-s001.zip]

Archive with 7 entries (7 files):
- Figure S1.tif
- Figure S2.tif
- Figure S3.tif
- Figure S4.tif
- Figure S5.tif
- Legends-Supplemenatry Figures.pdf
- Supplementary Tables.xlsx
