# Supplementary material for: Integrated Expression Analysis of Small RNA, Degradome and Microarray Reveals Complex Regulatory Action of miRNA during Prolonged Shade in Swarnaprabha Rice
Source: Biology (Basel). 2022 May 23;11(5):798. doi: 10.3390/biology11050798 (PMC9138629; doi:10.3390/biology11050798)
Supplement: Supplementary file 1 [file biology-11-00798-s001.zip › Supplementary Tables.xlsx]

## Sheet: Index
		Supplementary Table S1-S18. Assorted Data of Details of candidates of miRNA sequencing, Degradome sequencing and Microarray done with Panicle samples of Swarnaprabha rice after 20 days of shade.
		INDEX of Supplementary Tables
		Table Number	Content
		Supplementary Table S1	Read Statistics obtained from small RNA sequencing of panicle samples of Swarnaprabha rice grown under Sun or prolonger shade condition
		Supplementary Table S2	List of known miRNA obtained from SP rice panicles grown under sun or shade treatment
		Supplementary Table S3	Major criteria using Bowtie and Mireap_0.22b for novel miRNA prediction
		Supplementary Table S4	List of novel miRNA obtained from SP rice panicles grown under sun or shade treatment
		Supplementary Table S5	Similarity of Rice MIRs found orthologous with other species based on the sequences aligned
		Supplementary Table S6	List of MIR families and the miRNA categorized into them.
		Supplementary Table S7A	List of Differentially Expressed known miRNA in SP grown under Sun and Shade condition
		Supplementary Table S7B	List of Differentially Expressed novel miRNA in SP grown under Sun and Shade condition
		Supplementary Table S8A	List of known miRNA expressed uniquely under sun in Swarnaprabha Panicles
		Supplementary Table S8B	List of known miRNA expressed uniquely under shade in Swarnaprabha Panicles
		Supplementary Table S8C	List of Novel miRNA expressed uniquely under sun in Swarnaprabha Panicles
		Supplementary Table S8D	List of Novel miRNA expressed uniquely under shade in Swarnaprabha Panicles
		Supplementary Table S9	List of Neutrally Regulated known miRNA in SP grown under Sun and Shade condition
		Supplementary Table S10A	Total read statistics of Degradome Sequencing
		Supplementary Table S10B	Number of Sites Identified for miRNA mediated Cleavage
		Supplementary Table S10C	Number of Targets predicted or obtained from the small RNA and Degradome sequencing respectively
		Supplementary Table S11	Degradome Target details targeted by Differentially Expressed miRNAs.
		Supplementary Table S12	Pathway Categorization of degradedTargets of Up-regulated DEm
		Supplementary Table S13	Pathway Categorization of degraded Targets of Down-regulated DEm
		Supplementary Table S14A	Details of the Targets of Down-DEm.
		Supplementary Table S14B	Details of the Targets of Up-DEm.
		Supplementary Table S15A	Regulation by uniquely expressed miRNA under shade
		Supplementary Table S15B	Regulation by uniquely expressed miRNA in sun
		Supplementary Table S15C	Regulation by neutrally-regulated miRNA
		Supplementary Table S16A	Details of transcripts previously identified to be involved in shade tolerance and targeted by Differentially Expressed miRNAs
		Supplementary Table S16B	Details of transcripts light signaling involved in shade tolerance and targeted by Differentially Expressed miRNAs
		Supplementary Table S16C	miRNAs known to be involved in abiotic stress, light signalling, yield and their targets identifed using microarray expression analysis
		Supplementary Table S17A	Details of Transcripts Targeted by Novel miRNAs uniquely found under Sun.
		Supplementary Table S17B	Details of Transcripts Targeted by Novel miRNAs uniquely found under Shade.
		Supplementary Table S18	Primer sequences used for qPCR

## Sheet: Table S1
Supplementary Table S1. Read Statistics obtained from small RNA sequencing of panicle samples of Swarnaprabha rice grown under Sun or prolonger shade condition. Average of two biological replicates each from sun and shade treatment were presented.
	Sun	Shade
Total Reads	1.51898e+07	1.38888e+07
Trimmed Unique Reads	1.85034e+06	1.71367e+06
Reads aligned to genome	1602778	1511983
% reads aligned to genome	86.46	88.09
rRNA	5359.5	5177
snoRNA	27.5	26
snRNA	20.5	27.5
tRNA	1	5
Clustered Reads	1.08127e+06	1.00086e+06
Reads aligned to mirBase	16885.5	15204.5
Known miRNA Uniq	316	308
Reads used for Novel miRNA	1064382	985653
Reads utilized for Novel miRNA	23144.5	25059.5
Novel miRNA predicted	14.5	14
Putative miRNAs	1.04124e+06	960594

## Sheet: Table S2
Supplementary Table S2. List of known miRNA obtained from SP rice panicles grown under sun or shade treatment
miRNA Name	pre_miRNA seq	pre_miR Len	seq aligned to miRBase	Alignment Len	Read Count	% identity	E Value	Description	MIR Family
osa-miR11336-3p	GAGAGAATATGGGCAATGCTAGAAAGTCTGCC	32	GAATATGGGCAATGCTAGAAAGTCT	25	10	96	4e-08	MIMAT0044627 Oryza sativa miR11336-3p	NA
osa-miR11336-5p	CACCGAATGTGGGCAATGCTAGAAAGTCGCCC	32	GAATGTGGGCAATGCTAGAAAGTC	24	17	95.83	2e-07	MIMAT0044626 Oryza sativa miR11336-5p	NA
osa-miR11337-3p	TACGATATCTCGTTAGATTCGTCTCGTACTAC	32	TATCTCGTTAGATTCGTCTCG	21	5	100	4e-08	MIMAT0044629 Oryza sativa miR11337-3p	NA
osa-miR11337-5p	CTGCGAGACGAATCTAACGAGGTATATTCGTG	32	TGCGAGACGAATCTAACGAGG	21	1	100	4e-08	MIMAT0044628 Oryza sativa miR11337-5p
osa-miR11338-5p	GCATATTTTGCGAGACGAATCTAATGATCGCA	32	TTTGCGAGACGAATCTAATGAT	24	3	95.45	2e-06	MIMAT0044630 Oryza sativa miR11338-5p	NA
osa-miR11339-3p	CCATATGAATGTGGGAAATGCTAGAATGCGAC	32	TATGAATGTGGGAAATGCTAG	21	13	95.24	1e-05	MIMAT0044633 Oryza sativa miR11339-3p	NA
osa-miR11339-5p	ACTCTCTATATGAATGTGGGCAATGCCTC	29	CTATATGAATGTGGGCAATGC	21	6	100	3e-08	MIMAT0044632 Oryza sativa miR11339-5p	NA
osa-miR11340-3p	AAATAGTGTAATCGGATTGTAGATCGGACACC	32	AATAGTGTAATCGGATTGTAGATC	24	4	95.83	2e-07	MIMAT0044635 Oryza sativa miR11340-3p	NA
osa-miR11340-5p	GACCGTGTAATCAGATCGTAGATCGGATGCAC	32	GTGTAATCAGATCGTAGATCGGAT	24	11	95.83	2e-07	MIMAT0044634 Oryza sativa miR11340-5p	NA
osa-miR11341-5p	GCAGATTCGTCTCGCAAAATAGCCTAGGCTCC	32	ATTCGTCTCGCAAAATAGCCTAGG	24	4	100	6e-10	MIMAT0044636 Oryza sativa miR11341-5p	NA
osa-miR11342-3p	CGACATTTGCGGGACGAATCTAACGAGTCGCG	32	TTTGCGGGACGAATCTAACGAG	22	7	95.45	2e-06	MIMAT0044639 Oryza sativa miR11342-3p	NA
osa-miR11343-3p	GCCCATGAATGTGGGCAACGTTAAAAAAGCCC	32	TGAATGTGGGCAACGTTAAAA	21	6	95.24	1e-05	MIMAT0044641 Oryza sativa miR11343-3p	NA
osa-miR11343-5p	GTGCAATGTGGGCAAAGCTAGAAAGACTGCCC	32	AATGTGGGCAAAGCTAGAAAG	21	5	95.24	1e-05	MIMAT0044640 Oryza sativa miR11343-5p	NA
osa-miR11344-5p	ACGCATCTCGAGATATCGGTACCTCATGCACA	32	ATCTCGAGATATCGGTACCTC	22	6	100	4e-08	MIMAT0044642 Oryza sativa miR11344-5p	NA
osa-miR1319a	CCGGATAATATATTATAGATGCCGGGTTAAGCC	33	ATAATATATTATAGATGCCGG	24	5	95.24	1e-05	MIMAT0009136 Oryza sativa miR1319a	MIR1319
osa-miR1319b	CATTATAATATATTATAGGTATCGGTTAGGCC	32	TAATATATTATAGGTATCGG	24	9	95	4e-05	MIMAT0023298 Oryza sativa miR1319b	MIR1319
osa-miR1320-3p	AAATGTAAAATTCATTCGTTCCAATTTAC	29	TGTAAAATTCATTCGTTCCAA	21	4	100	3e-08	MIMAT0015286 Oryza sativa miR1320-3p	NA
osa-miR1320-5p	ACTTGGAACGGAGGAATTTTATAGGTCTC	29	TGGAACGGAGGAATTTTATAG	21	7	100	3e-08	MIMAT0009137 Oryza sativa miR1320-5p	NA
osa-miR1423-3p	GGTTAGCGCCCGAGCGGTAGTTGTCTCCGCGT	32	AGCGCCCGAGCGGTAGTTGTC	21	10	95.24	1e-05	MIMAT0005957 Oryza sativa miR1423-3p	NA
osa-miR1423-5p	CAGCAGGCAACTACACGTTGGGCGCTCGATGCC	33	AGGCAACTACACGTTGGGCGCTCG	24	10	100	7e-10	MIMAT0015244 Oryza sativa miR1423-5p	NA
osa-miR1425-3p	CAGTCAGCAAGAACTGGATCTTAATGCTG	29	CAGCAAGAACTGGATCTTAAT	21	9	100	3e-08	MIMAT0020933 Oryza sativa miR1425-3p	NA
osa-miR1425-5p	ACGCTAGGATTCAATCCTTGCTGCTCCTT	29	TAGGATTCAATCCTTGCTGCT	21	7	100	3e-08	MIMAT0005959 Oryza sativa miR1425-5p	NA
osa-miR1428e-3p	ATGGTAAGATAATGCCATGAATTTGGCTC	29	TAAGATAATGCCATGAATTTG	21	3	100	3e-08	MIMAT0007785 Oryza sativa miR1428e-3p	MIR1428
osa-miR1428f-5p	CTATACAAGATAGGGCCTGTGAATTCGCGCAC	32	ACAAGATAGGGCCTGTGAATT	22	4	100	4e-08	MIMAT0010043 Oryza sativa miR1428f-5p	MIR1428
osa-miR1429-3p	CATCGTTGCACGGGTTTGTATGTTGCAGACCC	32	GTTGCACGGGTTTGTATGTTG	21	2	100	4e-08	MIMAT0005963 Oryza sativa miR1429-3p	NA
osa-miR1429-5p	GCGGGTAATATACTAATCCGTGCATCCAGGGC	32	GTAATATACTAATCCGTGCAT	21	3	100	4e-08	MIMAT0009208 Oryza sativa miR1429-5p	NA
osa-miR1431	AAATTTTGCGAGTTGGCCCGCTTGCTAAG	29	TTTGCGAGTTGGCCCGCTTGC	21	1	100	3e-08	MIMAT0005965 Oryza sativa miR1431	NA
osa-miR1432-5p	AAGTATCAGGAGAGATGACACCGACATCTC	30	ATCAGGAGAGATGACACCGAC	21	9	100	4e-08	MIMAT0005966 Oryza sativa miR1432-5p	NA
osa-miR1436	CCACATTTTGGGACGGAGGGAGTACACACTCC	32	ACATTTTGGGACGGAGGGAGT	21	9	95.24	1e-05	MIMAT0005987 Oryza sativa miR1436	MIR818
osa-miR1437b-3p	GAGTGCGGCACCGGAGCTCGCCAGCACGCTTC	32	TGCGGCACCGGAGCTCGCCAGCAC	24	3	100	6e-10	MIMAT0029954 Oryza sativa miR1437b-3p	MIR1437
osa-miR1437b-5p	GAAACGCACTAGGCACTGTTTCCTCGTAG	29	CACTAGGCACTGTTTCCTC	21	6	100	5e-07	MIMAT0029953 Oryza sativa miR1437b-5p	MIR1437
osa-miR1439	CACATATTTTGGAACAGAGTGAGTATTCC	29	TTTTGGAACAGAGTGAGTATT	21	7	95.24	8e-06	MIMAT0005993 Oryza sativa miR1439	MIR818
osa-miR1440a	CACTTTTGGGAGAGTGGCATTTGAGCACCCCC	32	GGAGAGTGGCATTTGAGCA	20	7	94.74	0.0002	MIMAT0005990 Oryza sativa miR1440a	MIR1440
osa-miR1440b	ACTCAAAATTTAGGAGAGTGGTATTTGAAATATC	34	TTTAGGAGAGTGGTATTTGA	21	5	100	2e-07	MIMAT0024866 Oryza sativa miR1440b	MIR1440
osa-miR1441	CCTACCGGATGTCGGAAAGGGTTTTCGCCTC	31	ACCGGATGTCGGAAAGGGTTT	21	11	95.24	9e-06	MIMAT0005991 Oryza sativa miR1441	NA
osa-miR1442	GCCGGACACATCTAGTACTATGAATATAGTCG	32	ACACATCTAGTACTATGAAT	20	8	100	2e-07	MIMAT0005992 Oryza sativa miR1442	MIR818
osa-miR156f-3p	CGCAGCTCACTGCTCTTTCTGTCATCCTCC	30	GCTCACTGCTCTTTCTGTCA	22	3	95	4e-05	MIMAT0022847 Oryza sativa miR156f-3p	MIR156
osa-miR156i	TTCTTTGACAGAAGAGAGTGAGCACTCCTC	30	TGACAGAAGAGAGTGAGCAC	20	99	100	1e-07	MIMAT0000626 Oryza sativa miR156i	MIR156
osa-miR156j-3p	CAAATGCTCGCTCCTCTTTCTGTCAGCCTTA	31	GCTCGCTCCTCTTTCTGTCAGC	22	7	100	1e-08	MIMAT0022850 Oryza sativa miR156j-3p	MIR156
osa-miR156k	GCAATTGACAGAAGATAGAGAGCACTGTGG	30	TGACAGAAGATAGAGAGCAC	21	5	95	4e-05	MIMAT0001020 Oryza sativa miR156k	MIR156
osa-miR156l-5p	TCGCTTGACAGAAGAGAGTGAGCATTGCAT	30	GACAGAAGAGAGTGAGCAT	21	7	100	6e-07	MIMAT0001021 Oryza sativa miR156l-5p	MIR156
osa-miR159a.1	CAAATTTGGATTGAAGGGAGCTCTGCTCCCC	31	TTTGGATTGAAGGGAGCTCTG	21	66	100	4e-08	MIMAT0001022 Oryza sativa miR159a.1	MIR159
osa-miR159a.2	AACGCTTGCATGCCCCAGGAGCTGCAGAT	29	TTGCATGCCCCAGGAGCTGCA	21	10	100	3e-08	MIMAT0009200 Oryza sativa miR159a.2	MIR159
osa-miR159c	TAATATTGGATTGAAGGGAGCTCCCCCT	28	ATTGGATTGAAGGGAGCTCC	21	6	100	1e-07	MIMAT0001024 Oryza sativa miR159c	MIR159
osa-miR159e	AAGGTTTGGATTGAAGGGAGCTCCTTC	27	TTGGATTGAAGGGAGCTCCT	21	1	100	1e-07	MIMAT0001026 Oryza sativa miR159e	MIR159
osa-miR159f	AGTCTTGGATTGAAGGGAGCTCTGCACCCC	30	CTTGGATTGAAGGGAGCTCT	21	17	100	1e-07	MIMAT0001027 Oryza sativa miR159f	MIR159
osa-miR160b-3p	GCCTGCGTGCAAGGAGCCAAGCATGGCTC	29	GCGTGCAAGGAGCCAAGCATG	21	5	100	3e-08	MIMAT0022852 Oryza sativa miR160b-3p	MIR160
osa-miR160d-5p	AGCTTGCCTGGCTCCCTGTATGCCACGGC	29	TGCCTGGCTCCCTGTATGCCA	21	12	100	3e-08	MIMAT0000631 Oryza sativa miR160d-5p	MIR160
osa-miR160e-5p	GCGTTGCCTGGCTCCCTGTATGCCGTCTC	29	TGCCTGGCTCCCTGTATGCCG	21	9	100	3e-08	MIMAT0001030 Oryza sativa miR160e-5p	MIR160
osa-miR160f-3p	ATAAGCATTGAGGGAGTCATGCAGGGTGAC	30	GCATTGAGGGAGTCATGCAGG	21	7	100	4e-08	MIMAT0022868 Oryza sativa miR160f-3p	MIR160
osa-miR160f-5p	CAACTGCCTGGCTCCCTGAATGCCACGGC	29	TGCCTGGCTCCCTGAATGCCA	21	24	100	3e-08	MIMAT0001031 Oryza sativa miR160f-5p	MIR160
osa-miR162a	TGTATCGATAAACCTCTGCATCCAGGGGG	29	TCGATAAACCTCTGCATCCAG	21	13	100	3e-08	MIMAT0000632 Oryza sativa miR162a	MIR162_2
osa-miR162b	ATAATCGATAAGACTCTGCATCCAGGCTA	29	TCGATAAGACTCTGCATCCAG	21	12	95.24	8e-06	MIMAT0001032 Oryza sativa miR162b	MIR162_2
osa-miR164b	TTCTTGGAGAAGCAGGGCACGTGCACTCC	29	TGGAGAAGCAGGGCACGTGCA	21	62	100	3e-08	MIMAT0000634 Oryza sativa miR164b	MIR164
osa-miR164c	CATATGGAGAAGCAGGGTACGTGCACTCC	29	TGGAGAAGCAGGGTACGTGCA	21	8	100	3e-08	MIMAT0001033 Oryza sativa miR164c	MIR164
osa-miR164d	AAACTGGAGAAGCAGGGCACGTGCTCTCC	29	TGGAGAAGCAGGGCACGTGCT	21	19	100	3e-08	MIMAT0001034 Oryza sativa miR164d	MIR164
osa-miR164e	TGCTTGGAGAAGCAGGGCACGTGAACTCC	29	TGGAGAAGCAGGGCACGTGA	21	15	100	1e-07	MIMAT0001035 Oryza sativa miR164e	MIR164
osa-miR166a-3p	TACCTCGGACCAGGCTTCATTCCCCTTGCCC	31	TCGGACCAGGCTTCATTCCCC	21	16	100	4e-08	MIMAT0000635 Oryza sativa miR166a-3p	MIR166
osa-miR166b-5p	AAATGGAATGTTGTCTGGCTCGGGGTTCC	29	GGAATGTTGTCTGGCTCGGGG	21	10	100	3e-08	MIMAT0022856 Oryza sativa miR166b-5p	MIR166
osa-miR166c-5p	AACAGGAATGTTGTCTGGTCCGAGACTCC	29	GGAATGTTGTCTGGTCCGAG	20	9	100	1e-07	MIMAT0022857 Oryza sativa miR166c-5p	MIR166
osa-miR166d-5p	GCCTGGAATGTTGTCTGGCTCGAGGATCC	29	GGAATGTTGTCTGGCTCGAGG	21	9	100	3e-08	MIMAT0022858 Oryza sativa miR166d-5p	MIR166
osa-miR166e-3p	CCTATCGAACCAGGCTTCATTCCTCCGTC	29	TCGAACCAGGCTTCATTCC	21	3	100	5e-07	MIMAT0000639 Oryza sativa miR166e-3p	MIR166
osa-miR166e-5p	AATCGGAATGTTGTCTGGTTCAAGGTCTCATACCCC	36	GGAATGTTGTCTGGTTCAAGG	21	9	100	4e-08	MIMAT0022859 Oryza sativa miR166e-5p	MIR166
osa-miR166g-3p	CATTTCGGACCAGGCTTCATTCCTCGTCC	29	TCGGACCAGGCTTCATTCCTC	21	16	100	3e-08	MIMAT0001072 Oryza sativa miR166g-3p	MIR166
osa-miR166h-5p	ATATGGAATGTTGGCTGGCTCGAGGTCCC	29	GGAATGTTGGCTGGCTCGAGG	21	8	100	3e-08	MIMAT0022882 Oryza sativa miR166h-5p	MIR166
osa-miR166i-3p	GCAGTCTCGGATCAGGCTTCATTCCTGAG	29	TCGGATCAGGCTTCATTCCT	21	2	100	1e-07	MIMAT0001074 Oryza sativa miR166i-3p	MIR166
osa-miR166i-5p	ATGCAATGCAGTTTGATCCAAGATCCTGC	29	AATGCAGTTTGATCCAAGATC	21	3	100	3e-08	MIMAT0022883 Oryza sativa miR166i-5p	MIR166
osa-miR166j-5p	TTCTGAATGACGTCCGGTCTGAAGACCGG	29	GAATGACGTCCGGTCTGAAGA	21	5	100	3e-08	MIMAT0022887 Oryza sativa miR166j-5p	MIR166
osa-miR166k-5p	CCAGGGTTTGTTGTCTGGCTCGAGGCACT	29	GGTTTGTTGTCTGGCTCGAGG	21	5	100	3e-08	MIMAT0022870 Oryza sativa miR166k-5p	MIR166
osa-miR166l-3p	TAAGTCGGACCAGGCTTCAATCCCTGTCC	29	TCGGACCAGGCTTCAATCCCT	21	30	100	3e-08	MIMAT0001038 Oryza sativa miR166l-3p	MIR166
osa-miR166l-5p	CAGAGGATTGTTGTCTGGTTCAAGGATCC	29	GGATTGTTGTCTGGTTCAAGG	21	5	100	3e-08	MIMAT0022871 Oryza sativa miR166l-5p	MIR166
osa-miR166m	TCATTTCGGACCAGGCTTCATTCCCTGAC	29	TCGGACCAGGCTTCATTCCCT	21	13	100	3e-08	MIMAT0001087 Oryza sativa miR166m	MIR166
osa-miR167a-3p	ATAGATCATGCATGACAGCCTCATTGTTC	29	ATCATGCATGACAGCCTCATT	22	6	100	3e-08	MIMAT0006780 Oryza sativa miR167a-3p	MIR167_1
osa-miR167a-5p	ATGGTGAAGCTGCCAGCATGATCTACCCC	29	TGAAGCTGCCAGCATGATCTA	21	36	100	3e-08	MIMAT0000641 Oryza sativa miR167a-5p	MIR167_1
osa-miR167d-3p	ACAAAGATCGTGCTGCGCAGTTTCATCGACC	31	GATCGTGCTGCGCAGTTTCATC	22	7	90.91	0.0006	MIMAT0022872 Oryza sativa miR167d-3p	MIR167_1
osa-miR167e-3p	CACTAGATCATGTTGCAGCTTCACTGCTC	29	AGATCATGTTGCAGCTTCACT	21	8	100	3e-08	MIMAT0022873 Oryza sativa miR167e-3p	MIR167_1
osa-miR167f	CTGCTGAAGCTGCCAGCATGATCTGACCCC	30	TGAAGCTGCCAGCATGATCTG	21	79	100	4e-08	MIMAT0001041 Oryza sativa miR167f	MIR167_1
osa-miR167h-3p	AATCAGGTCATGCTGTAGTTTCATCTTTC	29	AGGTCATGCTGTAGTTTCATC	21	13	100	3e-08	MIMAT0022874 Oryza sativa miR167h-3p	MIR167_1
osa-miR168a-3p	ACAGGATCCCGCCTTGCACCAAGTGAATGATC	32	GATCCCGCCTTGCACCAAGTGAAT	24	7	100	6e-10	MIMAT0015122 Oryza sativa miR168a-3p	MIR168
osa-miR168a-5p	CCCGTCGCTTGGTGCAGATCGGGACATCC	29	TCGCTTGGTGCAGATCGGGAC	21	37	100	3e-08	MIMAT0001045 Oryza sativa miR168a-5p	MIR168
osa-miR168b	AATTTCGCTTGGTGCAGCTCGGGACATCC	29	GCTTGGTGCAGCTCGGGA	21	7	100	2e-06	MIMAT0001046 Oryza sativa miR168b	NA
osa-miR169a	AATACAGCCAAGGATGACTTGCCGAGCTG	29	CAGCCAAGGATGACTTGCCGA	21	5	100	3e-08	MIMAT0000644 Oryza sativa miR169a	MIR169_2
osa-miR169b	CACGCAGCCAAGGATGACTTGCCGGGTAC	29	CAGCCAAGGATGACTTGCCGG	21	6	100	3e-08	MIMAT0001047 Oryza sativa miR169b	MIR169_2
osa-miR169d	CAGTTAGCCAAGGATGAATTGCCGTTGAAT	30	TAGCCAAGGATGAATTGCCG	21	6	100	1e-07	MIMAT0001049 Oryza sativa miR169d	MIR169_1
osa-miR169f.2	CTATTGAGGACAAGAGCTGATTCGGTCC	28	TGAGGACAAGAGCTGATTCGG	21	5	100	3e-08	MIMAT0020916 Oryza sativa miR169f.2	MIR169_1
osa-miR169i-5p.2	GGAATGGTGATAAGGGTGTAGCTCTGGCACC	31	TGGTGATAAGGGTGTAGCTCTG	22	7	100	1e-08	MIMAT0020917 Oryza sativa miR169i-5p.2	NA
osa-miR169p	AAGTGGCAAGTCTGTCCTTGGCTATGTA	28	GGCAAGTCTGTCCTTGGCTA	22	5	95	3e-05	MIMAT0001061 Oryza sativa miR169p	NA
osa-miR169q	CATGGGCAGTCTCCTTGGCTAGGGGG	26	CATGGGCAGTCTCCTTGGCTA	21	3	100	3e-08	MIMAT0001062 Oryza sativa miR169q	MIR169_4
osa-miR169r-5p	ATCCTAGCCAAGGATGATTTGCCTGGGCC	29	TAGCCAAGGATGATTTGCCTG	21	8	100	3e-08	MIMAT0026762 Oryza sativa miR169r-5p	MIR169_1
osa-miR171c-5p	TCCCGGATATTGGTGCGGTTCAATCGCCG	29	GGATATTGGTGCGGTTCAATC	21	4	100	3e-08	MIMAT0022877 Oryza sativa miR171c-5p	MIR171_1
osa-miR171d-3p	CCCATGATTGAGCCGTGCCAATATCGAAC	29	TGATTGAGCCGTGCCAATATC	21	9	100	3e-08	MIMAT0001065 Oryza sativa miR171d-3p	MIR171_1
osa-miR171d-5p	CCAGTGTTGGCCCGGCTCACTCAGAGTCC	29	TGTTGGCCCGGCTCACTCAGA	21	4	100	3e-08	MIMAT0022878 Oryza sativa miR171d-5p	MIR171_1
osa-miR171e-5p	CGTGTGTTGGCTCGGCTCACTCAGACTAC	29	TGTTGGCTCGGCTCACTCAGA	21	3	100	3e-08	MIMAT0022879 Oryza sativa miR171e-5p	MIR171_1
osa-miR171f-5p	AAATCGATGTTGGCATGGTTCAATCCCAG	29	TGTTGGCATGGTTCAATC	21	5	100	2e-06	MIMAT0022880 Oryza sativa miR171f-5p	MIR171_1
osa-miR171i-3p	TTTATTGAGCCGCGTCAATATCTCTGTAC	29	ATTGAGCCGCGTCAATATC	21	9	100	5e-07	MIMAT0001085 Oryza sativa miR171i-3p	MIR171_1
osa-miR172a	AAGGAGAATCTTGATGATGCTGCAGCCTC	29	AGAATCTTGATGATGCTGCA	21	2	100	1e-07	MIMAT0001069 Oryza sativa miR172a	MIR172
osa-miR172b	AAGCGGAATCTTGATGATGCTGCATCGAC	29	GGAATCTTGATGATGCTGCAT	21	10	100	3e-08	MIMAT0001070 Oryza sativa miR172b	MIR172
osa-miR1846b-3p	TTAACGGTGACCCCGGTCTCCTCGCCGGTCATC	33	TGACCCCGGTCTCCTCGCCGG	21	3	95.24	1e-05	MIMAT0007791 Oryza sativa miR1846b-3p	MIR1846
osa-miR1846c-5p	CTCCAGTGAGGAGGCCGGGGCCGCTGGATCTAG	33	AGTGAGGAGGCCGGGGCCGCT	21	16	100	4e-08	MIMAT0009165 Oryza sativa miR1846c-5p	MIR1846
osa-miR1846d-3p	CGAGGTATCCGGCGCCGCAGGGAGGGCCG	29	TATCCGGCGCCGCAGGGAGG	20	4	100	1e-07	MIMAT0007765 Oryza sativa miR1846d-3p	MIR1846
osa-miR1846d-5p	GACATCCCACCGAGCAGCCGGATCTCTAGG	30	TCCCACCGAGCAGCCGGATCTC	22	7	100	9e-09	MIMAT0007764 Oryza sativa miR1846d-5p	MIR1846
osa-miR1846e	CTCCAACGAGGAGGCCGGGACCACCGGATCTTG	33	CAACGAGGAGGCCGGGACCA	20	10	100	2e-07	MIMAT0010042 Oryza sativa miR1846e	MIR1846
osa-miR1847.1	AATCTTTGTGCAGTTTGCAGTTGTGGACT	29	TGCAGTTTGCAGTTGTGG	21	1	100	2e-06	MIMAT0007766 Oryza sativa miR1847.1	NA
osa-miR1847.2	GGACGGAGAGGCACTGACATGTGGGCCCGCCCACGCCCTC	40	GGCACTGACATGTGGGCC	24	4	94.44	0.0007	MIMAT0007767 Oryza sativa miR1847.2	NA
osa-miR1848	CTCTGAACGCGCGCGCCGCCGAGGAGCCGACCGTTC	36	ACGCGCGCGCCGCCGAGG	21	1	94.44	0.0006	MIMAT0007768 Oryza sativa miR1848	NA
osa-miR1849	TACATATCGTATCCTAGGTTGGTTTCGCG	29	TATCGTATCCTAGGTTGGTTT	21	1	100	3e-08	MIMAT0007769 Oryza sativa miR1849	NA
osa-miR1850.1	TAAGTGGAAAGTTGGGAGATTGGGGTGTA	29	TGGAAAGTTGGGAGATTGGGG	21	6	100	3e-08	MIMAT0007770 Oryza sativa miR1850.1	NA
osa-miR1850.2	CTACATTTTTGTGTGGGAACTAAACGGGTTCC	32	TTGTGTGGGAACTAAACG	21	7	94.44	0.0006	MIMAT0009210 Oryza sativa miR1850.2	NA
osa-miR1850.3	ACCGAAATTTTTAAGATTGGTGTGAACTAATC	32	AAGATTGGTGTGAACTAA	22	6	94.44	0.0006	MIMAT0009211 Oryza sativa miR1850.3	NA
osa-miR1851	ATCCCAAAATGCCATCCCGGACGGTCATC	29	CCAAAATGCCATCCCGGACG	21	3	95	3e-05	MIMAT0007771 Oryza sativa miR1851	NA
osa-miR1852	CATGAAACTAAACCTGCATTCTGAATCCACTC	32	ACCTGCATTCTGAATCCA	21	6	100	2e-06	MIMAT0007772 Oryza sativa miR1852	NA
osa-miR1857-3p	CCATTCATGCTCCAAGAAAACCAGGGTTT	29	TCATGCTCCAAGAAAACCAGG	21	2	100	3e-08	MIMAT0007780 Oryza sativa miR1857-3p	NA
osa-miR1857-5p	CTCATGGTTTTTTTGGAGCATGAGGCAGC	29	TGGTTTTTTTGGAGCATGAGG	21	3	100	3e-08	MIMAT0007779 Oryza sativa miR1857-5p	NA
osa-miR1859	CTTTTTTCCTATGACGTCCATTCCAATATC	30	TTTCCTATGACGTCCATTCCAA	22	6	100	9e-09	MIMAT0007792 Oryza sativa miR1859	MIR2118
osa-miR1860-3p	TAGCTAGATCTGGAAGCTAGGTTTTCCATC	30	ATCTGGAAGCTAGGTTTTC	22	7	100	6e-07	MIMAT0007794 Oryza sativa miR1860-3p	NA
osa-miR1860-5p	CAGTAAAACCAGCTTCCAGATCTGCGTAC	29	AAAACCAGCTTCCAGATCT	21	2	100	5e-07	MIMAT0007793 Oryza sativa miR1860-5p	NA
osa-miR1861a	TACTTGATCTTGAGGCAGAAACTGAGGTC	29	TGATCTTGAGGCAGAAACTGAG	22	9	100	9e-09	MIMAT0007796 Oryza sativa miR1861a	MIR1861
osa-miR1861d	TATTTGGTCTTGAGGCAGGAACTGAGATCC	30	TGGTCTTGAGGCAGGAACTGAG	22	1	100	9e-09	MIMAT0007799 Oryza sativa miR1861d	MIR1861
osa-miR1861g	TTAACGATCTTGTGGCAAAAACTGAGGTCC	30	TCTTGTGGCAAAAACTGAG	22	8	94.74	0.0001	MIMAT0007802 Oryza sativa miR1861g	MIR1861
osa-miR1861h	CCAGCGGTCTTGAGGCAGGAACTGAGGACC	30	CGGTCTTGAGGCAGGAACTGAG	22	11	100	9e-09	MIMAT0007803 Oryza sativa miR1861h	MIR1861
osa-miR1861k	TGACCGGTCTTGTGGCAAGAACTGAGACC	29	CGGTCTTGTGGCAAGAACTGAG	22	9	100	9e-09	MIMAT0007806 Oryza sativa miR1861k	MIR1861
osa-miR1862c	AGCCCGAGGTTGATTTATTTTGGGACGGATCC	32	CGAGGTTGATTTATTTTGGGACG	24	6	95.65	6e-07	MIMAT0007812 Oryza sativa miR1862c	MIR1862
osa-miR1862d	AAATACTAGGTTTGTTTATTTTGGGACGAGCC	32	ACTAGGTTTGTTTATTTTGGGACG	24	13	100	6e-10	MIMAT0007830 Oryza sativa miR1862d	MIR1862
osa-miR1862e	CACCCTAGATTTGTTTATTTTGGGACGGCCTG	32	CTAGATTTGTTTATTTTGGGACGG	24	7	100	6e-10	MIMAT0007833 Oryza sativa miR1862e	MIR1862
osa-miR1862f	TATAGGTATGATGTTGGTTTATTTTGGAGATC	32	ATGATGTTGGTTTATTTTGG	20	7	95	4e-05	MIMAT0019669 Oryza sativa miR1862f	NA
osa-miR1863a	GGGCTGACTCTGATACCATGATAGAGTAT	29	CTCTGATACCATGATAGA	24	1	94.44	0.0005	MIMAT0007813 Oryza sativa miR1863a	NA
osa-miR1863b	TACTAGCTCTGATACCATGTTATTGATTTCTC	32	AGCTCTGATACCATGTTA	24	2	100	2e-06	MIMAT0013836 Oryza sativa miR1863b	MIR1863
osa-miR1863b.2	AGCCTAGAGACTTGGCTGATGCATTACTTCTC	32	AGAGACTTGGCTGATGCATTACT	23	7	100	3e-09	MIMAT0020950 Oryza sativa miR1863b.2	MIR1863
osa-miR1863c	CTACTAGAAACTTGGCTGATGCATTACTACGG	32	TAGAAACTTGGCTGATGCATTACT	24	6	100	6e-10	MIMAT0013830 Oryza sativa miR1863c	MIR1863
osa-miR1864	ACGCTTGTAGTAACGTTATGGTCAATGTTCCC	32	TTGTAGTAACGTTATGGTCAATGT	24	13	95.83	2e-07	MIMAT0007814 Oryza sativa miR1864	NA
osa-miR1868	CGGCGCGTGCTCACGGAAAACGAGGGAGCAGC	32	TCACGGAAAACGAGGGAGCAGC	24	4	100	1e-08	MIMAT0007820 Oryza sativa miR1868	NA
osa-miR1870-3p	TTAGTTTAGGGCTAATTCAGCATAAACAGCCC	32	TTTAGGGCTAATTCAGCATAAACA	24	7	95.83	2e-07	MIMAT0015270 Oryza sativa miR1870-3p	NA
osa-miR1870-5p	TAAGTGCTGAATTAGACCTAGTGGGCATATCC	32	TGCTGAATTAGACCTAGTGGGCAT	24	8	100	6e-10	MIMAT0007823 Oryza sativa miR1870-5p	NA
osa-miR1871	GGTTATGGCTCTGATATCATGTTGGTTTCGAC	32	ATGGCTCTGATATCATGTTGGTTT	24	7	100	6e-10	MIMAT0007824 Oryza sativa miR1871	NA
osa-miR1872	TTGCTGTTGAACTGTAAGTCTGTGACGACAG	31	GAACTGTAAGTCTGTGACG	24	7	100	6e-07	MIMAT0007825 Oryza sativa miR1872	NA
osa-miR1873	TTGTTCAACATGGTATCAGAACTGGAAGGTTG	32	TCAACATGGTATCAGAACTGGAAG	24	10	95.83	2e-07	MIMAT0007826 Oryza sativa miR1873	NA
osa-miR1874-3p	CACATATGGATGGAGGTGTAACCCGATGATCC	32	TATGGATGGAGGTGTAACCCGATG	24	34	100	6e-10	MIMAT0007828 Oryza sativa miR1874-3p	NA
osa-miR1874-5p	CAGCTAGGGCTACTACACCATCCATAAGGGTC	32	TAGGGCTACTACACCATCCATAAG	24	13	100	6e-10	MIMAT0007827 Oryza sativa miR1874-5p	NA
osa-miR1875	CCAAACAATGGAGTGAAGTGCAACAGAAGGTC	32	ACAATGGAGTGAAGTGCAACAGAA	24	8	100	6e-10	MIMAT0007829 Oryza sativa miR1875	NA
osa-miR1876	CCACTATAAGTGGGTTTGTGGGCTGGCCCACTG	33	ATAAGTGGGTTTGTGGGCTGGCCC	24	42	100	7e-10	MIMAT0007831 Oryza sativa miR1876	NA
osa-miR1878	GTAGACTTAATCTGGACACTATAAAAGAGTCC	32	ACTTAATCTGGACACTATAAAAGA	24	21	100	6e-10	MIMAT0007835 Oryza sativa miR1878	MIR1878
osa-miR1879	CTGCTTGGTTTAGGGATAAGGTGGGATTGGAG	32	TTGGTTTAGGGATAAGGTGG	24	3	95	4e-05	MIMAT0007836 Oryza sativa miR1879	NA
osa-miR1880	ACCATTTTTCCAAGCGGGCCACTTAAGCAATGCCC	35	TTCCAAGCGGGCCACTTAAGCA	24	1	100	1e-08	MIMAT0007837 Oryza sativa miR1880	NA
osa-miR1881	CCGCAATGTTATTGTAGCGTGGTGGTGTGGTC	32	AATGTTATTGTAGCGTGGTGGTGT	24	8	100	6e-10	MIMAT0007838 Oryza sativa miR1881	NA
osa-miR1883a	GAGAGTTCCATTCTCGATCCGTCACAGGAATC	32	TTCCATTCTCGATCCGTCACAGG	24	7	91.3	0.0002	MIMAT0007851 Oryza sativa miR1883a	MIR1883
osa-miR2055	CATTTTCCTTGGGAAGGTGGTTTCACTCC	29	TTTCCTTGGGAAGGTGGTTTC	21	6	100	3e-08	MIMAT0009980 Oryza sativa miR2055	NA
osa-miR2091-5p	TGCTCGACGACCGAGCAGAGGAGGAGGGCCCT	32	ACCGAGCAGAGGAGGAGG	21	4	94.44	0.0006	MIMAT0010046 Oryza sativa miR2091-5p	NA
osa-miR2093-3p	ATGGAAGAATGCATTAATTGGAAGATGTGTTC	32	ATGCATTAATTGGAAGATGT	20	6	100	2e-07	MIMAT0010051 Oryza sativa miR2093-3p	NA
osa-miR2093-5p	GCACTGTGTGCATTAATTGGAAGAACACACC	31	GTGCATTAATTGGAAGAACA	20	6	100	2e-07	MIMAT0010050 Oryza sativa miR2093-5p	NA
osa-miR2094-3p	GGGTACAGAGCTGCGGCATCCACGTCGATGCC	32	CAGAGCTGCGGCATCCACGTCG	22	6	95.45	2e-06	MIMAT0010053 Oryza sativa miR2094-3p	NA
osa-miR2094-5p	GGTGGTGGCTGCTAGGCTCCTGGGTGCACGCT	32	TGGCTGCTAGGCTCCTGGGTG	21	5	100	4e-08	MIMAT0010052 Oryza sativa miR2094-5p	NA
osa-miR2095-3p	CGCAAGTATTATACTTATCATAAATGGACTCC	32	ATACTTATCATAAATGGA	20	9	100	2e-06	MIMAT0010055 Oryza sativa miR2095-3p	NA
osa-miR2095-5p	CAAGTGATAATTTTACGATGAATAGAAGGATTC	33	TGATAATTTTACGATGAATAG	22	5	100	4e-08	MIMAT0010054 Oryza sativa miR2095-5p	NA
osa-miR2097-3p	CAAAACAAATGTGACACGAAGAAGAGAACTGA	32	AAATGTGACACGAAGAAGAGAA	22	2	95.45	2e-06	MIMAT0010059 Oryza sativa miR2097-3p	NA
osa-miR2098-3p	AAATCGGTTTGTCAAGCGGAGTGCACATGGGC	32	CGGTTTGTCAAGCGGAGTGC	20	1	100	2e-07	MIMAT0010061 Oryza sativa miR2098-3p	NA
osa-miR2098-5p	CGTTAATCTCCATCGGCTGCCTCCACGGGGTC	32	CATCGGCTGCCTCCACGGG	20	7	100	6e-07	MIMAT0010060 Oryza sativa miR2098-5p	NA
osa-miR2100-5p	TCTTTTGTTTGGCAACTTGAGAGAAGGGGGTC	32	TTGTTTGGCAACTTGAGAGAA	22	8	100	4e-08	MIMAT0010064 Oryza sativa miR2100-5p	NA
osa-miR2101-3p	AAGCCGATTTAACTCAAGTGAGCATTGTATCG	32	ATTTAACTCAAGTGAGCATTGT	22	3	100	1e-08	MIMAT0010067 Oryza sativa miR2101-3p	NA
osa-miR2101-5p	CAATCTCCACATTTTAACTTGTAAACATGGGG	32	ACATTTTAACTTGTAAACATG	22	3	100	4e-08	MIMAT0010066 Oryza sativa miR2101-5p	NA
osa-miR2102-5p	GGGTGGCGGCGGTGGCTTGCTCTGGGGTCAGC	32	GTGGCGGCGGTGGCTTGC	20	1	94.44	0.0006	MIMAT0010068 Oryza sativa miR2102-5p	NA
osa-miR2103	GTTTCCCTCTCCGCGCGCGACACGTGTCTTTA	32	TTTCCCTCTCCGCGCGCG	22	2	94.44	0.0006	MIMAT0010071 Oryza sativa miR2103	NA
osa-miR2104	AGGCCGTGCGCCTCGCTTCCCCTCGCCGCCGTTATA	36	CTCGCTTCCCCTCGCCGC	22	3	94.44	0.0006	MIMAT0010072 Oryza sativa miR2104	NA
osa-miR2105	GCAAAATTTGTGATGTGAATGATTCATTGATTTGGAATC	39	TTGTGATGTGAATGATTCAT	20	4	100	2e-07	MIMAT0010073 Oryza sativa miR2105	NA
osa-miR2106	GGCCATCTGGCGGAGGTTTTCTGGATACATTCCCTC	36	GAGGTTTTCTGGATACATT	21	10	100	6e-07	MIMAT0010074 Oryza sativa miR2106	NA
osa-miR2118a	ATACGAGAATCGGAGGCATCGAGAACATTTC	31	GAATCGGAGGCATCGAGAA	22	2	94.74	0.0001	MIMAT0011740 Oryza sativa miR2118a	MIR2118
osa-miR2118b	CGACTTCCCAATGCCTCCCATTCCTAGCGC	30	TTCCCAATGCCTCCCATTCCTA	22	5	95.45	2e-06	MIMAT0011741 Oryza sativa miR2118b	MIR2118
osa-miR2118c	GCGTTTGGTAGGAATAGGAGGCATCGTTC	29	TAGGAATAGGAGGCATCG	22	2	100	2e-06	MIMAT0011742 Oryza sativa miR2118c	MIR2118
osa-miR2118d	CGCGTTCCTGATGCCTCCCATGCCTAGTTG	30	TTCCTGATGCCTCCCATGCCTA	22	3	100	9e-09	MIMAT0011743 Oryza sativa miR2118d	MIR2118
osa-miR2118f	AGTCTTCCTGATGCCTCCCATTCCTAACCG	30	TTCCTGATGCCTCCCATTCCTA	22	3	100	9e-09	MIMAT0011745 Oryza sativa miR2118f	MIR2118
osa-miR2118f	GCTCTTCCTGATGCCTCCCATTCCTAGTAC	30	TTCCTGATGCCTCCCATTCCTA	22	3	100	9e-09	MIMAT0011745 Oryza sativa miR2118f	MIR2118
osa-miR2118g	AAAATTCCTAATGCCTCCCATTCCTACCCC	30	TTCCTAATGCCTCCCATTCCTA	22	7	100	9e-09	MIMAT0011746 Oryza sativa miR2118g	MIR2118
osa-miR2118h	AATATTCCTGATGCCTCTCATTCCTACCCC	30	TTCCTGATGCCTCTCATTCCTA	22	4	100	9e-09	MIMAT0011747 Oryza sativa miR2118h	MIR2118
osa-miR2118i	CGATTTCCTAGTGCCTCCCATTCCTAAACC	30	TTCCTAGTGCCTCCCATTCCTA	22	5	100	9e-09	MIMAT0011748 Oryza sativa miR2118i	MIR2118
osa-miR2118l	CATATTCCTAATGCTTCCCATTCCTACACC	30	TTCCTAATGCTTCCCATTCCTA	22	3	100	9e-09	MIMAT0011751 Oryza sativa miR2118l	MIR2118
osa-miR2118o	ACCGCTCCTGATGCCTCCCAAGCCTACCTC	30	CTCCTGATGCCTCCCAAGCCTA	22	8	100	9e-09	MIMAT0011754 Oryza sativa miR2118o	MIR2118
osa-miR2118p	CGTATTCCCGATGCCTCCCATGCCTAGCCG	30	TTCCCGATGCCTCCCATGCCTA	22	6	100	9e-09	MIMAT0011755 Oryza sativa miR2118p	MIR2118
osa-miR2118r	CCATTTCCCAATGCCTCCCATGCCTATAAC	30	TTCCCAATGCCTCCCATGCCTA	22	11	100	9e-09	MIMAT0011757 Oryza sativa miR2118r	MIR2118
osa-miR2120	TGGTAAAGATCTTTACTCCCGGTTGTTGACC	31	AAAGATCTTTACTCCCGGTTGTT	24	6	95.65	6e-07	MIMAT0011179 Oryza sativa miR2120	NA
osa-miR2120b-3p	TGGTAACACCAACCGGGACTAAAAATAGTCC	31	TAACACCAACCGGGACTAAA	20	10	95	4e-05	MIMAT0044645 Oryza sativa miR2120b-3p	NA
osa-miR2120b-5p	ACAGACACACCAACCGAGACTAAAGATAGTCC	32	ACACCAACCGAGACTAAAGA	20	11	95	4e-05	MIMAT0044644 Oryza sativa miR2120b-5p	NA
osa-miR2121a	GCTCGAAAACGGAGCGATCCATTAGCGCGGAC	32	AAAACGGAGCGATCCATTAGCGCG	24	12	95.83	2e-07	MIMAT0011180 Oryza sativa miR2121a	MIR2121
osa-miR2275b	GATAAGGGACTGCCAGTGAGATACTGGAGGAAACCC	36	TGAGATACTGGAGGAAACC	22	6	94.74	0.0002	MIMAT0011759 Oryza sativa miR2275b	MIR2275
osa-miR2275c	AAACAGAATTGGAGGAAAACAAACTGATG	29	AGAATTGGAGGAAAACAAACTGA	23	5	100	2e-09	MIMAT0022147 Oryza sativa miR2275c	MIR2275
osa-miR2275d	TTCACTTGTTTTTCTCCAATATCTCAGGTC	30	CTTGTTTTTCTCCAATATCTCA	22	9	100	9e-09	MIMAT0022158 Oryza sativa miR2275d	MIR2275
osa-miR2863b	TCAATTCGTTTATTTGGACTAGAGTGGTAG	30	TTCGTTTATTTGGACTAGAGT	21	5	100	4e-08	MIMAT0013818 Oryza sativa miR2863b	MIR2863
osa-miR2863c	GTTATAGCTGAATAGGACTAGAAGGGGCCACC	32	TAGGACTAGAAGGGGCCA	24	5	94.44	0.0006	MIMAT0021093 Oryza sativa miR2863c	MIR2863
osa-miR2864.2	ATGCTTGTTTTGCATTGTAGAGGTAGTGC	29	TTGTTTTGCATTGTAGAGGTA	21	4	95.24	8e-06	MIMAT0013811 Oryza sativa miR2864.2	NA
osa-miR2865	AAAAATCACGGTGCAGTCGACTGCAGAGTGAT	32	CACGGTGCAGTCGACTGC	22	4	94.44	0.0006	MIMAT0013812 Oryza sativa miR2865	NA
osa-miR2866	TGTCTGCTGAGCACAAACTAGAGAAGCTC	29	TGCTGAGCACAAACTAGA	20	5	94.44	0.0005	MIMAT0013813 Oryza sativa miR2866	NA
osa-miR2867-5p	AAGAGAGTGGGATGTGTGGGATAGCACACTAC	32	GGGATGTGTGGGATAGCACA	22	15	95	4e-05	MIMAT0013814 Oryza sativa miR2867-5p	NA
osa-miR2870	CAACTAATCAGTTTGGGGAGACAAAGCTG	29	TAATCAGTTTGGGGAGACAAA	21	3	100	3e-08	MIMAT0013817 Oryza sativa miR2870	NA
osa-miR2871a-5p	ATATTGACCGTAGAAACTAGCATAGGGTC	29	GACCGTAGAAACTAGCATAG	24	13	100	1e-07	MIMAT0020948 Oryza sativa miR2871a-5p	MIR2871
osa-miR2871b-3p	ATAGTATTTTAGTTTCTATGGTCACCAGT	29	TATTTTAGTTTCTATGGTCAC	21	5	100	3e-08	MIMAT0013821 Oryza sativa miR2871b-3p	MIR2871
osa-miR2871b-5p	ATCTACCATGGTGACCGTAGAAACTGGAAT	30	CATGGTGACCGTAGAAACT	24	2	100	6e-07	MIMAT0037363 Oryza sativa miR2871b-5p	MIR2871
osa-miR2872	ACCAGATCGGTTTGTGGAACCCCAAATTGTTC	32	TCGGTTTGTGGAACCCCA	21	6	94.44	0.0006	MIMAT0013822 Oryza sativa miR2872	NA
osa-miR2873a	GGACAAGTTTGGACTTAAATTTGGTAACAACCC	33	AAGTTTGGACTTAAATTTGGTAAC	24	6	100	7e-10	MIMAT0013823 Oryza sativa miR2873a	MIR2873
osa-miR2873b	CAATAGTTTGGAGTTGAGATTTGGTTACC	29	TTGGAGTTGAGATTTGGT	21	6	94.44	0.0005	MIMAT0019685 Oryza sativa miR2873b	MIR2873
osa-miR2873c	AGCCAATGAAGTTGAGTTTGGATTTGAGCTTC	32	AATGAAGTTGAGTTTGGA	21	5	100	2e-06	MIMAT0023311 Oryza sativa miR2873c	MIR2873
osa-miR2874	TTCAAAGACACTGTATGACACTGTAATGCCTT	32	GACACTGTATGACACTGT	24	6	94.44	0.0006	MIMAT0013824 Oryza sativa miR2874	NA
osa-miR2875	AATGTATGAACTGTAGATGACTGTAAATCATA	32	AACTGTAGATGACTGTAAAT	24	4	95	4e-05	MIMAT0013825 Oryza sativa miR2875	NA
osa-miR2877	AAGGTTGCATCCTCTGCACATTGGGCCTTGACC	33	TTGCATCCTCTGCACATTGGGCCT	24	5	95.83	2e-07	MIMAT0013827 Oryza sativa miR2877	NA
osa-miR2878-3p	CTTACCTCAGGATTTTATACATGTAAAGGCCC	32	CAGGATTTTATACATGTAAAG	24	6	100	4e-08	MIMAT0013829 Oryza sativa miR2878-3p	NA
osa-miR2878-5p	TAGCATGTATAAAATTCTGAGGATGTTATATC	32	CATGTATAAAATTCTGAGGATG	24	5	100	1e-08	MIMAT0013828 Oryza sativa miR2878-5p	NA
osa-miR2880	CAACGGAATCCCGTTGGGACAGGATCCCC	29	ACGGAATCCCGTTGGGACAGGAT	24	9	91.3	0.0001	MIMAT0013832 Oryza sativa miR2880	NA
osa-miR2905	AGCAAGGGACTTTGTTACTGACATGTAACCCA	32	CTTTGTTACTGACATGTA	21	5	94.44	0.0006	MIMAT0013819 Oryza sativa miR2905	NA
osa-miR2907b	GGCTGGCAGCTGAGCGAGAGCCTCGGGATATG	32	GGCAGCTGAGCGAGAGCCTCGG	22	1	90.91	0.0006	MIMAT0014037 Oryza sativa miR2907b	MIR2907
osa-miR319a-3p	TTCCACTGGATGACGCGGGAGCTAAGGCC	29	ACTGGATGACGCGGGAGCTAA	21	7	100	3e-08	MIMAT0020915 Oryza sativa miR319a-3p	MIR159
osa-miR319b	TTAGTTGGACTGAAGGGTGCTCCCTTGTCC	30	TTGGACTGAAGGGTGCTCCC	20	102	100	1e-07	MIMAT0001029 Oryza sativa miR319b	MIR159
osa-miR390-3p	TTCAAGCTCAGGATAGATAGCGCCTGACC	29	AGCTCAGGATAGATAGCG	20	5	100	2e-06	MIMAT0022888 Oryza sativa miR390-3p	MIR390
osa-miR390-5p	CTGAAAGCTCAGGAGGGATAGCGCCCCCC	29	AAGCTCAGGAGGGATAGCGCC	21	9	100	3e-08	MIMAT0001588 Oryza sativa miR390-5p	MIR390
osa-miR393b-3p	GCACTCAGTGCAATCCCTTTGGAATGCACA	30	TCAGTGCAATCCCTTTGGAAT	21	96	100	4e-08	MIMAT0015123 Oryza sativa miR393b-3p	MIR393
osa-miR393b-5p	CTCATCCAAAGGGATCGCATTGATCTGTC	29	TCCAAAGGGATCGCATTGATCT	22	8	100	9e-09	MIMAT0001078 Oryza sativa miR393b-5p	MIR393
osa-miR394	ATCGTTGGCATTCTGTCCACCTCCGTCC	28	TTGGCATTCTGTCCACCTCC	20	13	100	1e-07	MIMAT0000958 Oryza sativa miR394	MIR394
osa-miR395c	CTCCAGTAAGAAGCTGAACTGTTTGGAGGAAC	32	TGAACTGTTTGGAGGAAC	21	7	94.44	0.0006	MIMAT0000972 Oryza sativa miR395c	MIR395
osa-miR395e	CCTCGTGAAGTGTTTGGGGGAACTCTTTCAC	31	GTGAAGTGTTTGGGGGAACTC	21	7	100	4e-08	MIMAT0000961 Oryza sativa miR395e	MIR395
osa-miR395t	TACAGGTTCGGAAGTGTTTGCGGAAACTTC	30	GAAGTGTTTGCGGAAACT	21	5	94.44	0.0005	MIMAT0000969 Oryza sativa miR395t	MIR395
osa-miR395w	CAACGAGTTGTTGTGAAGTGTTTGGGGGATCC	32	GTGAAGTGTTTGGGGGAT	22	2	100	2e-06	MIMAT0003877 Oryza sativa miR395w	MIR395
osa-miR395x	AGATCATAGTGAAGTGTTTGGAGCAGCTCTGG	32	GTGAAGTGTTTGGAGCAGCTC	21	2	95.24	1e-05	MIMAT0014124 Oryza sativa miR395x	MIR395
osa-miR396a-3p	AGAAGTTCAATAAAGCTGTGGGAAACAGC	29	GTTCAATAAAGCTGTGGGAA	20	11	100	1e-07	MIMAT0022863 Oryza sativa miR396a-3p	MIR396
osa-miR396a-5p	GCTGTTCCACAGCTTTCTTGAACTGGCCC	29	TTCCACAGCTTTCTTGAACTG	21	11	100	3e-08	MIMAT0000977 Oryza sativa miR396a-5p	MIR396
osa-miR396c-3p	AATTGGTCAAGAAAGCTGTGGGAAGGACG	29	GGTCAAGAAAGCTGTGGGAAG	21	8	100	3e-08	MIMAT0022865 Oryza sativa miR396c-3p	MIR396
osa-miR396c-5p	ACAGTTCCACAGCTTTCTTGAACTTTCCC	29	TTCCACAGCTTTCTTGAACTT	21	20	100	3e-08	MIMAT0000979 Oryza sativa miR396c-5p	MIR396
osa-miR396e-3p	CATCGTTCAAGAAAGCCCATGGAAAGAAA	29	GTTCAAGAAAGCCCATGGAAA	24	3	100	3e-08	MIMAT0015159 Oryza sativa miR396e-3p	MIR396
osa-miR396e-5p	AAAGTCCACAGGCTTTCTTGAACTGGGGA	29	TCCACAGGCTTTCTTGAACTG	21	39	100	3e-08	MIMAT0001601 Oryza sativa miR396e-5p	MIR396
osa-miR396f-3p	TTAGATAGTTCAAGAAAGTCCTTGGAAACTCA	32	ATAGTTCAAGAAAGTCCTTGGAAA	24	5	100	6e-10	MIMAT0015292 Oryza sativa miR396f-3p	MIR396
osa-miR396f-5p	ACTCTCCACAGGCTTTCTTGAACTGGGCC	29	TCTCCACAGGCTTTCTTGAACT	22	17	100	9e-09	MIMAT0010070 Oryza sativa miR396f-5p	MIR396
osa-miR396h	CTGATCCACAGGCTTTCTTGAACGGCGG	28	TCCACAGGCTTTCTTGAACGG	21	1	100	3e-08	MIMAT0013834 Oryza sativa miR396h	MIR396_2
osa-miR3979-3p	CAATCTTCGGGGGAGGAGAGAAGCGGCG	28	CTTCGGGGGAGGAGAGAAGC	20	6	100	1e-07	MIMAT0019674 Oryza sativa miR3979-3p	NA
osa-miR3979-5p	CCGCTCTCTCTCTCCCTTGAAGGCTGGGA	29	TCTCTCTCTCCCTTGAAGGC	20	3	100	1e-07	MIMAT0019673 Oryza sativa miR3979-5p	NA
osa-miR397a	CGCATTGAGTGCAGCGTTGATGAACCCTCA	30	CATTGAGTGCAGCGTTGATG	21	2	100	1e-07	MIMAT0000980 Oryza sativa miR397a	MIR397
osa-miR397b	GGCCTATTGAGTGCAGCGTTGATGAACCGCTC	32	TATTGAGTGCAGCGTTGATG	21	9	100	2e-07	MIMAT0000981 Oryza sativa miR397b	MIR397
osa-miR3981-3p	CTTCTTATAGTATTAGGATATGTCTCAATC	30	AGTATTAGGATATGTCTCA	21	2	94.74	0.0001	MIMAT0019684 Oryza sativa miR3981-3p	NA
osa-miR3981-5p	TCGGCGTAGTAATAGGATATGTCCCATCCTAC	32	TAGTAATAGGATATGTCCCA	21	8	95	4e-05	MIMAT0019683 Oryza sativa miR3981-5p	NA
osa-miR3982-3p	CACTGCCTACATGGAGCGCCACGTCCGCG	29	TGCCTACATGGAGCGCCA	21	2	100	2e-06	MIMAT0019687 Oryza sativa miR3982-3p	NA
osa-miR3982-5p	CAACGGCGCTCCACGTAGGCAACAACGAC	29	GCGCTCCACGTAGGCAACAA	21	5	100	1e-07	MIMAT0019686 Oryza sativa miR3982-5p	NA
osa-miR398b	GTGTTGTGTTCTCAGTTCGCCCCTGCATG	29	TGTGTTCTCAGTTCGCCCCTG	21	1	95.24	8e-06	MIMAT0000983 Oryza sativa miR398b	MIR398
osa-miR399b	ATCGTGCCAAAGGAGAATTGCCCTGATCC	29	TGCCAAAGGAGAATTGCCCTG	21	7	100	3e-08	MIMAT0000985 Oryza sativa miR399b	MIR399
osa-miR399d	TATATGCCAAAGGAGAGTTGCCCTGTGGT	29	TGCCAAAGGAGAGTTGCCCTG	21	8	100	3e-08	MIMAT0000987 Oryza sativa miR399d	MIR399
osa-miR399i	TGTCGGCAGCTCTCCTCTGGCAGACGCC	28	GGCAGCTCTCCTCTGGCA	21	5	94.44	0.0005	MIMAT0000992 Oryza sativa miR399i	MIR399
osa-miR399j	CATGTGCCAAAGGAGAGTTGCCCTAGGCA	29	TGCCAAAGGAGAGTTGCCCTA	21	10	100	3e-08	MIMAT0000993 Oryza sativa miR399j	MIR399
osa-miR408-3p	CGCCCTGCACTGCCTCTTCCCTGGCGCAC	29	CTGCACTGCCTCTTCCCTGGC	21	5	100	3e-08	MIMAT0001079 Oryza sativa miR408-3p	MIR408
osa-miR408-5p	ATGTCAGGGATGAGGCAGAGCATGGATTT	29	CAGGGATGAGGCAGAGCATGG	21	3	100	3e-08	MIMAT0022884 Oryza sativa miR408-5p	MIR408
osa-miR414	ATCCTGACGATGATGACGAGGATGATGATGCATC	34	GACGATGATGACGAGGATGA	21	5	95	4e-05	MIMAT0001330 Oryza sativa miR414	NA
osa-miR419	TACTTGATGAATGCTGAAGATGTTGTTAGATGTTGTCATT	40	TGATGAATGCTGAAGATGTTG	21	4	95.24	1e-05	MIMAT0001335 Oryza sativa miR419	NA
osa-miR435	GAAAATCCGGTATTGGAGTTGAGGGATGGATC	32	ATCCGGTATTGGAGTTGA	20	6	100	2e-06	MIMAT0001585 Oryza sativa miR435	NA
osa-miR437	GAGTTAGAGCAGTTTGACTTTGTCCAAACGCT	32	AGTTAGAGCAGTTTGACTT	21	4	94.74	0.0002	MIMAT0001586 Oryza sativa miR437	MIR437
osa-miR439c	GCGTTTGAACAACCGTGGTTCGACAGGCTTGC	32	GAACAACCGTGGTTCGACA	21	5	94.74	0.0002	MIMAT0001591 Oryza sativa miR439c	MIR439
osa-miR443	GGGATCATAATACAACAAATCTGGACATGTTG	32	ATCATAATACAACAAATCTGGA	22	5	90.91	0.0006	MIMAT0001606 Oryza sativa miR443	NA
osa-miR444a-3p.1	TAGTCGGCAAGCTAGAGGCAGCAACGCCG	29	GCAAGCTAGAGGCAGCAA	21	1	94.44	0.0005	MIMAT0001617 Oryza sativa miR444a-3p.1	NA
osa-miR444a-5p	CACCGCTAGAGGTGGCAACTGCATAATTTCCTT	33	GCTAGAGGTGGCAACTGCATA	21	10	100	4e-08	MIMAT0020918 Oryza sativa miR444a-5p	MIR444
osa-miR444b.2	AAAGTGCAGTTGTTGTCTCAAGCTTCTGC	29	TGCAGTTGTTGTCTCAAGCTT	21	13	100	3e-08	MIMAT0005968 Oryza sativa miR444b.2	MIR444
osa-miR444b.2	AACATGCAGTTGTTGTCTCAAGCTTGTCC	29	TGCAGTTGTTGTCTCAAGCTT	21	10	100	3e-08	MIMAT0005968 Oryza sativa miR444b.2	MIR444
osa-miR444c.1	AAGGTGTTGTCTCAAGCTTGCTGCCACCC	29	TGTTGTCTCAAGCTTGCTGCC	21	11	100	3e-08	MIMAT0005971 Oryza sativa miR444c.1	MIR444
osa-miR444d.2	AAGTTGCAGTTGCTGCCTCAAGCTTCTTC	29	TGCAGTTGCTGCCTCAAGCTT	21	8	100	3e-08	MIMAT0005973 Oryza sativa miR444d.2	MIR444
osa-miR444d.3	GGTATTGTGGCTTTCTTGCAAGTTGTTTC	29	TTGTGGCTTTCTTGCAAGTTG	21	7	100	3e-08	MIMAT0005972 Oryza sativa miR444d.3	MIR444
osa-miR444f	GCATTGCAGTTGTTGCCTCAAGCTTCTGC	29	TGCAGTTGTTGCCTCAAGCTT	21	5	100	3e-08	MIMAT0005976 Oryza sativa miR444f	MIR444
osa-miR5072	TGCTTCCCCAGCGGAGTCGCCAGGGC	26	TTCCCCAGCGGAGTCGCCA	22	15	100	5e-07	MIMAT0020552 Oryza sativa miR5072	NA
osa-miR5073	CGCTGTTTGGTGAATCGGAAACTTTTTTCAATTTATCC	38	GTTTGGTGAATCGGAAACT	23	17	100	7e-07	MIMAT0020555 Oryza sativa miR5073	NA
osa-miR5074	TTCGCGGGAAGGCCACCGTCGGGATCGCTTTC	32	GAAGGCCACCGTCGGGATCGC	21	6	100	4e-08	MIMAT0020559 Oryza sativa miR5074	NA
osa-miR5075	CAAGGAGGACGGCGGCGTCGGAGAGCGAGGAC	32	GGACGGCGGCGTCGGAGA	21	9	94.44	0.0006	MIMAT0020561 Oryza sativa miR5075	NA
osa-miR5076	CCATTCGAAATGGGAGCAGAGCAGGTTTGGGCG	33	GAAATGGGAGCAGAGCAGGTTT	22	5	100	1e-08	MIMAT0020564 Oryza sativa miR5076	NA
osa-miR5077	TGAGTTCACGTCGGGTTCACCAGACG	26	GTTCACGTCGGGTTCACCA	19	11	94.74	0.0001	MIMAT0020574 Oryza sativa miR5077	NA
osa-miR5078	TGTCGTTCGACCGTGGAATTTCTCC	25	TCGTTCGACCGTGGAATTT	21	3	94.74	0.0001	MIMAT0020575 Oryza sativa miR5078	NA
osa-miR5079a	CAGCTTGGATCTGTTATTTTGGTATCGTTC	30	TTGGATCTGTTATTTTGGTAT	22	7	100	4e-08	MIMAT0020578 Oryza sativa miR5079a	MIR5079
osa-miR5080	GCCTAAGCAAAAGGATCGTACCGTGACGACTGT	33	AAAAGGATCGTACCGTGAC	21	1	94.74	0.0002	MIMAT0020579 Oryza sativa miR5080	NA
osa-miR5082	ATCTGCGATGATGGCCGCGCGGGTTCAATAC	31	TGCGATGATGGCCGCGCGGGTTCA	24	4	100	6e-10	MIMAT0020582 Oryza sativa miR5082	NA
osa-miR5083	CAAAATTCAGACTACGATTATCTGATCAAAGTTC	34	AGACTACGATTATCTGATCA	20	11	95	4e-05	MIMAT0020583 Oryza sativa miR5083	NA
osa-miR5143b	AAATGTATGTTGGCAATGTAGGAAGTCTGCTAC	33	GTATGTTGGCAATGTAGGAA	24	7	100	2e-07	MIMAT0023289 Oryza sativa miR5143b	MIR5143
osa-miR5144-3p	TACACTCCTCAGCAGCACAAGAAGAATGT	29	CTCCTCAGCAGCACAAGAAG	21	1	100	1e-07	MIMAT0021089 Oryza sativa miR5144-3p	NA
osa-miR5144-5p	AATTTTCTTGTGCTGCTGAAGAGACGGCC	29	TTCTTGTGCTGCTGAAGAGAC	21	8	100	3e-08	MIMAT0021088 Oryza sativa miR5144-5p	NA
osa-miR5145	CACATAGCCCTCGAGGATCCAAACAGGTCCTC	32	TAGCCCTCGAGGATCCAAACAGGT	24	7	91.67	4e-05	MIMAT0021090 Oryza sativa miR5145	NA
osa-miR5146	ACCTATATTATAGGTGCCGGTTAATTAACAAACAGCCC	38	ATAGGTGCCGGTTAATTA	24	5	94.44	0.0007	MIMAT0021091 Oryza sativa miR5146	NA
osa-miR5147	CTGCTAACTTTTGTGGATGGAGGGAGTACCAC	32	AACTTTTGTGGATGGAGGG	21	9	94.74	0.0002	MIMAT0021092 Oryza sativa miR5147	NA
osa-miR5148b	TAGTATGAGGGGTAGAAATGTCATATCAGTCA	32	TGAGGGGTAGAAATGTCATATCA	24	6	100	3e-09	MIMAT0021095 Oryza sativa miR5148b	MIR5148
osa-miR5149	GCGTAGAGGGGCTGTGTCGATTTGGGACCTC	31	GAGGGGCTGTGTCGATTTGGGA	22	5	90.91	0.0006	MIMAT0021097 Oryza sativa miR5149	NA
osa-miR5150-3p	TGCAGAAGCTGCAGCTGTCAGAAGCTCCCTTC	32	AGAAGCTGCAGCTGTCAGAAGCTC	24	8	100	6e-10	MIMAT0021099 Oryza sativa miR5150-3p	NA
osa-miR5150-5p	TGCCAGCTTCTGACAGCTGCAGTTTCTCGCAC	32	AGCTTCTGACAGCTGCAGTTTCTC	24	8	100	6e-10	MIMAT0021098 Oryza sativa miR5150-5p	NA
osa-miR5151	GCCGATGTGGGTACGAATGAACAAAAATACCTT	33	GATGTGGGTACGAATGAA	22	5	100	3e-06	MIMAT0021100 Oryza sativa miR5151	NA
osa-miR5152-5p	ACGTATATCGACTTTAGGGATAGGCATGATCT	32	TAGGGATAGGCATGATCT	21	1	100	2e-06	MIMAT0021101 Oryza sativa miR5152-5p	NA
osa-miR5153	CATTATTATATGGATTCCACTTACACGTGGAT	32	TGGATTCCACTTACACGT	24	5	94.44	0.0006	MIMAT0021103 Oryza sativa miR5153	NA
osa-miR5154	CACACCAGTTGCCGTGGCGCTGAGGTGTGTCC	32	CACCAGTTGCCGTGGCGCTGAG	24	15	90.91	0.0006	MIMAT0021104 Oryza sativa miR5154	NA
osa-miR5156	TTTCAAAAGCCTGTAAAACTGCAAAAAGTTTT	32	AGCCTGTAAAACTGCAAAAAG	24	3	100	4e-08	MIMAT0021106 Oryza sativa miR5156	NA
osa-miR5157b-3p	TAGGAAGTTGTGGCTTACAAAAAGTGAGCAGC	32	GAAGTTGTGGCTTACAAAAAGT	24	5	90.91	0.0006	MIMAT0021110 Oryza sativa miR5157b-3p	MIR5157
osa-miR5158	CTATTGAGCCACTGGGATGAGGATGAATCATG	32	TGAGCCACTGGGATGAGGATGAAT	24	3	100	6e-10	MIMAT0021111 Oryza sativa miR5158	NA
osa-miR5159	CACTAACTAGAGTGGGTCAATGGGTACCGCGC	32	AACTAGAGTGGGTCAATGGGTACC	24	5	95.83	2e-07	MIMAT0021112 Oryza sativa miR5159	NA
osa-miR5160	GGAGGCGAGACCGATAGTATATTTCTGTAGTC	32	CGAGACCGATAGTATATTTCTG	22	7	90.91	0.0006	MIMAT0021113 Oryza sativa miR5160	MIR5160
osa-miR5161	CTATGCTTATATTCTGGATCAGAGGGAGTATAGCGA	36	TCTGGATCAGAGGGAGTATA	20	3	100	2e-07	MIMAT0021114 Oryza sativa miR5161	NA
osa-miR5162	CAAGTTTTATTAGGGGTATTTTAGTCATCGCC	32	TAGGGGTATTTTAGTCAT	24	6	94.44	0.0006	MIMAT0021115 Oryza sativa miR5162	NA
osa-miR5179	CTCTTTCGACGAGCTGCGCGGTCTTGAGCAAAGCGG	36	TGCGCGGTCTTGAGCAAA	21	3	100	3e-06	MIMAT0023306 Oryza sativa miR5179	MIR5179
osa-miR528-3p	GTCGCCTGTGCTTGCCTCTTCCATTGGTC	29	CCTGTGCTTGCCTCTTCCATT	21	8	100	3e-08	MIMAT0022926 Oryza sativa miR528-3p	MIR528
osa-miR528-5p	CAACTGGAAGGGGCATGCAGAGGAGCCCC	29	TGGAAGGGGCATGCAGAGGAG	21	18	100	3e-08	MIMAT0002884 Oryza sativa miR528-5p	MIR528
osa-miR529a	GGCCGCTGTACCCTCTCTCTTCTTCGGCG	29	CTGTACCCTCTCTCTTCTTC	20	12	100	1e-07	MIMAT0002885 Oryza sativa miR529a	MIR529
osa-miR529b	TCTCAGAAGAGAGAGAGTACAGCTTCCTGC	30	AGAAGAGAGAGAGTACAGCTT	21	7	100	4e-08	MIMAT0005015 Oryza sativa miR529b	MIR529
osa-miR530-3p	TGTCAGGTGCAGAGGCAGATGCAACATCC	29	AGGTGCAGAGGCAGATGCAAC	21	13	100	3e-08	MIMAT0002886 Oryza sativa miR530-3p	MIR530
osa-miR530-5p	CATATGCATTTGCACCTGCACCTACCTTG	29	TGCATTTGCACCTGCACCTA	20	8	100	1e-07	MIMAT0006787 Oryza sativa miR530-5p	MIR530
osa-miR5337a	AAAGTAAACGACCTAGAAAGACAAGTAATTC	31	CTAGAAAGACAAGTAATT	21	6	94.44	0.0006	MIMAT0021410 Oryza sativa miR5337a	NA
osa-miR5337b	AAACATCAAGAACGGGAAGCAATTTGTCTTGCG	33	AGAACGGGAAGCAATTTG	21	6	94.44	0.0006	MIMAT0024870 Oryza sativa miR5337b	NA
osa-miR5340	CAAATGATGACGTGGATGAATTTCAACCAC	30	TGATGACGTGGATGAATTTCAA	23	6	100	9e-09	MIMAT0021413 Oryza sativa miR5340	NA
osa-miR535-3p	CACCGTGCTTTCTCCCGTTGTCACTGATC	29	GTGCTTTCTCCCGTTGTCACT	21	4	100	3e-08	MIMAT0022927 Oryza sativa miR535-3p	MIR535
osa-miR535-5p	GAAGTGACAACGAGAGAGAGCACGCTGTC	29	TGACAACGAGAGAGAGCACGC	21	20	100	3e-08	MIMAT0003142 Oryza sativa miR535-5p	MIR535
osa-miR5485	AAATGACAACTGGTAGCAGAGCAATATCC	29	TGACAACTGGTAGCAGAGCAA	21	9	100	3e-08	MIMAT0022118 Oryza sativa miR5485	NA
osa-miR5486	TTGGTAGAATAAGCAAGCCAAACTAGAGATCC	32	TGGTAGAATAAGCAAGCC	21	4	94.44	0.0006	MIMAT0022119 Oryza sativa miR5486	NA
osa-miR5487	GTATAAAGATGTGCATGTAGTTCCGCATC	29	AAAGATGTGCATGTAGTTCCG	21	9	100	3e-08	MIMAT0022120 Oryza sativa miR5487	NA
osa-miR5488	TAATTGAAGGCGACTGATGATTTCAGCCG	29	TGAAGGCGACTGATGATTTCA	21	2	100	3e-08	MIMAT0022121 Oryza sativa miR5488	NA
osa-miR5489	GGGGAAACCATCGAGAACACCTGCAATTA	29	GGAAACCATCGAGAACACCTG	21	4	95.24	8e-06	MIMAT0022122 Oryza sativa miR5489	NA
osa-miR5490	TAACTTGGATTTTTATTTAGGACGGTATC	29	TTGGATTTTTATTTAGGACGG	21	4	100	3e-08	MIMAT0022123 Oryza sativa miR5490	NA
osa-miR5491	TCCTTGAAATGGAGGCTCGTTGTACCGTC	29	TGAAATGGAGGCTCGTTGTAC	21	7	100	3e-08	MIMAT0022124 Oryza sativa miR5491	NA
osa-miR5492	AGAACCAAGAGAAGAGAAGAAGAATAGATATG	32	AGAAGAAGAATAGATATG	21	3	94.44	0.0006	MIMAT0022125 Oryza sativa miR5492	NA
osa-miR5493	TAGCAGCCGGGCTCTGTCGCGCGTGCCTGTGCC	33	AGCCGGGCTCTGTCGCGCGTG	21	7	95.24	1e-05	MIMAT0022126 Oryza sativa miR5493	NA
osa-miR5495	TTAGAGAGGTCCGGATCGAACGTAGACCCT	30	AGAGGTCCGGATCGAACGTAG	21	4	100	4e-08	MIMAT0022128 Oryza sativa miR5495	NA
osa-miR5496	AAGCCCAGCCGGTGGCATAGTTCTCGCCC	29	CCAGCCGGTGGCATAGTTCTC	21	4	100	3e-08	MIMAT0022129 Oryza sativa miR5496	NA
osa-miR5497	GCGGCAGAATATCTGGGACGAGCATTCTG	29	CAGAATATCTGGGACGAGCAT	21	2	100	3e-08	MIMAT0022130 Oryza sativa miR5497	NA
osa-miR5498	ATGGTGGCTGAGCTGTAACACTTGAAGAGTTG	32	TGAGCTGTAACACTTGAAGA	21	3	100	2e-07	MIMAT0022131 Oryza sativa miR5498	NA
osa-miR5499	CTGCGAAGGAAGAATCGTTATGGAACTTC	29	GAAGGAAGAATCGTTATGGAA	21	5	100	3e-08	MIMAT0022132 Oryza sativa miR5499	NA
osa-miR5502	CCTATACGGATATGGATACGCGATACGAATCC	32	TACGGATATGGATACGCGATAC	22	9	95.45	2e-06	MIMAT0022135 Oryza sativa miR5502	NA
osa-miR5503	GCGCACAGCTCGAATTACTTCGGATCTTTCTAGAGGATCG	40	TTCGGATCTTTCTAGAGG	22	3	100	3e-06	MIMAT0022136 Oryza sativa miR5503	NA
osa-miR5503	TAGACCCAAAATGCCTCTAGAAAGATCAGACAGAGAC	37	AATGCCTCTAGAAAGATC	22	2	100	3e-06	MIMAT0022136 Oryza sativa miR5503	NA
osa-miR5504	GTATAGTGACGGGAGGACTGCACCTC	26	AGTGACGGGAGGACTGCA	21	3	100	2e-06	MIMAT0022137 Oryza sativa miR5504	NA
osa-miR5505	TGATGAGGATTCGGTATTGATCGCTAAAATGCGAGACCGT	40	GAGGATTCGGTATTGATCGCTA	22	5	100	1e-08	MIMAT0022138 Oryza sativa miR5505	NA
osa-miR5512b	AAACTAGGATATGGTAATGCTAAAAGTCC	29	TAGGATATGGTAATGCTAAAA	21	8	100	3e-08	MIMAT0024872 Oryza sativa miR5512b	MIR5512
osa-miR5513	TAAGTAACAAAGGACAACAGACTGACTAC	29	TAACAAAGGACAACAGACTGA	21	8	100	3e-08	MIMAT0022146 Oryza sativa miR5513	NA
osa-miR5514	GGCATCCCAGAGCTTTGGCTGTCGCCTCC	29	TCCCAGAGCTTTGGCTGTCGC	21	2	95.24	8e-06	MIMAT0022148 Oryza sativa miR5514	NA
osa-miR5515	CGGGCCTGTAGAGCAACCATCGGCCGTTG	29	CCTGTAGAGCAACCATCGG	21	4	94.74	0.0001	MIMAT0022149 Oryza sativa miR5515	NA
osa-miR5516b	GCACAGCCGACCGAAGCAATGAGTACCCC	29	CAGCCGACCGAAGCAATGAG	21	3	95	3e-05	MIMAT0023315 Oryza sativa miR5516b	MIR5516
osa-miR5517	GCCGTGCATCACGGCGCATATGTAGCTTC	29	TGCATCACGGCGCATATGTAG	21	4	100	3e-08	MIMAT0022151 Oryza sativa miR5517	NA
osa-miR5519	GGCTTGGCAGAAGTACTGGACTTAGGCCA	29	TGGCAGAAGTACTGGACTTAG	21	6	100	3e-08	MIMAT0022153 Oryza sativa miR5519	NA
osa-miR5521	ATGAAGTGGCTGCATATCTGATGAGTCGG	29	AGTGGCTGCATATCTGATGAG	21	3	100	3e-08	MIMAT0022155 Oryza sativa miR5521	NA
osa-miR5525	CCTTAAGTGAACCTTGGGAGCGATCTGAGGCG	32	TGAACCTTGGGAGCGATCTGA	22	2	100	4e-08	MIMAT0022160 Oryza sativa miR5525	NA
osa-miR5526	TACCATAAAGGTAGAGTCAGGCATGAGCTGAC	32	AAAGGTAGAGTCAGGCATGAG	21	7	95.24	1e-05	MIMAT0022161 Oryza sativa miR5526	NA
osa-miR5527	TGTTTTACTGCCCTGGCTGAGAACTCCTC	29	TTACTGCCCTGGCTGAGA	21	3	100	2e-06	MIMAT0022162 Oryza sativa miR5527	NA
osa-miR5528	GAATAAGACGGTTTTGGATGTTGCTTACCACT	32	AAGACGGTTTTGGATGTTGC	21	1	95	4e-05	MIMAT0022163 Oryza sativa miR5528	NA
osa-miR5532	AGAGTGGAATATATGACAAAGG	22	TGGAATATATGACAAAGG	22	4	100	1e-06	MIMAT0022167 Oryza sativa miR5532	NA
osa-miR5534a	CATCATCGACGATAACAGCTAGAATGGCGTAC	32	GACGATAACAGCTAGAATGG	21	10	95	4e-05	MIMAT0022169 Oryza sativa miR5534a	MIR5534
osa-miR5534b	CAATTGACAACAGCTAGAATGGGTC	25	TGACAACAGCTAGAATGG	21	6	100	2e-06	MIMAT0022170 Oryza sativa miR5534b	MIR5534
osa-miR5536	GTCAAATGATAGTGACATTATGGTAGAATTC	31	AATGATAGTGACATTATGGTAG	22	7	95.45	2e-06	MIMAT0022172 Oryza sativa miR5536	NA
osa-miR5538	ATAGTAACGGCAGCAAGTGATTGAGTTCAGTAGTTTCT	38	GCAGCAAGTGATTGAGTTCAGT	22	2	100	1e-08	MIMAT0022174 Oryza sativa miR5538	NA
osa-miR5539b	TATCGAAAACGGATGCGCGTGCTAACTCTC	30	GAAAACGGATGCGCGTGCTA	22	4	100	1e-07	MIMAT0031377 Oryza sativa miR5539b	MIR5539
osa-miR5540	AGCTATACTGTCGATCTCGCACAACGAC	28	TATACTGTCGATCTCGCACAA	21	10	95.24	8e-06	MIMAT0022176 Oryza sativa miR5540	MIR5160
osa-miR5542	CTCAACCTCATGATACCTCCTCAAGGAAGGG	31	CTCATGATACCTCCTCAA	21	6	94.44	0.0006	MIMAT0022178 Oryza sativa miR5542	NA
osa-miR5788	ATGCAATACCGGATGTGACATATTCTAGTGTC	32	GGATGTGACATATTCTAGT	21	9	94.74	0.0002	MIMAT0023253 Oryza sativa miR5788	NA
osa-miR5791	AAACTTGCAGGAGACTAGAGACCAGCTAC	29	TTGCAGGAGACTAGAGACCAG	21	8	100	3e-08	MIMAT0023258 Oryza sativa miR5791	NA
osa-miR5792	CAATGATGACAGCGGTGGTTCGGACATCCGTC	32	GATGACAGCGGTGGTTCGGACATC	24	9	100	6e-10	MIMAT0023259 Oryza sativa miR5792	NA
osa-miR5793	CCCACGAGGACGAGATACAGTGCAGGGTC	29	CGAGGACGAGATACAGTGCAG	21	7	100	3e-08	MIMAT0023260 Oryza sativa miR5793	NA
osa-miR5794	ACAATGAGGAATCACTAGTAGTCGTCCTC	29	TGAGGAATCACTAGTAGTCGT	21	13	100	3e-08	MIMAT0023261 Oryza sativa miR5794	NA
osa-miR5796	CTGGTCATTCAGGATTGAAGCCGCCGTGC	29	TCATTCAGGATTGAAGCCGCC	21	5	100	3e-08	MIMAT0023264 Oryza sativa miR5796	NA
osa-miR5797	TTCCTCGTGGGATTTATGCAGTTAACATC	29	TCGTGGGATTTATGCAGTTAA	21	8	100	3e-08	MIMAT0023265 Oryza sativa miR5797	NA
osa-miR5799	TTTTGTCCAACGTTTGACTATTCGTCTTCTCC	32	GTCCAACGTTTGACTATTCGTCTT	24	5	95.83	2e-07	MIMAT0023268 Oryza sativa miR5799	NA
osa-miR5800	CGTGAGCCGTTCCGATAGCCGGGATGGCG	29	AGCCGTTCCGATAGCCGGG	21	2	100	5e-07	MIMAT0023269 Oryza sativa miR5800	NA
osa-miR5801a	ACTGATCGTTTTCGATCGTTGGATCTAGCGGT	32	ATCGTTTTCGATCGTTGGA	24	6	100	6e-07	MIMAT0023270 Oryza sativa miR5801a	NA
osa-miR5801b	TTTAAAATCGTTTCTAATCGTTGGATCTTCAC	32	AAATCGTTTCTAATCGTTGGA	24	4	95.24	1e-05	MIMAT0023280 Oryza sativa miR5801b	NA
osa-miR5801c-3p	CACGATCGTTTTCGATTGTTGGATCTAAAATG	32	CGTTTTCGATTGTTGGATCTA	21	4	100	4e-08	MIMAT0044647 Oryza sativa miR5801c-3p	NA
osa-miR5801c-3p	CATGATCGTTTTCGATTTTTGGATCAGTGTCG	32	CGTTTTCGATTTTTGGATC	21	1	94.74	0.0002	MIMAT0044647 Oryza sativa miR5801c-3p	NA
osa-miR5801c-5p	GTTAAGATCCAACGATCGGAAACGACTTCTAC	32	GATCCAACGATCGGAAACGA	21	7	100	2e-07	MIMAT0044646 Oryza sativa miR5801c-5p	NA
osa-miR5802	ACGAATGGACTGTATTTTGTAAAGCGGAGTCC	32	ATGGACTGTATTTTGTAAAGCGGA	24	9	95.83	2e-07	MIMAT0023271 Oryza sativa miR5802	NA
osa-miR5803	CTCAGGACGTAGACGCTACGCGTGAGCCGTCC	32	GTAGACGCTACGCGTGAG	24	8	94.44	0.0006	MIMAT0023274 Oryza sativa miR5803	NA
osa-miR5806	CTACACAGGCAAAGACAATGACGGCGATC	29	ACAGGCAAAGACAATGACGGC	21	9	100	3e-08	MIMAT0023277 Oryza sativa miR5806	NA
osa-miR5809	AAATCTCGTCGCCGGCGACCACAGCCGGC	29	TCGTCGCCGGCGACCACAGC	20	9	100	1e-07	MIMAT0023281 Oryza sativa miR5809	NA
osa-miR5810	GCCAAAAATGCCATCGCCGTTAGGGTTCCCCC	32	ATGCCATCGCCGTTAGGGTTCC	24	6	95.45	2e-06	MIMAT0023282 Oryza sativa miR5810	NA
osa-miR5811	CTTTAACCTAGGACTTAGATGGGACATAGTCC	32	TAACCTAGGACTTAGATGGGAC	24	6	90.91	0.0006	MIMAT0023283 Oryza sativa miR5811	NA
osa-miR5812	ATTAATGTTGCCACAATTGTAAAATCGTTGAC	32	TGCCACAATTGTAAAATCGTTG	24	5	90.91	0.0006	MIMAT0023284 Oryza sativa miR5812	NA
osa-miR5812	TAGCATGTTGCCACAATCTTAAAATCGTGGCT	32	TGCCACAATCTTAAAATCGT	24	2	100	2e-07	MIMAT0023284 Oryza sativa miR5812	NA
osa-miR5813	CAACAAGCAGCGACTCTGGTCATGGAGCTC	30	AAGCAGCGACTCTGGTCATGGA	22	4	100	9e-09	MIMAT0023285 Oryza sativa miR5813	NA
osa-miR5814	TTGCAATCAAGTTAGGAACCATGCAAGAGCC	31	AATCAAGTTAGGAACCATGCAAG	24	6	100	2e-09	MIMAT0023286 Oryza sativa miR5814	NA
osa-miR5815	GCTTAATGCTATGGACACTAGAAGACATGTCC	32	AATGCTATGGACACTAGAAGACAT	24	11	91.67	4e-05	MIMAT0023287 Oryza sativa miR5815	NA
osa-miR5816	CTACTAGGAGTGTTTGTAGGAGTGCCACCTCC	32	TAGGAGTGTTTGTAGGAGTGCCAC	24	9	95.83	2e-07	MIMAT0023288 Oryza sativa miR5816	NA
osa-miR5817	CCTTATCGAATTTGGAAGAAAAAGGTCTTCTC	32	ATCGAATTTGGAAGAAAAAGGT	24	4	95.45	2e-06	MIMAT0023290 Oryza sativa miR5817	NA
osa-miR5819	CGTACGACGGCGACGACGGGAACGGCGGCGTC	32	GACGACGGGAACGGCGGCG	21	5	94.74	0.0002	MIMAT0023292 Oryza sativa miR5819	NA
osa-miR5820	CCAATGGCTGAGATTGATCGAGGAAGTCG	29	TGGCTGAGATTGATCGAGGAA	21	2	95.24	8e-06	MIMAT0023293 Oryza sativa miR5820	NA
osa-miR5824	AAATTTGACGCCATTGACTTTTTATCGTCG	30	ACGCCATTGACTTTTTATC	24	6	94.74	0.0001	MIMAT0023297 Oryza sativa miR5824	MIR806
osa-miR5825	AGGCAAAACATCTGATAACCTGAAACGGCCAC	32	AAAACATCTGATAACCTGAAACGG	24	14	100	6e-10	MIMAT0023299 Oryza sativa miR5825	NA
osa-miR5827	TATAATTGTTGCAGTTTGGACTACCGTAATAC	32	TTGTTGCAGTTTGGACTACC	21	7	95	4e-05	MIMAT0023301 Oryza sativa miR5827	NA
osa-miR5833	GGCCTGAGCCCGATGAGCCCGAGGAGGATGCA	32	GCCCGATGAGCCCGAGGAGGA	21	1	100	4e-08	MIMAT0023308 Oryza sativa miR5833	NA
osa-miR5836	AAAATGAGCAGCCGGACCATGGGATGGCG	29	TGAGCAGCCGGACCATGGGAT	21	5	100	3e-08	MIMAT0023312 Oryza sativa miR5836	NA
osa-miR6245	TATTACATTAAATAGGTGTCGGCACTATTTAC	32	ATAGGTGTCGGCACTATT	21	5	94.44	0.0006	MIMAT0024865 Oryza sativa miR6245	NA
osa-miR6245b-3p	GGGTATAGAACCGACACATATACTTGTAATAC	32	ATAGAACCGACACATATAC	21	8	94.74	0.0002	MIMAT0044649 Oryza sativa miR6245b-3p	NA
osa-miR6245b-5p	TAGGTGTCGGTTCTATTAAAAAACCCATC	29	TAGGTGTCGGTTCTATTAAA	21	4	100	1e-07	MIMAT0044648 Oryza sativa miR6245b-5p	NA
osa-miR6246	ATAGTTGGGGATTTCCTGCCGGAGGAACCCC	31	TTGGGGATTTCCTGCCGGAGGAA	23	1	100	2e-09	MIMAT0024867 Oryza sativa miR6246	NA
osa-miR6248	TTTGCAAATATTTTAGGATGGAGGTAGTGCCC	32	TATTTTAGGATGGAGGTAGT	21	5	95	4e-05	MIMAT0024869 Oryza sativa miR6248	NA
osa-miR6249b	ACCCCGCCGGCGAGCTCTTCACGCGGCCG	29	CCGCCGGCGAGCTCTTCACG	21	5	100	1e-07	MIMAT0031378 Oryza sativa miR6249b	NA
osa-miR6250	CATGAGGGGATAGATCGACGCGTCAAGAACCCC	33	GGGGATAGATCGACGCGTCAAG	22	8	100	1e-08	MIMAT0024873 Oryza sativa miR6250	NA
osa-miR6252	AACATTCGTTGTATTAGGAGTGGGTTACTAC	31	ATTCGTTGTATTAGGAGTGGGTT	23	5	91.3	0.0001	MIMAT0024875 Oryza sativa miR6252	NA
osa-miR6253	CTCCTCAATTAGAGGAAAGTGGGCAGTTGTTTG	33	GAGGAAAGTGGGCAGTTG	22	5	100	3e-06	MIMAT0024876 Oryza sativa miR6253	NA
osa-miR6255	CCGGCCAGTTTTGGGAAAAATGGGCAGTTGAGTTTCTC	38	TGGGAAAAATGGGCAGTTGAGT	22	5	100	1e-08	MIMAT0024878 Oryza sativa miR6255	NA
osa-miR7692-3p	GCACATGACTTAGCATGCTCACGTGGCGGCC	31	TGACTTAGCATGCTCACGTGGC	24	5	90.91	0.0006	MIMAT0029956 Oryza sativa miR7692-3p	NA
osa-miR7693-5p	GGAACCGGCTCTCGCATCGATGAAGAACGGAAC	33	CATCGATGAAGAACGGAA	24	6	94.44	0.0006	MIMAT0029957 Oryza sativa miR7693-5p	NA
osa-miR7694-5p	TAAGAGACCTAAAACTAATCCAATACTAGGTC	32	ACTAATCCAATACTAGGT	24	12	94.44	0.0006	MIMAT0029959 Oryza sativa miR7694-5p	NA
osa-miR7695-3p	CACGCGTGACGTGCCACGTAGGCAAGACGGT	31	CGTGACGTGCCACGTAGGCA	21	4	95	4e-05	MIMAT0029962 Oryza sativa miR7695-3p	NA
osa-miR7695-5p	AGATCCATCTGGCGTGCCACGTAGGCAAGCCG	32	TGGCGTGCCACGTAGGCA	24	1	94.44	0.0006	MIMAT0029961 Oryza sativa miR7695-5p	NA
osa-miR810a	GGCCACATGTGGTGAGCTTATGATGCTCA	29	CCACATGTGGTGAGCTTATGA	21	8	95.24	8e-06	MIMAT0004045 Oryza sativa miR810a	MIR810
osa-miR810b.1	TGTGATAGTGAACACAGATATGCGTCATCGCC	32	TGAACACAGATATGCGTCATC	21	7	95.24	1e-05	MIMAT0005977 Oryza sativa miR810b.1	MIR810
osa-miR810b.2	TAACAACGGCATAATTAGATCACTTGATTGGC	32	AACGGCATAATTAGATCACTT	21	13	95.24	1e-05	MIMAT0005978 Oryza sativa miR810b.2	MIR810
osa-miR812e	AGCTCGTGTCCAACGCTTGACCGTCCGTCACTG	33	GTCCAACGCTTGACCGTCCGTC	22	8	90.91	0.0006	MIMAT0004053 Oryza sativa miR812e	MIR812
osa-miR812f	GATACGGACGATCAAAGTTGGACACGAAGTCC	32	ACGGACGATCAAAGTTGGACACG	24	6	91.3	0.0002	MIMAT0007821 Oryza sativa miR812f	MIR812
osa-miR812g	ATAAAGACAGATGATTAAAGTTGGACACTCATC	33	AAGACAGATGATTAAAGTTGGACA	24	7	95.83	2e-07	MIMAT0007847 Oryza sativa miR812g	MIR812
osa-miR812k	AGTTACGAACGGTTAAAGTTGGACGCGGCTGC	32	ACGAACGGTTAAAGTTGGACGCGG	24	7	100	6e-10	MIMAT0019666 Oryza sativa miR812k	MIR812
osa-miR812n-3p	TAGAACGGAAAATCATGGCTGCACTTAACCCT	32	ACGGAAAATCATGGCTGCACTTAA	24	4	100	6e-10	MIMAT0019680 Oryza sativa miR812n-3p	MIR812
osa-miR812n-5p	ATTCACGGAAACTTATGGTTGCACTTAATCCGT	33	CACGGAAACTTATGGTTGCACTT	24	4	91.3	0.0002	MIMAT0019679 Oryza sativa miR812n-5p	MIR812
osa-miR812o-3p	AACAACGGTCAAACGTTGGACACGGATTCGTTT	33	AACGGTCAAACGTTGGACACGGA	24	6	91.3	0.0002	MIMAT0019682 Oryza sativa miR812o-3p	MIR812
osa-miR812o-5p	AACTGGACAGTCAAACGTTGGACACGGAGTCC	32	GACAGTCAAACGTTGGACACG	21	10	95.24	1e-05	MIMAT0019681 Oryza sativa miR812o-5p	MIR812
osa-miR812p	TTCCATAAGACGGACGATTAAAGTTGGGCATC	32	GACGGACGATTAAAGTTGGGCAT	24	4	100	3e-09	MIMAT0023254 Oryza sativa miR812p	MIR812
osa-miR812q	ACCGACGTTGGGCACGAATATCTACGGCGCTC	32	ACGTTGGGCACGAATATCTACGGC	24	11	95.83	2e-07	MIMAT0023255 Oryza sativa miR812q	MIR812
osa-miR812r	GGCTAACGTTAGACACGAATTTCCACGGTTAC	32	ACGTTAGACACGAATTTCCACGG	24	8	95.65	6e-07	MIMAT0023262 Oryza sativa miR812r	MIR812
osa-miR812s	CATAAGATGGACAGTCAAACGTTGGACAGTTC	32	AAGATGGACAGTCAAACGTTGGAC	24	7	91.67	4e-05	MIMAT0023267 Oryza sativa miR812s	MIR812
osa-miR812v	CGCCATGGCTGCACTTATAATGGGACGGGC	30	ATGGCTGCACTTATAATGGGACGG	24	6	95.83	1e-07	MIMAT0023278 Oryza sativa miR812v	MIR812
osa-miR814c	GTATAGACACTTCATAGTACAACGAATCTCTA	32	CACTTCATAGTACAACGAATCT	22	10	100	1e-08	MIMAT0004057 Oryza sativa miR814c	MIR814
osa-miR814c	ATATGTCCAGATTCGTTGTACTATGAAGTGTAA	33	AGATTCGTTGTACTATGAAGTG	22	2	100	1e-08	MIMAT0004057 Oryza sativa miR814c	MIR814
osa-miR815a	CCAGGAAGGGGATTGAGGAGATTGGGGACCCC	32	AAGGGGATTGAGGAGATTGGG	21	8	100	4e-08	MIMAT0004058 Oryza sativa miR815a	MIR815
osa-miR816	CTATTCGTTGTAGTAGAATATGTCACATCCTCC	33	GTTGTAGTAGAATATGTCAC	20	6	95	4e-05	MIMAT0004061 Oryza sativa miR816	NA
osa-miR817	AAGGGCCAACTTGAGACCCGATTGAGATACCCT	33	CCAACTTGAGACCCGATTGA	21	7	95	4e-05	MIMAT0004062 Oryza sativa miR817	NA
osa-miR818a	CATAATCCCTTATATTATGGAACGGAGTTTCC	32	AATCCCTTATATTATGGAACGG	22	12	95.45	2e-06	MIMAT0004063 Oryza sativa miR818a	MIR818
osa-miR818f	CACGGGGAGTATGTAGGATGGCCATTCCC	29	GGGAGTATGTAGGATGGCCAT	21	4	95.24	8e-06	MIMAT0026335 Oryza sativa miR818f	MIR806
osa-miR820c	TAAGTCGGCCTCGTGGATGGACCAGGAGCGCC	32	TCGGCCTCGTGGATGGACCAG	21	67	100	4e-08	MIMAT0004081 Oryza sativa miR820c	MIR820
osa-miR827	GCTATTAGATGACCATCAGCAAACATGAC	29	TTAGATGACCATCAGCAAACA	21	9	100	3e-08	MIMAT0009981 Oryza sativa miR827	MIR827

## Sheet: Table S3
Supplementary Table S3. Major criteria using Bowtie and Mireap_0.22b for novel miRNA prediction
mireap Parameters taken for Identification of novel miR	Cutoff Values
Minimal miRNA length	18
Maximal miRNA length	26
Minimal miRNA (reference) length	20
Maximal miRNA (reference) length	24
Uniqueness of miRNA	20
Maximal energy (kcal / mol)	-18
Minimal space	5
Maximal space	35
Minimal mature pair	14
Maximal mature bulge (stem-loop)	4
Maximal duplex assymmetry	5
Flank sequence length	10

## Sheet: Table S4
Supplementary Table S4. List of novel miRNA obtained from SP rice panicles grown under sun or shade treatment. The novel miRNA that are shortlisted for secondary structure prediction are written in Bold letters
miRNA ID	Novel miR Sequence	Chromosome	Strand	MFE	Mature miRNA length	Read Count	Alignment to the genome Start	Alignment to the genome End	Mature miR Start	Mature miR End	Precursor Sequence
mireap-m0001-3p	CCACGGACGGCGCCAGGTGT	10	-	-26.9	20	11	3174073	3174173	3174083	3174102	CCTTTCGCCTAGGCACAACTCTCTCTTTCACGGTCTTTTTTGGTGGCATCTGTGGTTTTGCTCTGGGTTCCCCACGGACGGCGCCAGGTGTTGTCGAATGA
mireap-m0001-3p	CTACTTCCGTTGTAGTCTGTA	11	+	-29.9	21	5	16428905	16429038	16429008	16429028	CACACCCACCAATAGTCTACAAAGCCGGAGTACGTTGAGCCAAGTCGTCAGGAGATCTCGTCGAATACATCGACTATGATTTTGTCGGTATTATCAGTTCTGTCTACTTCCGTTGTAGTCTGTAGTTTTCCATA
mireap-m0001-3p	TCAATTGGCAGTTCTTAGGCA	11	+	-43.1	21	6	25746287	25746416	25746386	25746406	GGAGATCAGAAGCGGTGATGTTGCTAGCGACTGCCATAGGTTGACGAACAGGTTGGAGGGGTGTCCTTTGATCTTCCTTGGTCTTAGCTGGGACCACATTCAATTGGCAGTTCTTAGGCACATGATCTGT
mireap-m0001-5p	GCCAGAGAGGGCGCCACTGCCG	12	-	-36.24	22	6	22730956	22731042	22731011	22731032	GGCGCAGATTGCCAGAGAGGGCGCCACTGCCGCGAGAGCATCTGTGTGCAGGCGCCGTCCTTGGTAGGGAGGAGGGTGATGATGCCG
mireap-m0002-3p	CATCCAGTTGGTAGAGCATTTCC	11	-	-30.2	23	7	27920803	27920922	27920813	27920835	TCTTGTTCTGAAGGGAGTCTCGGCTTGCATGGATGAGTTGGTCTACATTGTTATCTGCATTGTACTGGACGTTGTTATAATTTTTTCCATCCAGTTGGTAGAGCATTTCCCAGAAAACTT
mireap-m0002-3p	CCACCGCTGCCACCAGTTCT	11	-	-63.7	20	6	9961362	9961514	9961372	9961391	CCACCGAGGGAGAAGCTTGGGGGTAGGGGGGGGGCGGAGAGGGGGTAGAGGACCGCTGGACCCGCTTGTCAGAAACACCACTGCCATCGCCTCCATTGGATCTGCCCGCGGGAGCCACCGACACCACCGCTGCCACCAGTTCTGCCACGGAAG
mireap-m0002-3p	GTAGTAGCAGCTAGATTAAT	2	+	-28.71	20	6	48378	48503	48474	48493	TATATAGGGAATTACTAGCATGCTAAATTGGTAATGCTAGCTAAATTGGTAGTATATAATTAAGCTATAGGTGGGAGATAGCAATGCAAGTAGACAGTAGTAGCAGCTAGATTAATTAATTAGAAG
mireap-m0002-5p	CAACAGCTGTCATTTTGTCCA	3	-	-37.3	21	5	854787	854923	854893	854913	GATATTGCGGCAACAGCTGTCATTTTGTCCAGTAAAATTTCTGCTGGGGTCTCAGTTGGAGAGGATTCATTGGTCTATGATTCATCACTTTCAGGTAGAATTAGGATTGGCTCACAATGTATTGTTGTTGGGGTGAA
mireap-m0003-5p	AGCCGCCTGGGCGTCTCGCTACT	1	+	-51.5	23	5	9404191	9404349	9404201	9404223	GCGGAACTCGAGCCGCCTGGGCGTCTCGCTACTCGCTAGAGGGCGATATGATGCATCTCCCCGGCATCTGCTGTGACTGTTGATTCATCTTCTCTCTTCCTACTGGCTTGGAGACTTCAATTCGGTGTAGACGGGATCGCCATGCATCTTCGTTTCGTT
mireap-m0003-5p	ACGTCATCGTGGTCGCCAAGTCG	12	-	-29.8	23	6	6409397	6409499	6409467	6409489	CTCGGGAAGGACGTCATCGTGGTCGCCAAGTCGTCGCCGTCCTCGTCCGCCGCTTCGCCATCGTCGGAGACCGCCGGAGCATCATCGCCGTCGTCAAGCCGAA
mireap-m0003-5p	GGCCCATGGGCCACCAAGCCC	3	-	-29.9	21	5	13630373	13630442	13630412	13630432	TTTATCGTGTGGCCCATGGGCCACCAAGCCCGTGTTGTATCGGGCCTGAAGCCCATGAGTCCGTGACGGC
mireap-m0003-5p	GCGCACAACGGAACCACACC	2	+	-23.5	20	5	23596101	23596197	23596111	23596130	TTGTCGCTAGGCGCACAACGGAACCACACCACCCAACACCAGCAACGCTAGACAATCGAACAGAGACGTGTGTTTCCGTTTGTCATCCCAGCTTTGA
mireap-m0004-3p	AAGATCCGTTGTAGTCTAGCTGG	1	-	-39.8	23	12	35801556	35801723	35801566	35801588	AGGTGGCAGTGAAACCATGCTGAATTATTGTGGATATAGGGAGCAGAGCACTTATCAGTATCTCTTTTCCAGGATATTTAGGGTTTCGTTTGGAGAAACAAAGGGAAATATAAGCTTGGCAGTTCGTTATCAAACAAGATCCGTTGTAGTCTAGCTGGTTAGGATACT
mireap-m0004-3p	CCGGTGGGACCTTTTTTTTT	3	-	-30.9	20	14	35218750	35218863	35218760	35218779	TTAGTTAAGAAAATGAAGTAAAATGGTTCCATAGTGTAGTGGTTAGCACTCCAGACTTTGAATCTGGCGACCTGGGTTCGAATCCCGGTGGGACCTTTTTTTTTAGTTTTACTA
mireap-m0004-3p	CCGCCTCGAAGCTCCCTGCGC	2	+	-61.3	21	5	26262779	26262872	26262842	26262862	GGCGAGGCGACGCCAGGGAGCCAGCGAGGCAGCGACGTGCCTCCAGGCCGCGCGCCGCCGTCGCCGCCTCGAAGCTCCCTGCGCCGCCGTCGTA
mireap-m0004-5p	CTAGGCACGGATTCGAGGAGA	1	-	-40.81	21	6	13618634	13618761	13618731	13618751	TCTGATCTCGCTAGGCACGGATTCGAGGAGAAAGAGTACCCTGTTGTCGACTACAAGTCGGACCTTCTGACCGCCATGTCGACAACAGTTAGATAGGCTACCCCAAATATTGTACTGGTGTGATTATG
mireap-m0005-3p	CCCACTTCTGTCACCTTCGT	2	+	-62.4	20	5	34182975	34183128	34183099	34183118	CCCGTGAACCTGCGACGGGATGGGTGGGGATGGATCAGCGCCTCGACTGCTCCTTGGCCGACGACAGCCGCTGCCCTGACGACGTCCTTAGCCCTCGTCGGCGGCCGCCGTTCCGCCTCCATCACCCACTTCTGTCACCTTCGTCCGCGCGCGG
mireap-m0005-3p	GCGGCGTGTTGCATGCCTGCATG	1	-	-34.1	23	9	39508306	39508385	39508316	39508338	GCGAGCGCGACGCAAGCGGCGGCGGCAAGCGTGAGCGGCGAGGTTGAGCGGCGTGTTGCATGCCTGCATGCGACGCTTAA
mireap-m0005-5p	CTAATTGATAACTTTGAATTTC	4	+	-21.1	22	7	3470827	3470958	3470837	3470858	TCATATGTTACTAATTGATAACTTTGAATTTCGTTATTAAATAAATAAAATAAAATACTAACTTAAGAGTTCAAGATGGATACAACTGCTTATTTATTAACGAAATATAGATACATCGATTTCGACTAAAGA
mireap-m0005-5p	AATTTCCGTAGTAGTCTAACTCA	2	-	-26.3	23	10	1502986	1503099	1503067	1503089	ACAACTGAGAAATTTCCGTAGTAGTCTAACTCAATTATATCAAGTATCCTTCCGTAATACATGATATCACCAAGGACAGGGTTAGTATCACTGGCGGACGTGTAGCTCGATGTT
mireap-m0006-3p	AGATTATAGAGTTTAAATCCCT	3	-	-22.06	22	6	25076942	25077084	25076952	25076973	TTCTGTGTAGAGTTTAAATCTATAGATTTAACAACAAAGTTATCATAAAACTATAAATTTAAAACTAAGTATTATAAGACTACAGATTTAGTATTGAAGTTATCAAAAAATAGATTATAGAGTTTAAATCCCTAACACTAGAG
mireap-m0006-3p	TGTGTTTGTATGGTTAGCTGTG	2	-	-29.6	22	7	26293093	26293188	26293103	26293124	AGGCCCGATGACAATTGGCCATGCACTACGGTGCCGGTTTGGTGCTAAGCCATTCTTAGTGATATGTGTTTGTATGGTTAGCTGTGGTTATTGGTC
mireap-m0006-3p	CCGGTGGGACCTTTTTTTTC	4	-	-29.2	20	18	35336103	35336212	35336113	35336132	CACAGGCAATGAACAAGATCGGTTCCATGGTGTAGTGGTTAGCACTCCAGACTTTGAATCTGGCGACCTGGGTTCGAATCCCGGTGGGACCTTTTTTTTCACTATTCTTT
mireap-m0006-5p	TAGTATCCGACTGTTTATGTCG	2	-	-25	22	9	27446308	27446448	27446417	27446438	ACTTCCATGTTAGTATCCGACTGTTTATGTCGATCATATTATGGCCACGCGCGTTAATACGTTATAATTGCACAATTGAGAAGCTTATATACCTATCTAGCTAGATTATTTTTATAAAGATAGTTAGGAATTAAAGGAGGC
mireap-m0007-3p	CCGGTGGGACCTTTTTTTTTA	3	-	-31.8	21	19	35218749	35218864	35218759	35218779	TTTAGTTAAGAAAATGAAGTAAAATGGTTCCATAGTGTAGTGGTTAGCACTCCAGACTTTGAATCTGGCGACCTGGGTTCGAATCCCGGTGGGACCTTTTTTTTTAGTTTTACTAA
mireap-m0007-5p	CTCACGCACCTCCACCACCTCC	3	-	-50.6	22	6	31597733	31597880	31597849	31597870	CCTCCCTGTACTCACGCACCTCCACCACCTCCATCTCTCTCGCTCCCTCAAACGTCGTCGGCACAGGCACAACCATGTATATATGCCCGGTGATTGGCACAGAGTAGATGCAAGGCGCAACGGATGTGGGGAGAGGGGAGTAGGGAGA
mireap-m0007-5p	ACAGTGTTGCATCCCTGCTAG	2	-	-36.8	21	10	34340582	34340712	34340682	34340702	GGCACTTTTAACAGTGTTGCATCCCTGCTAGGTTTTCTCAAGAGAAGTTATGGTACCTTGATCAGATGTTCAAGGTTTTATCCTTGGTAAGTACCAAAGTACAGTAGGGCATTTCACATCTGAAAAGTGTG
mireap-m0007-5p	CGCCGCCGGCGGGGGCAGCGG	5	-	-75.3	21	5	25266696	25266808	25266778	25266798	TCCTCCCCGCCGCCGCCGGCGGGGGCAGCGGCCTTGACGGCCACCACGCGGCAGCAGCGGCGCGGGAAGGACCCGTCGACGCGGAACTCGCCGGCGGCGCCGGGGGCGAGGAG
mireap-m0008-3p	CCGGTGGGACCTTTTTTTTC	4	-	-29.2	20	15	35336103	35336212	35336113	35336132	CACAGGCAATGAACAAGATCGGTTCCATGGTGTAGTGGTTAGCACTCCAGACTTTGAATCTGGCGACCTGGGTTCGAATCCCGGTGGGACCTTTTTTTTCACTATTCTTT
mireap-m0008-5p	CAACAGCTGTCATTTTGTCCA	3	-	-37.3	21	6	854787	854923	854893	854913	GATATTGCGGCAACAGCTGTCATTTTGTCCAGTAAAATTTCTGCTGGGGTCTCAGTTGGAGAGGATTCATTGGTCTATGATTCATCACTTTCAGGTAGAATTAGGATTGGCTCACAATGTATTGTTGTTGGGGTGAA
mireap-m0008-5p	CGCCGCCGGCGGGGGCCTTCCGC	6	-	-48.7	23	7	20169402	20169478	20169446	20169468	AGCTTGCCGCCGCCGCCGGCGGGGGCCTTCCGCGGCGGCATGTCGGGATCGGAGTTGGCGGCGGCGGCGGAGGGTTG
mireap-m0008-5p	CCACGGACGGCGCCACCGCC	4	-	-56.02	20	6	26253879	26253981	26253952	26253971	AACGCCTGCTCCACGGACGGCGCCACCGCCTCCGCCTCCTCCTCCTCCTCCCCCGCATTGCCGCGGGCGGCGGCGGTGGTGTTGCGGCGGCGGAGGAGGCCGC
mireap-m0009-3p	TAAATCCGTTGTAGTCTAGCT	7	-	-24.4	21	6	8202740	8202859	8202750	8202770	AATCCGAGTCCGTGAAAGAAAGCAGTGGATTTTTGTTCTTGTGCTGTTATAGTTAATTTGTAAAAATATTTGTATTTTGAAACCTTTCATAAATCCGTTGTAGTCTAGCTGGTTAGGATA
mireap-m0009-3p	AGATTATAGAGTTTAAATCCCT	3	-	-22.06	22	5	25076942	25077084	25076952	25076973	TTCTGTGTAGAGTTTAAATCTATAGATTTAACAACAAAGTTATCATAAAACTATAAATTTAAAACTAAGTATTATAAGACTACAGATTTAGTATTGAAGTTATCAAAAAATAGATTATAGAGTTTAAATCCCTAACACTAGAG
mireap-m0009-3p	CTTTGGGGGATGTGGCAGCA	9	+	-35.45	20	5	19957819	19957963	19957934	19957953	ATTACTTGCTTTTTTTTCCTTCCTGACTTTCATGTTCCTTGCAAGACTCTGAAGAGCAATGGCTTCTGTCAAGGTGCAATAAATAACCAAGCTAACCTTGTTCTGTTAGCTTTTGCTTTGGGGGATGTGGCAGCATGGCATGTGA
mireap-m0009-3p	CCGGTGGGACCTTTTTTTTC	4	-	-29.2	20	9	35336103	35336212	35336113	35336132	CACAGGCAATGAACAAGATCGGTTCCATGGTGTAGTGGTTAGCACTCCAGACTTTGAATCTGGCGACCTGGGTTCGAATCCCGGTGGGACCTTTTTTTTCACTATTCTTT
mireap-m0010-3p	CCGGTGGGACCTTTTTTTTTA	3	-	-31.8	21	7	35218749	35218864	35218759	35218779	TTTAGTTAAGAAAATGAAGTAAAATGGTTCCATAGTGTAGTGGTTAGCACTCCAGACTTTGAATCTGGCGACCTGGGTTCGAATCCCGGTGGGACCTTTTTTTTTAGTTTTACTAA
mireap-m0010-5p	AAAGTATCAAGTTTAAATTCAT	9	-	-23.6	22	6	4373808	4373961	4373930	4373951	ACCTATGTATAAAGTATCAAGTTTAAATTCATTATACAAAGAAAGAGAAGAAAGATAAAAATTTTGACAGCTTCATAATCTTAAAACTTAGAGCTATAAGATTTTCTACAACTAAAATATAATAAATTTAAAGTTAAGACTTTATAAATATGTA
mireap-m0010-5p	ATAGATATCGAGTTTAATAC	8	+	-26.8	20	5	14098807	14098893	14098817	14098836	CTTGATGCTCATAGATATCGAGTTTAATACTACCTAGTAGCACCTCATACTAATAGGTATTAGGTCTGGTACTGTGCATGTATCATG
mireap-m0011-3p	CGCGCCTACGGCGAGGGCGTGC	4	+	-78	22	5	25307740	25307883	25307852	25307873	GGCGGGGGACGGTCGGTACGCGCGCCACGTCGGCGCGAGGACCGGCCTCGCGTTCCTCAACAGCAACGTGCTGAGCCAGTGCGCCGTCCCGCGCCGCGGCGCCTGCTTCTGCCGCGCCTACGGCGAGGGCGTGCCCATCCTGAC
mireap-m0012-3p	CCGGTGGGACCTTTTTTTTC	4	-	-29.2	20	9	35336103	35336212	35336113	35336132	CACAGGCAATGAACAAGATCGGTTCCATGGTGTAGTGGTTAGCACTCCAGACTTTGAATCTGGCGACCTGGGTTCGAATCCCGGTGGGACCTTTTTTTTCACTATTCTTT
mireap-m0013-5p	GAAAATCCGACTTTTTGCAA	5	+	-26	20	5	7345262	7345340	7345272	7345291	AGATGTCTACGAAAATCCGACTTTTTGCAATCAGGCATCCTAGCTAACCGCATGCAAAAATCGATTATCGTAGACGGAT
mireap-m0014-5p	TGTATGGCTCTGATACCAGCTCT	5	-	-31.3	23	13	17105443	17105569	17105537	17105559	TTCCTACAGTTGTATGGCTCTGATACCAGCTCTATGGACCCTTGTTTTTAAACAGGAATCAATCGTGTAAACTGTACCATTTCCTTGGATCAAGTAGTCTGGTACACACGAGTTCATAGCTGAGAAT
mireap-m0015-5p	CGCCGCCGGCGGGGGCCTTCCG	6	-	-48.7	22	5	20169402	20169478	20169447	20169468	AGCTTGCCGCCGCCGCCGGCGGGGGCCTTCCGCGGCGGCATGTCGGGATCGGAGTTGGCGGCGGCGGCGGAGGGTTG
mireap-m0016-3p	TAAATCCGTTGTAGTCTAGCTGG	7	-	-25.5	23	5	8202738	8202863	8202748	8202770	CAGTAATCCGAGTCCGTGAAAGAAAGCAGTGGATTTTTGTTCTTGTGCTGTTATAGTTAATTTGTAAAAATATTTGTATTTTGAAACCTTTCATAAATCCGTTGTAGTCTAGCTGGTTAGGATACT
mireap-m0017-3p	GATACGCACGGATACGTATCCC	7	-	-50.1	22	6	15855890	15855982	15855900	15855921	ACGGTGCGCATGCAGGTCACGTATCCCGTATCGGATACGTGTAGGATACGGATACGTATCCGATACGCACGGATACGTATCCCGTACGTATCG
mireap-m0018-5p	CGGCTTCATGTCTCCAACATG	8	+	-37	21	5	21649796	21649897	21649806	21649826	AGTGGCTGAGCGGCTTCATGTCTCCAACATGGTATGTGCAATTGCTTGTTTAATATGTGGATATTATTTGTGGGGAAACGAAGTTGTTTGTTTCTGGCCACA
mireap-m0019-3p	TCGTGCCGGCGGGGGCCGGGCT	9	-	-47.8	22	5	17882087	17882183	17882097	17882118	TGGGCGCGGCGCGAGGAAACGCACGGCGAGGCCGACCGCGAGGGACACGAGGAGCGGGGCGAGCTTCGTGCCGGCGGGGGCCGGGCTGTCCGCCTCC

## Sheet: Table S5
Supplementary Table S5. Similarity of Rice MIRs found orthologous with other species based on the sequences aligned
miRNA (Subject)	Query(Reads)	% Identity	Description	miRNA Family
aly-miR166f-5p	TTCTCGAGCCGGGCATCATTTGGTCTATT	94.74	MIMAT0017469 Arabidopsis lyrata miR166f-5p	MIR166
aly-miR844-3p	AAAGAAAGACTAGTATGATGGGTGAGGACTTT	95.24	MIMAT0017630 Arabidopsis lyrata miR844-3p	MIR844
aly-miR845b-3p	AGGGAGTGTCATCAGTTGGTATCAGAGCATTC	94.74	MIMAT0017634 Arabidopsis lyrata miR845b-3p	MIR845_1
aly-miR845b-3p	CGTACAACATTTGGTATCAGAGCGAGTTTAGAGAGTCCG	100	MIMAT0017634 Arabidopsis lyrata miR845b-3p	MIR845_1
aly-miR845b-5p	TTGTTGCTCTGATACCAATTGAGC	100	MIMAT0017633 Arabidopsis lyrata miR845b-5p	MIR845_1
aly-miR845b-5p	CAAGCTTCAATTGGTATCAGAGCAGGTATTG	100	MIMAT0017633 Arabidopsis lyrata miR845b-5p	MIR845_1
ath-miR164b-3p	AAATCATGTGCCCATCTTCCCCATCGCTC	95.24	MIMAT0031878 Arabidopsis thaliana miR164b-3p	MIR164
ath-miR165b	CAATCGGACCAGGCTTAATCCCTGTCC	94.74	MIMAT0000188 Arabidopsis thaliana miR165b	MIR166
ath-miR168a-3p	ATCGCCCGCCTTGCATCAACTGAATTCTC	100	MIMAT0031884 Arabidopsis thaliana miR168a-3p	MIR168
ath-miR168b-5p	GCCCTAGCTTGGTGCAGGTAGGGAACACC	94.74	MIMAT0000199 Arabidopsis thaliana miR168b-5p	MIR168
ath-miR2112-3p	TCGCAAATACGGATATAAAGAGAACTATATAG	94.74	MIMAT0011155 Arabidopsis thaliana miR2112-3p	MIR2112
ath-miR319b	CCGGTTGGACAGAAGGGAGCTCCCTCTCC	95.24	MIMAT0000512 Arabidopsis thaliana miR319b	MIR159
ath-miR319b	CAAATTGGACTGAAGGGACCTCCCTCTCC	95.24	MIMAT0000512 Arabidopsis thaliana miR319b	MIR159
ath-miR414	TTCTGGACGATGATGAAGAAGATGAAGAGGAAGAACC	95	MIMAT0001322 Arabidopsis thaliana miR414	MIR414
ath-miR414	GCGTTGAAGATGACGATGACGATGAAGATGATGACGTCTA	95.24	MIMAT0001322 Arabidopsis thaliana miR414	MIR414
ath-miR774b-5p	ATCTAGTCAAAGATGAGATGAAGATAGGGGTG	94.74	MIMAT0017739 Arabidopsis thaliana miR774b-5p	MIR774
ath-miR829-5p	AATTTATTGATTTTGAAGCTTTGAGTTGAATC	94.74	MIMAT0032019 Arabidopsis thaliana miR829-5p	MIR829
ath-miR835-5p	ATCTAAAGAACATATGCAAGAGATCCTCGTAT	100	MIMAT0004255 Arabidopsis thaliana miR835-5p	MIR835
ath-miR845a	TGCCATCCTTATCAGTTGGTATCAGAGCCGTG	95	MIMAT0004268 Arabidopsis thaliana miR845a	MIR845_1
ata-miR167f-3p	GTATTGAAGCTGCCGCATGATCTACTTC	94.74	MIMAT0037197 Aegilops tauschii miR167f-3p	MIR167_1
ata-miR2118b-3p	CTCCGAATGGGAACATGGAGGAAAGCCCA	100	MIMAT0037221 Aegilops tauschii miR2118b-3p	MIR2118
ata-miR2118b-3p	CCATGGAATGGGAACATGGAGGAAAGCATGAGCTCCTTC	100	MIMAT0037221 Aegilops tauschii miR2118b-3p	MIR2118
ata-miR2118b-3p	CCATGGAATGGGAACATGGAGGAAAGCTCC	100	MIMAT0037221 Aegilops tauschii miR2118b-3p	MIR2118
ata-miR2118b-3p	CCGGGAATGGGAACATGGAGGAAAGTCAG	100	MIMAT0037221 Aegilops tauschii miR2118b-3p	MIR2118
ata-miR5181-3p	CCCCTCCGTTCCAAAATAAGTGCAGCCGGC	95.24	MIMAT0037145 Aegilops tauschii miR5181-3p	MIR5067
ata-miR5181-3p	CAAACACTTATTTTGGGCCGGAGGGAGTATAA	95.24	MIMAT0037145 Aegilops tauschii miR5181-3p	MIR5067
ata-miR5181-3p	CGTCACTTATTTTGGAACGGAGGTAGTACACC	95	MIMAT0037145 Aegilops tauschii miR5181-3p	MIR5067
ata-miR5181-3p	TTCCCCTCCGTTCCAAAATAAGTGTAGTCCAG	95.24	MIMAT0037145 Aegilops tauschii miR5181-3p	MIR5067
atr-miR398	ATCAGGGGCGAGCTGGGAACACACGCAGG	95.24	MIMAT0033945 Amborella trichopoda miR398	MIR398
bdi-miR1127	TATCGGACAGAGGGAGTAGTATACTGACTCCC	95	MIMAT0012190 Brachypodium distachyon miR1127	MIR1122
bdi-miR1127	CCCGGACGGAGGGAGTAGTTTGAACCATACCC	100	MIMAT0012190 Brachypodium distachyon miR1127	MIR1122
bdi-miR156d-3p	AGTGTGCTCACTGCTCTGTCTGTCATCAGGT	100	MIMAT0027069 Brachypodium distachyon miR156d-3p	MIR156
bdi-miR164a-3p	TAATCATGTGCCCTTCTTATCCACCCCTC	95.24	MIMAT0027067 Brachypodium distachyon miR164a-3p	MIR164
bdi-miR164a-3p	GCCCATGCATGTGCCCTTCTTCTCCACCGTGCGATA	100	MIMAT0027067 Brachypodium distachyon miR164a-3p	MIR164
bdi-miR164a-3p	TGCATGTGCCCTTCTTCTCCACCCGAT	100	MIMAT0027067 Brachypodium distachyon miR164a-3p	MIR164
bdi-miR164c-3p	AAATCATGTGCGCTCCTTCTCCAGCTCTT	100	MIMAT0027084 Brachypodium distachyon miR164c-3p	MIR164
bdi-miR164c-3p	GTATCATGTGCGCTCCTTCTCCAGCGTCC	100	MIMAT0027084 Brachypodium distachyon miR164c-3p	MIR164
bdi-miR164c-3p	CCGCATGTGCGCTCCTTCTCCAGCAGCAA	100	MIMAT0027084 Brachypodium distachyon miR164c-3p	MIR164
bdi-miR1878-3p	GCCTATTTGTAGTGTTCAGATTGAGTTTGAAC	100	MIMAT0020565 Brachypodium distachyon miR1878-3p	MIR1878
bdi-miR1878-3p	GGCCATTTGTAGTGTTCAGATTGAGTTTACTCA	100	MIMAT0020565 Brachypodium distachyon miR1878-3p	MIR1878
bdi-miR437	TATCAACTTAGAGCAGTTTGACTTTGTCCGGTC	95	MIMAT0012188 Brachypodium distachyon miR437	MIR437
bdi-miR5067	GCGCAGCGACAAGTAATATGGACGGATGCGCT	94.74	MIMAT0020576 Brachypodium distachyon miR5067	MIR5067
bdi-miR5169a	CAAGAAGTTTGACCAAGATTGTAGAAAAGGTC	94.74	MIMAT0020711 Brachypodium distachyon miR5169a	MIR5169
bdi-miR5169a	TTGGAAGTTTGACCAAGTTTGTAGAAAAACTA	100	MIMAT0020711 Brachypodium distachyon miR5169a	MIR5169
bdi-miR5169a	AATCCAGGTTTGATCAAGTTTGTAGAAAAACC	94.74	MIMAT0020711 Brachypodium distachyon miR5169a	MIR5169
bdi-miR5169a	CAATTAAGTTTGACCAAGTTTGTAGAAAGGTC	100	MIMAT0020711 Brachypodium distachyon miR5169a	MIR5169
bdi-miR5174c-5p	TTCTTTATAGAACGGAGGGAGCTAC	94.74	MIMAT0030103 Brachypodium distachyon miR5174c-5p	MIR5067
bdi-miR5174d-3p	CGTTTATAGAACGGAGAGAGTACATGCAGTGC	94.74	MIMAT0030106 Brachypodium distachyon miR5174d-3p	MIR5067
bdi-miR5174d-3p	CGATTTATGAAACGGAGAGAGTAAGACACTCC	94.74	MIMAT0030106 Brachypodium distachyon miR5174d-3p	MIR5067
bdi-miR5174d-3p	CACAGGTTTTTTATGGAACGGAGAGAGTCGAG	100	MIMAT0030106 Brachypodium distachyon miR5174d-3p	MIR5067
bdi-miR5174d-5p	AAAAAATGCAGTCTTTATGAAACGGAGGGCTG	100	MIMAT0030105 Brachypodium distachyon miR5174d-5p	MIR5067
bdi-miR5174f	CAACTTTTATGAAACGGAGGAGTATCTGCGG	95	MIMAT0035538 Brachypodium distachyon miR5174f	MIR5067
bdi-miR5175a	AGCGCACATACTCCCTCCTTTCCTAAATTCCC	94.74	MIMAT0020719 Brachypodium distachyon miR5175a	MIR5067
bdi-miR5181a-3p	CGTCACTTATTATGGATCAGAGAGAGAGCCTC	100	MIMAT0027085 Brachypodium distachyon miR5181a-3p	MIR5067
bdi-miR7723b-5p	ATGATGGAGGTAGTAGTATCCCACC	94.74	MIMAT0030254 Brachypodium distachyon miR7723b-5p	MIR7723
bra-miR156a-3p	GTCCGACGGCTAAATACTCTCTCTCTGTCACC	100	MIMAT0035817 Brassica rapa miR156a-3p	MIR156
cca-miR6108f	CCATATGGTGAGAAGTGTAAGACTAACCA	94.74	MIMAT0024559 Cynara cardunculus miR6108f	MIR6108
cpa-miR8139c	CCCATCACCCGTCCTCTGCCAGGATTGGTA	94.74	MIMAT0031834 Carica papaya miR8139c	MIR8139
ghr-miR482a	GCAATCTTTCCTACTCCTCCCATACCCGGA	100	MIMAT0014339 Gossypium hirsutum miR482a	MIR482
gma-miR1520f-3p	AACAGTGATGTGTCCTGTTCTGATTGGCCACT	94.74	MIMAT0018244 Glycine max miR1520f-3p	MIR1520
gma-miR1520f-3p	ATTTCAATCAGAACAGGACACATCACCCTACG	94.74	MIMAT0018244 Glycine max miR1520f-3p	MIR1520
gma-miR1520p	AACCATCATCATCCACTAACAACATACCGTCA	95	MIMAT0018322 Glycine max miR1520p	MIR1520
gma-miR1520p	CACGGGTATGTTGTTAGTGGATGATGATTTCC	95	MIMAT0018322 Glycine max miR1520p	MIR1520
gma-miR1520q	ACCAATCAGAACAGGACACATCACCCATTC	95	MIMAT0018332 Glycine max miR1520q	MIR1520
gma-miR156g	AGGGAATACCTATCAGAAGATTGAGAGCACAG	94.74	MIMAT0018339 Glycine max miR156g	MIR156
gma-miR159a-5p	CCTACTAAGGGGAAAATTGGACTTCAAGGAGC	100	MIMAT0020919 Glycine max miR159a-5p	MIR159
gma-miR169j-3p	CAAGAAGAACTCGTCGAAACAAAACGAATCTT	94.74	MIMAT0021650 Glycine max miR169j-3p	MIR169_2
gma-miR319c	GGAGGAGCTCCTTTCGGTCCAAAAACTGC	95	MIMAT0001691 Glycine max miR319c	MIR159
gma-miR396j	TGCTTTCAACAGCTATCTTGAACTTCCCC	94.74	MIMAT0023214 Glycine max miR396j	MIR396
gma-miR482d-3p	ACTTTCTTCCCTACACCTCCCATACCCATC	100	MIMAT0021672 Glycine max miR482d-3p	MIR482
gma-miR482d-3p	ATACTCTTCCCTACACCTCCCATACCGGCC	100	MIMAT0021672 Glycine max miR482d-3p	MIR482
gma-miR482d-3p	CACTTCTTCCCTACACCTCCCATACCGCCC	100	MIMAT0021672 Glycine max miR482d-3p	MIR482
gma-miR482d-5p	CCAGTATGGGGGGATTGGGAAGGAATGC	100	MIMAT0021671 Glycine max miR482d-5p	MIR482
gma-miR482e	CCCCTATGGGGGGATTGGGCAGGATCCCC	95	MIMAT0023227 Glycine max miR482e	MIR482
gma-miR482e	CTCCTATGGGGGGATTGGGAAGGACCCC	100	MIMAT0023227 Glycine max miR482e	MIR482
gra-miR7484g	CTCAGGATATATGTTAGATAAAAGAGAAATCA	94.74	MIMAT0034206 Gossypium raimondii miR7484g	MIR7484
gra-miR7484j	TACGTTAGATCCAAGAGTATTTTAAGAGCTCC	94.74	MIMAT0034217 Gossypium raimondii miR7484j	MIR7484
gra-miR7484j	ATACGTTAGATCAAAAAGTACCCACGGGGTGC	94.74	MIMAT0034217 Gossypium raimondii miR7484j	MIR7484
gra-miR8639e	TTCTCATAAGAAGAATTAAACAAGACGGGATT	95	MIMAT0034264 Gossypium raimondii miR8639e	MIR8639
gra-miR8781b	GATTCGGAAGTTTGAGGATTG	94.74	MIMAT0034254 Gossypium raimondii miR8781b	MIR8781
han-miR3630-3p	AGAGTGGGAATCTCTCTGATGCTTCCCG	100	MIMAT0025526 Helianthus annuus miR3630-3p	MIR3630
han-miR3630-3p	GACGTGGGAATCTCTCTGATGCTTCCCA	100	MIMAT0025526 Helianthus annuus miR3630-3p	MIR3630
han-miR3630-3p	ACTGTGGGAATCTCTCTGATGCTTCCTC	100	MIMAT0025526 Helianthus annuus miR3630-3p	MIR3630
han-miR3630-3p	GGTGTGGGAATCTCTCTGATGCTTAAGT	100	MIMAT0025526 Helianthus annuus miR3630-3p	MIR3630
hvu-miR1120	CAAGGGTTCTTATATTTTGGGACGGAGGCTCC	95.24	MIMAT0018499 Hordeum vulgare miR1120	MIR1120
hvu-miR1120	TATTCTCCGTCCCAAAATATAACAATGATC	91.3	MIMAT0018499 Hordeum vulgare miR1120	MIR1120
hvu-miR1120	CACATACTTATATTTTGGGACGGAGGACGTAG	91.67	MIMAT0018499 Hordeum vulgare miR1120	MIR1120
hvu-miR1120	CCATTGTTATATTATGGGATGGAGGAAGGCGG	91.3	MIMAT0018499 Hordeum vulgare miR1120	MIR1120
hvu-miR444b	CAGTCGGCAAGCTAGAGACAGCAACTGCCG	95	MIMAT0020543 Hordeum vulgare miR444b	MIR444
hvu-miR444b	CAATCGGCAAGCTAGAGACAGCAACTGCC	95	MIMAT0020543 Hordeum vulgare miR444b	MIR444
hvu-miR444b	TCGGCGGCAAGCTAGAGACAGCAACTGCA	95.24	MIMAT0020543 Hordeum vulgare miR444b	MIR444
hvu-miR444b	ATTAAGCTAGAGACAGCAACTGCATCCCC	95.24	MIMAT0020543 Hordeum vulgare miR444b	MIR444
hvu-miR5049b	GCCGAATATTTAGGGACAGAGGGAGTTTCG	94.74	MIMAT0024797 Hordeum vulgare miR5049b	MIR5067
hvu-miR5049b	AGGTAATACTCCCTCTGTTCCTAAATACTTC	95.24	MIMAT0024797 Hordeum vulgare miR5049b	MIR5067
hvu-miR5049b	CTATCAACTATTTAGGGACAGAGGGAGTGTCC	94.74	MIMAT0024797 Hordeum vulgare miR5049b	MIR5067
hvu-miR5049b	ACAGTATTTAGGGACAGAGGGAGTATATCCCC	95.24	MIMAT0024797 Hordeum vulgare miR5049b	MIR5067
hvu-miR5049c	ACAAATATTTTGGGACGGAGAGAGTATGTGTC	95	MIMAT0024803 Hordeum vulgare miR5049c	MIR5067
hvu-miR5049c	GAGCAAAGACAAGTATTGTGGGACGGAGGGCC	91.3	MIMAT0024803 Hordeum vulgare miR5049c	MIR5067
hvu-miR5049c	CCTTATTACAATTAATTTGGGACGGAGATTGTA	95	MIMAT0024803 Hordeum vulgare miR5049c	MIR5067
hvu-miR5049c	CCAATCATTTTGGGACGGAGGAAGTCCC	95	MIMAT0024803 Hordeum vulgare miR5049c	MIR5067
hvu-miR5049e	TAAACTACTCCCTCTGTACCAAAATAACGCCC	94.74	MIMAT0024826 Hordeum vulgare miR5049e	MIR5067
mdm-miR167a	AAGAAGATCATCTGGCAGTTTCATCGTCC	100	MIMAT0025922 Malus domestica miR167a	MIR167_1
mdm-miR167a	GAAAAGATCATCTGGCAGTTTCATCCCCC	100	MIMAT0025922 Malus domestica miR167a	MIR167_1
mdm-miR482a-5p	TAACTTTTAATGGGCTGTTTGTGAAGAAGTCC	94.74	MIMAT0011164 Malus domestica miR482a-5p	MIR482
mes-miR482	ATTCTCTTCCCTACTCCACCCATGCCTTGG	100	MIMAT0029297 Manihot esculenta miR482	MIR482
mtr-miR1510a-3p	CCTAAACGGAGGATTAGGAAAAACATACTTC	94.74	MIMAT0010033 Medicago truncatula miR1510a-3p	MIR1510
mtr-miR2598	ACTCTGGGTTAAGAGTGATTATTCTGCCC	94.74	MIMAT0013301 Medicago truncatula miR2598	MIR2590
mtr-miR2673b	CTCGGAGGAAGAGGAAGAGGAAGAGATCTCC	100	MIMAT0013494 Medicago truncatula miR2673b	MIR2673
mtr-miR2673b	GCCGGAAGAGGAAGAGGAGGAGGGT	95	MIMAT0013494 Medicago truncatula miR2673b	MIR2673
mtr-miR396c	AGCTAATTCAAGAAGATCGTGGAAGACCGGTC	94.74	MIMAT0023119 Medicago truncatula miR396c	MIR396
mtr-miR5205b	ATCACTTATAATTTGGGACAGAGGGAGTGTCC	91.67	MIMAT0021134 Medicago truncatula miR5205b	MIR818
mtr-miR5205b	CCTTATATTTAGGGACTGAGGGAGTATTGTCC	91.67	MIMAT0021134 Medicago truncatula miR5205b	MIR818
mtr-miR5205b	CACCCTTATAATTTGGGACAGAGGGAGTGGGC	91.67	MIMAT0021134 Medicago truncatula miR5205b	MIR818
mtr-miR5205b	CCTTATATTTAGGGACGGAAGGAGTACTTCTG	91.67	MIMAT0021134 Medicago truncatula miR5205b	MIR818
mtr-miR5224b	GCCCATAGGTGAAGAGGATTGTAGAGGACCC	94.74	MIMAT0021185 Medicago truncatula miR5224b	MIR5224
mtr-miR5272e	AGTTGAATGGCTTGATTTTTGTTTGGATAC	94.74	MIMAT0021306 Medicago truncatula miR5272e	MIR5272
mtr-miR5298c	ATTTTAGGAATGGAGTTGATATGAAGATCTCC	94.74	MIMAT0021371 Medicago truncatula miR5298c	MIR5298
mtr-miR5752b	TTGTACTAAACCAAACAAGACCAATATTCGTC	100	MIMAT0023134 Medicago truncatula miR5752b	MIR5752
nta-miR6025b	AACCAACTATTTAGATGACATGTAAGAACCCC	94.74	MIMAT0023607 Nicotiana tabacum miR6025b	MIR6025
pab-miR482b	CATCGATGGGAGGAATAGAGAAGAAGAGCTAC	94.74	MIMAT0018157 Picea abies miR482b	MIR482
ppe-miR1511-3p	AGCCAGACCTCTGGCTCTGATACCATAAGTCG	100	MIMAT0031522 Prunus persica miR1511-3p	MIR1511
ppe-miR1511-3p	CGCTACCTGGCTCTGATACCATATC	100	MIMAT0031522 Prunus persica miR1511-3p	MIR1511
ppe-miR1511-3p	CTCACCTGGCTCTGATACCATTGG	100	MIMAT0031522 Prunus persica miR1511-3p	MIR1511
ppe-miR1511-5p	GGCAAGAAAACAAGACTCTGATACCACTGAGA	94.74	MIMAT0031521 Prunus persica miR1511-5p	MIR1511
ppt-miR1023b-3p	GACTACAGAGCAGAGAATTGAAGAAAGTGC	94.74	MIMAT0005105 Physcomitrella patens miR1023b-3p	MIR1023
ppt-miR1027a	CGCCATGATTGGTAGAGAAGATAGATGGCCCT	94.74	MIMAT0005114 Physcomitrella patens miR1027a	MIR1027
ppt-miR2083-3p	AATGATAATATTGATGAGTGCAAGAAGAGAGC	94.74	MIMAT0010023 Physcomitrella patens miR2083-3p	MIR899
ppt-miR529d	ATAGAGAAGAGAGAGAGCACAGCCTCTCA	100	MIMAT0005057 Physcomitrella patens miR529d	MIR529
ppt-miR529e	GGCCAGAAGAGAGAGAGAGTACAGCCCTTT	100	MIMAT0005058 Physcomitrella patens miR529e	MIR529
ppt-miR537b	CGATCGGTCGAGCCTGTCGAAACACCTCACCG	94.74	MIMAT0003146 Physcomitrella patens miR537b	MIR537
ppt-miR537b	CAGACTTGACGAGGTGTTTCGACAGGCTAGGC	94.74	MIMAT0003146 Physcomitrella patens miR537b	MIR537
ppt-miR537b	TAATAGCCTGTCGAAACACCTCGTCAAGGGCT	94.74	MIMAT0003146 Physcomitrella patens miR537b	MIR537
ppt-miR902l-5p	CGGAAATGAAGAATCTGGAACACAGTCTTA	94.74	MIMAT0005087 Physcomitrella patens miR902l-5p	MIR902
pta-miR159b	CAACCGGAGTGAGTTGGATGGAAGAGAGCTCC	94.74	MIMAT0004991 Pinus taeda miR159b	MIR159
pta-miR159b	GCCCCGGAGTGAGTTGGATGGAAGAGAGCTCC	94.74	MIMAT0004991 Pinus taeda miR159b	MIR159
pta-miR159b	GAGCGGAGTGAGTTGGATGGAAGAGAGCTCC	94.74	MIMAT0004991 Pinus taeda miR159b	MIR159
ptc-miR166p	CCCCTCGGACCAGGCTCAATTCCTCCTGC	95	MIMAT0001939 Populus trichocarpa miR166p	MIR166
ptc-miR482a.2	ACCCAATGGGAGGTGTAGGCAAGACTGCTTAC	95	MIMAT0006785 Populus trichocarpa miR482a.2	MIR482
ptc-miR6476a	CCCAGTCAGTGGGGATGAAACATGCTCTC	94.74	MIMAT0025217 Populus trichocarpa miR6476a	MIR6476
ptc-miR6476a	AAACCAGGTCAGTGGGGATGAAACATGCACTA	94.74	MIMAT0025217 Populus trichocarpa miR6476a	MIR6476
ptc-miR6476a	CAGTCAGGTCAGTGGGGATGAAACATGCTTT	94.74	MIMAT0025217 Populus trichocarpa miR6476a	MIR6476
ptc-miR6476a	ACACGTCAGTGGGGATGAAACATGAGTCA	95	MIMAT0025217 Populus trichocarpa miR6476a	MIR6476
sbi-miR2118-5p	CCCAGGCATGGGGACATGTAGGAATGGACA	95	MIMAT0026426 Sorghum bicolor miR2118-5p	MIR2118
sbi-miR437x-5p	ATCTAAAAAGTTTGACTAAGGACAAAGTCCTT	94.74	MIMAT0026406 Sorghum bicolor miR437x-5p	MIR437
sbi-miR437x-5p	ACACAGAAGTTTGACTTAGGACAAAACTTCGC	100	MIMAT0026406 Sorghum bicolor miR437x-5p	MIR437
sbi-miR437x-5p	CATATTAAAAAAGTTTGACTAAGGACAAGCTC	94.74	MIMAT0026406 Sorghum bicolor miR437x-5p	MIR437
sbi-miR5568f-3p	GTGTGTGTCTTATATTTTGGAATGGAGGATAC	95.24	MIMAT0026443 Sorghum bicolor miR5568f-3p	MIR5568
sbi-miR5568f-3p	CATCAGTCTTATAATATGGAATGGAGGGGTGC	95.24	MIMAT0026443 Sorghum bicolor miR5568f-3p	MIR5568
sbi-miR5568f-3p	AGGCTGTGTCTTATATTTTGGAATGGAGATCA	95.24	MIMAT0026443 Sorghum bicolor miR5568f-3p	MIR5568
sbi-miR5568f-3p	AAATACGTCTTATAACTTGGAATGGGGAGGGT	94.74	MIMAT0026443 Sorghum bicolor miR5568f-3p	MIR5568
sbi-miR5568g-3p	TTAAAACGTCTTATAATATGGAACAGAGAGCGG	95	MIMAT0026466 Sorghum bicolor miR5568g-3p	MIR818
sbi-miR6224b-3p	CTACCTTATATTCTAGGACGGAGGGAGTATATCACGCC	95.24	MIMAT0026417 Sorghum bicolor miR6224b-3p	MIR6224
sbi-miR6224b-3p	TTATCTATATTCTAGGACGGAGGGAGTACTAG	94.74	MIMAT0026417 Sorghum bicolor miR6224b-3p	MIR6224
sbi-miR6224b-3p	CTAATTCTTATATTCTAGGACGGAGGGACGGG	95.24	MIMAT0026417 Sorghum bicolor miR6224b-3p	MIR6224
sbi-miR6224b-3p	CATCGTTATATTCTAGGACGGAGGTAGTCTTC	94.74	MIMAT0026417 Sorghum bicolor miR6224b-3p	MIR6224
sbi-miR6224b-5p	CAACCTTATATTTTAGGACGGAGGGAGTGTTA	95	MIMAT0026416 Sorghum bicolor miR6224b-5p	MIR6224
sbi-miR6224b-5p	AACACCTTATATTTTAGGACGGAGGAAGGTCC	95	MIMAT0026416 Sorghum bicolor miR6224b-5p	MIR6224
sbi-miR6224b-5p	CTCCACTTATATTTTAGGACGGAGGGAGTGTG	94.74	MIMAT0026416 Sorghum bicolor miR6224b-5p	MIR6224
sbi-miR6224b-5p	CCTTATATTTTAGGACGGAGAGAGTAGGGCA	95	MIMAT0026416 Sorghum bicolor miR6224b-5p	MIR6224
sly-miR156e-5p	TTGTTTGATAGAGGAGAGTGAGCACCGCC	95	MIMAT0035453 Solanum lycopersicum miR156e-5p	MIR156
sly-miR164b-3p	AAAGTGGAGAAGCAGAACACGTGCACTCC	94.74	MIMAT0033976 Solanum lycopersicum miR164b-3p	MIR164
sly-miR1919c-3p	GCGGACAAAGCCTGTCACGGATGACTCTCTAC	94.74	MIMAT0007913 Solanum lycopersicum miR1919c-3p	MIR1919
sly-miR6024	GTTTTAGCAATAGTTGTTTTGTACTCCCCCAA	94.74	MIMAT0023594 Solanum lycopersicum miR6024	MIR6024
sly-miR6024	AGCTTTTTAGCAAGAGTTGTTTTACCCGCC	100	MIMAT0023594 Solanum lycopersicum miR6024	MIR6024
smo-miR1082b	CTATGTCATCATGTTGGCCTGCTGGGCGGCGC	95	MIMAT0005233 Selaginella moellendorffii miR1082b	MIR1082
sof-miR159e	ATCGTTTGGATTGAAAAGAGCTCTGCTCCC	95	MIMAT0001661 Saccharum officinarum miR159e	MIR159
stu-miR1886g-5p	ATGTCCAAACATCGATCTCCGGCGCCGCAATT	94.74	MIMAT0030900 Solanum tuberosum miR1886g-5p	MIR1886
stu-miR8024a-5p	CAATTCGGGAATGAAGAATGTAAAGACTTC	94.74	MIMAT0031201 Solanum tuberosum miR8024a-5p	MIR8024
tae-miR1120a	CGAGAAAGTCTTATATTATGAAACGGAGACTCT	95	MIMAT0005355 Triticum aestivum miR1120a	MIR1120
tae-miR1120a	TTAACTTATATTTTGAGACGGAGGGAGTGTCA	94.74	MIMAT0005355 Triticum aestivum miR1120a	MIR1120
tae-miR1120a	TCCTCTTATATTAGGAGACGGAGGGAGTTGTG	95	MIMAT0005355 Triticum aestivum miR1120a	MIR1120
tae-miR1120a	CGTCATTGTTATATTATGAGACGGAGGAGAG	95.65	MIMAT0005355 Triticum aestivum miR1120a	MIR1120
tae-miR1120b-3p	CCATCTTATATTTTGGGACAGAGAGAGTAACG	95	MIMAT0035794 Triticum aestivum miR1120b-3p	MIR1120
tae-miR1120b-3p	TGCAAATTCTTATATTTTGGGACAGAGGCTCA	95.24	MIMAT0035794 Triticum aestivum miR1120b-3p	MIR1120
tae-miR1120b-3p	TGGGTTCTTATATTTTGGGACAGAGAGATCCC	95.24	MIMAT0035794 Triticum aestivum miR1120b-3p	MIR1120
tae-miR1120b-3p	ACAAAATCTCTTATATTGTGGGACAGAGATAT	100	MIMAT0035794 Triticum aestivum miR1120b-3p	MIR1120
tae-miR1122c-3p	CTCTAATATTTTGGGACGGAGGATGTATCCAC	95.24	MIMAT0035788 Triticum aestivum miR1122c-3p	MIR1120
tae-miR1122c-3p	CCTAATATTATGGGATGGAGGAAGTATTCCTC	95	MIMAT0035788 Triticum aestivum miR1122c-3p	MIR1120
tae-miR1122c-3p	GCTAATATTTTGGGACGGAGGAAGTAGCTTCC	95	MIMAT0035788 Triticum aestivum miR1122c-3p	MIR1120
tae-miR1122c-3p	CTACGTATAATATTATAGGACGGAGGGAACCC	94.74	MIMAT0035788 Triticum aestivum miR1122c-3p	MIR1120
tae-miR1128	CCGAATTTTCGGACGGAGGTAGTAGCACCAC	94.74	MIMAT0005363 Triticum aestivum miR1128	MIR1122
tae-miR1128	CGTTATTATTTCGGACGGAGGGAGTAACGGTC	100	MIMAT0005363 Triticum aestivum miR1128	MIR1122
tae-miR1128	GACATGTTTTCGGACGGAGAGAGTAGTGTCG	95	MIMAT0005363 Triticum aestivum miR1128	MIR1122
tae-miR1130a	TCGACTTATATTACGAGACGGAGGGAGTGCAC	95	MIMAT0005365 Triticum aestivum miR1130a	MIR818
tae-miR1130a	AAGCTGACTTACATTACGAAACGGAGGAGTGC	95	MIMAT0005365 Triticum aestivum miR1130a	MIR818
tae-miR1130a	AAAACTTACATTACGAAACGGAGGGAGTAACG	95	MIMAT0005365 Triticum aestivum miR1130a	MIR818
tae-miR1130b-3p	CTGTCTTATATTAAGGGACGGAGGGTACCGAT	95.24	MIMAT0035796 Triticum aestivum miR1130b-3p	MIR818
tae-miR1130b-3p	AGATTATCTTATATTGTGGGACGGAGGGGCC	95.24	MIMAT0035796 Triticum aestivum miR1130b-3p	MIR818
tae-miR1130b-3p	CTATCTTATATTTTGGGACGGAGGTAGTTTGA	95.24	MIMAT0035796 Triticum aestivum miR1130b-3p	MIR818
tae-miR1130b-3p	ACTGATATCTTATATTGTGGGACGGAGGAGTG	95.24	MIMAT0035796 Triticum aestivum miR1130b-3p	MIR818
tae-miR1133	ACTCTCTAGGACGGAGGGAGTATATGAACTCC	100	MIMAT0005368 Triticum aestivum miR1133	MIR1122
tae-miR1133	ATCCAGTATTTTTCGGACGGAGGAAGTATTC	94.74	MIMAT0005368 Triticum aestivum miR1133	MIR1122
tae-miR1133	CTTCGGACGGAGGGAGTATCATATCAACGTAG	100	MIMAT0005368 Triticum aestivum miR1133	MIR1122
tae-miR1133	TGAATTTAGGACGGAGGGAGTATATGCCGTGA	100	MIMAT0005368 Triticum aestivum miR1133	MIR1122
tae-miR1137a	AGTACAAAGATGAGTCATCTCTGACGGGGCCA	94.74	MIMAT0005372 Triticum aestivum miR1137a	MIR1120
tae-miR167b	ATACTGAAGCTGACAGAATGATCTATCAG	95.24	MIMAT0018214 Triticum aestivum miR167b	MIR167_1
tae-miR5049-3p	AGCTATACTCCCTCCGATCCGTATTTTGGTC	95	MIMAT0035809 Triticum aestivum miR5049-3p	MIR5067
tae-miR5049-3p	ATGATAAAATACGGATCGGAGGGAGTATGTAG	95	MIMAT0035809 Triticum aestivum miR5049-3p	MIR5067
tae-miR5084	GAAGGAGATCCCCTGCAGTACTGTATGTGGTC	95	MIMAT0020566 Triticum aestivum miR5084	MIR5084
tae-miR5084	GCAGGATCCACTGCAGTACTGCTGATGCGTCC	94.74	MIMAT0020566 Triticum aestivum miR5084	MIR5084
tae-miR5084	TTCTGCACATACAGTATTGCAGAGGATCATTT	95	MIMAT0020566 Triticum aestivum miR5084	MIR5084
tae-miR7757-5p	CTCATAAGGAAATGGATAGCTGAAGGATTTATCCTGG	95.24	MIMAT0035800 Triticum aestivum miR7757-5p	MIR7757
vun-miR2118	CCCTTTGCCGATTCCACCCATTCCTTCAG	100	MIMAT0022767 Vigna unguiculata miR2118	MIR482
vun-miR2118	CCATTTGCCGATTCCACCCATTTAATC	100	MIMAT0022767 Vigna unguiculata miR2118	MIR482
vvi-miR2111-3p	ATCACTAATCGGCAACCAGAGGACATGCGGTT	94.74	MIMAT0016365 Vitis vinifera miR2111-3p	MIR2111
vvi-miR3630-3p	GGATATGGGAATCTCTCTGATGCATGCCC	100	MIMAT0018028 Vitis vinifera miR3630-3p	MIR3630
vvi-miR3630-3p	CCATTCAATGGGAATCTCTCTGATGCATGTGT	100	MIMAT0018028 Vitis vinifera miR3630-3p	MIR3630
vvi-miR3630-3p	GTCTGGGAATCTCTCTGATGCATCGCC	100	MIMAT0018028 Vitis vinifera miR3630-3p	MIR3630
vvi-miR3630-3p	CATTTGGGAATCTCTCTGATGCTTGTCC	100	MIMAT0018028 Vitis vinifera miR3630-3p	MIR3630
vvi-miR3630-5p	TTGCAAGTCACGATATCAGAACCGTGGCG	94.74	MIMAT0018027 Vitis vinifera miR3630-5p	MIR3630
vvi-miR845b	AGATAGTCTAGCTCTGATACCAATTGTACGGT	100	MIMAT0006580 Vitis vinifera miR845b	MIR845_3
vvi-miR845b	TAAACAACCAAAGCTCTGATACCACTTGATTA	94.74	MIMAT0006580 Vitis vinifera miR845b	MIR845_3
vvi-miR845e	GAATCTGGCTCTGATACCAATTGTAGAAGGCC	100	MIMAT0006583 Vitis vinifera miR845e	MIR845_2
vvi-miR845e	ATATGGCTCGGATACCAATTGAAAAGGGTCC	94.74	MIMAT0006583 Vitis vinifera miR845e	MIR845_2
zma-miR156e-3p	ATATGCTGAGATGAGAGAGAGAGCAGTG	94.74	MIMAT0015128 Zea mays miR156e-3p	MIR156
zma-miR156h-3p	AAGAGCTCACAGCTCTTTCTGTCATCCCCC	95.45	MIMAT0015130 Zea mays miR156h-3p	MIR156
zma-miR159g-3p	ATGGAAGTTGTTCTGGAGCGAAGGGAGTTCTG	94.74	MIMAT0013976 Zea mays miR159g-3p	MIR159
zma-miR162-5p	ACACGGGCGCAGTGGTTTATCGATCTCCC	100	MIMAT0015147 Zea mays miR162-5p	MIR162_2
zma-miR162-5p	CACTGGGCGCAGTGGTTTATCGATCGGGG	100	MIMAT0015147 Zea mays miR162-5p	MIR162_2
zma-miR162-5p	ACGTGGGCGCAGTGGTTTATCGATCCACC	100	MIMAT0015147 Zea mays miR162-5p	MIR162_2
zma-miR162-5p	ACTGGGGCGCAGTGGTTTATCGATCTCCC	100	MIMAT0015147 Zea mays miR162-5p	MIR162_2
zma-miR167f-3p	AGCCAGATCGTGCTGCGCGGTTTCATCCTCC	95	MIMAT0015187 Zea mays miR167f-3p	MIR167_1
zma-miR167f-3p	ACTGAGATCGTGCTGCGCAGTTTCACTGA	100	MIMAT0015187 Zea mays miR167f-3p	MIR167_1
zma-miR2275b-3p	ACGATTCAGTTTCCTCTAATATCTCGTTTC	100	MIMAT0011770 Zea mays miR2275b-3p	MIR2275
zma-miR2275b-3p	AAACTTCAGTTTCCTCTAATATCTCGCGTC	100	MIMAT0011770 Zea mays miR2275b-3p	MIR2275
zma-miR2275b-3p	GGTATTCAGTTTCCTCTAATATCTCGGGCC	100	MIMAT0011770 Zea mays miR2275b-3p	MIR2275
zma-miR2275b-3p	CTCATTCAGTTTCCTCTAATATCTCGCTTC	100	MIMAT0011770 Zea mays miR2275b-3p	MIR2275
zma-miR2275b-5p	CAACAGGATTAGAGGGAACTGAACCCCTC	95.24	MIMAT0011769 Zea mays miR2275b-5p	MIR2275
zma-miR2275b-5p	AAACAGGATTAGAGGGAACTGAACCCCTC	95.24	MIMAT0011769 Zea mays miR2275b-5p	MIR2275
zma-miR2275b-5p	CACCAGGATTAGAGGGAACTGAACCCCTC	95.24	MIMAT0011769 Zea mays miR2275b-5p	MIR2275
zma-miR2275b-5p	AAACAGGATTAGAGGGAACTGAACCCCTC	95.24	MIMAT0011769 Zea mays miR2275b-5p	MIR2275
zma-miR319b-5p	CGAGAGAGCGTCCTTCAGTCCACTCAATC	100	MIMAT0015182 Zea mays miR319b-5p	MIR159
zma-miR319b-5p	TTACAGAGCGTCCTTCAGTCCACTCAATCGC	100	MIMAT0015182 Zea mays miR319b-5p	MIR159
zma-miR319b-5p	CAGGAGAGCGTCCTTCAGTCCACTCACTGA	100	MIMAT0015182 Zea mays miR319b-5p	MIR159
zma-miR319b-5p	CTCTAGAGCGTCCTTCAGTCCACTCATTTG	100	MIMAT0015182 Zea mays miR319b-5p	MIR159
zma-miR393b-3p	GCAATCATGCGATCCTTTTGGAGGCGTAT	100	MIMAT0015334 Zea mays miR393b-3p	MIR393
zma-miR393b-3p	GCAGATCATGCGATCCTTTTGGAGGTAC	100	MIMAT0015334 Zea mays miR393b-3p	MIR393
zma-miR393b-3p	GCACATCATGCGATCCTTTTGGAGGTCCG	100	MIMAT0015334 Zea mays miR393b-3p	MIR393
zma-miR399j-5p	GCCGGGCAGCTCTCTTCTGGCAGGGTGC	95	MIMAT0015359 Zea mays miR399j-5p	MIR399
zma-miR529-5p	CAAGAGAAGAGAGAGAGTACAGCCTGCTC	100	MIMAT0014030 Zea mays miR529-5p	MIR529
zma-miR529-5p	CTAGAGAAGAGAGAGAGTACAGCCTATTC	100	MIMAT0014030 Zea mays miR529-5p	MIR529
zma-miR529-5p	ACAGAGAAGAGAGAGAGTACAGCCTTAGTTCAGATCAAAC	100	MIMAT0014030 Zea mays miR529-5p	MIR529
zma-miR529-5p	TAAGAGAAGAGAGAGAGTACAGCCTCCTC	100	MIMAT0014030 Zea mays miR529-5p	MIR529

## Sheet: Table S6
Supplementary Table S6. List of MIR families and the miRNA categorized into them.
Family	miRNA
MIR827	osa-miR827
MIR820	osa-miR820c
MIR818	osa-miR1436;osa-miR1439;osa-miR818a
MIR815	osa-miR815a
MIR814	osa-miR814c
MIR812	osa-miR812q; osa-miR812r; osa-miR812e; osa-miR812g; osa-miR812k; osa-miR812o-5p; osa-miR812s; osa-miR812v; osa-miR812f; osa-miR812n-5p; osa-miR812o-3p; osa-miR812p; osa-miR812n-3p
MIR810	osa-miR810b.2;osa-miR810b.1;osa-miR810a
MIR806	osa-miR818f;osa-miR5824
MIR5539	osa-miR5539b
MIR5534	osa-miR5534b;osa-miR5534a
MIR5512	osa-miR5512b
MIR535	osa-miR535-5p;osa-miR535-3p
MIR530	osa-miR530-5p;osa-miR530-3p
MIR529	osa-miR529a;osa-miR529b
MIR528	osa-miR528-5p;osa-miR528-3p
MIR5160	osa-miR5540;osa-miR5160
MIR5157	osa-miR5157b-3p
MIR5148	osa-miR5148b
MIR5143	osa-miR5143b
MIR444	osa-miR444b.2;osa-miR444a-5p;osa-miR444c.1;osa-miR444d.2;osa-miR444d.3;osa-miR444f
MIR439	osa-miR439c
MIR408	osa-miR408-3p;osa-miR408-5p
MIR399	osa-miR399j;osa-miR399d;osa-miR399i;osa-miR399b
MIR398	osa-miR398b
MIR397	osa-miR397b;osa-miR397a
MIR396	osa-miR396e-5p;osa-miR396f-5p;osa-miR396c-5p;osa-miR396a-3p;osa-miR396a-5p;osa-miR396c-3p;osa-miR396e-3p
MIR395	osa-miR395e
MIR394	osa-miR394
MIR393	osa-miR393b-3p;osa-miR393b-5p
MIR390	osa-miR390-5p
MIR2873	osa-miR2873a;osa-miR2873c
MIR2871	osa-miR2871a-5p;osa-miR2871b-3p;osa-miR2871b-5p
MIR2863	osa-miR2863b
MIR2275	osa-miR2275d;osa-miR2275b;osa-miR2275c
MIR2121	osa-miR2121a
MIR2118	osa-miR1859;osa-miR2118p;osa-miR2118g;osa-miR2118i;osa-miR2118o;osa-miR2118b;osa-miR2118f;osa-miR2118l;osa-miR2118r;osa-miR2118a;osa-miR2118c;osa-miR2118h
MIR1883	osa-miR1883a
MIR1878	osa-miR1878
MIR1863	osa-miR1863c
MIR1862	osa-miR1862d;osa-miR1862e;osa-miR1862c
MIR1861	osa-miR1861h;osa-miR1861g;osa-miR1861k
MIR1846	osa-miR1846e;osa-miR1846c-5p;osa-miR1846d-5p
MIR172	osa-miR172b
MIR171_1	osa-miR171d-3p;osa-miR171c-5p;osa-miR171e-5p;osa-miR171f-5p;osa-miR171i-3p
MIR169_4	osa-miR169q
MIR169_2	osa-miR169b;osa-miR169a
MIR169_1	osa-miR169d;osa-miR169f.2
MIR168	osa-miR168a-5p;osa-miR168a-3p
MIR167_1	osa-miR167f;osa-miR167a-5p;osa-miR167h-3p;osa-miR167e-3p;osa-miR167d-3p;osa-miR167a-3p
MIR166	osa-miR166l-3p;osa-miR166a-3p;osa-miR166g-3p;osa-miR166m;osa-miR166d-5p;osa-miR166h-5p;osa-miR166b-5p;osa-miR166e-5p;osa-miR166c-5p;osa-miR166k-5p;osa-miR166l-5p;osa-miR166j-5p;osa-miR166i-3p
MIR164	osa-miR164b;osa-miR164d;osa-miR164c;osa-miR164e
MIR162_2	osa-miR162a;osa-miR162b
MIR160	osa-miR160f-5p;osa-miR160d-5p;osa-miR160e-5p;osa-miR160f-3p
MIR159	osa-miR319b;osa-miR159a.1;osa-miR319a-3p;osa-miR159c;osa-miR159a.2;osa-miR159f
MIR156	osa-miR156i;osa-miR156l-5p;osa-miR156j-3p;osa-miR156k;osa-miR156f-3p
MIR1440	osa-miR1440b
MIR1437	osa-miR1437b-3p
MIR1319	osa-miR1319b;osa-miR1319a
MIR818	osa-miR818a;osa-miR1436;osa-miR1442;osa-miR1439
MIR812	osa-miR812q;osa-miR812o-5p;osa-miR812e;osa-miR812g;osa-miR812k;osa-miR812r;osa-miR812v;osa-miR812f;osa-miR812n-3p;osa-miR812n-5p;osa-miR812s;osa-miR812p;osa-miR812o-3p
MIR810	osa-miR810b.2;osa-miR810a;osa-miR810b.1
MIR806	osa-miR5824;osa-miR818f
MIR5534	osa-miR5534a
MIR530	osa-miR530-3p;osa-miR530-5p
MIR5179	osa-miR5179
MIR5160	osa-miR5160;osa-miR5540
MIR5079	osa-miR5079a
MIR444	osa-miR444c.1;osa-miR444b.2;osa-miR444a-5p;osa-miR444d.2;osa-miR444d.3
MIR437	osa-miR437
MIR399	osa-miR399j;osa-miR399d;osa-miR399b;osa-miR399i
MIR396_2	osa-miR396h
MIR396	osa-miR396e-5p;osa-miR396c-5p;osa-miR396f-5p;osa-miR396a-3p;osa-miR396a-5p;osa-miR396c-3p;osa-miR396f-3p;osa-miR396e-3p
MIR395	osa-miR395c;osa-miR395e
MIR390	osa-miR390-5p;osa-miR390-3p
MIR2907	osa-miR2907b
MIR2873	osa-miR2873c
MIR2871	osa-miR2871a-5p;osa-miR2871b-3p
MIR2863	osa-miR2863b;osa-miR2863c
MIR2275	osa-miR2275d;osa-miR2275c;osa-miR2275b
MIR2118	osa-miR2118r;osa-miR2118o;osa-miR2118b;osa-miR1859;osa-miR2118h;osa-miR2118l;osa-miR2118d;osa-miR2118f
MIR1863	osa-miR1863b.2;osa-miR1863c
MIR1861	osa-miR1861h;osa-miR1861a;osa-miR1861k;osa-miR1861g
MIR1846	osa-miR1846c-5p;osa-miR1846e;osa-miR1846d-5p;osa-miR1846d-3p
MIR172	osa-miR172b;osa-miR172a
MIR171_1	osa-miR171d-3p;osa-miR171f-5p;osa-miR171d-5p;osa-miR171c-5p;osa-miR171e-5p;osa-miR171i-3p
MIR169_1	osa-miR169f.2
MIR167_1	osa-miR167f;osa-miR167a-5p;osa-miR167h-3p;osa-miR167d-3p;osa-miR167a-3p;osa-miR167e-3p
MIR166	osa-miR166l-3p;osa-miR166g-3p;osa-miR166a-3p;osa-miR166b-5p;osa-miR166c-5p;osa-miR166d-5p;osa-miR166h-5p;osa-miR166m;osa-miR166e-5p;osa-miR166j-5p;osa-miR166e-3p;osa-miR166k-5p;osa-miR166i-3p;osa-miR166l-5p
MIR159	osa-miR319b;osa-miR159a.1;osa-miR159f;osa-miR159a.2;osa-miR319a-3p;osa-miR159c;osa-miR159e
MIR156	osa-miR156i;osa-miR156j-3p;osa-miR156l-5p;osa-miR156f-3p;osa-miR156k
MIR1437	osa-miR1437b-5p
MIR812	osa-miR812e;osa-miR812g;osa-miR812s;osa-miR812o-5p;osa-miR812k;osa-miR812n-5p;osa-miR812p;osa-miR812v;osa-miR812f;osa-miR812n-3p;osa-miR812o-3p;osa-miR812q;osa-miR812r
MIR810	osa-miR810b.1;osa-miR810b.2;osa-miR810a
MIR5516	osa-miR5516b
MIR535	osa-miR535-5p
MIR529	osa-miR529b;osa-miR529a
MIR444	osa-miR444b.2;osa-miR444c.1;osa-miR444d.2;osa-miR444a-5p;osa-miR444d.3
MIR408	osa-miR408-5p
MIR396	osa-miR396e-5p;osa-miR396f-5p;osa-miR396a-3p;osa-miR396c-5p;osa-miR396a-5p;osa-miR396c-3p;osa-miR396f-3p
MIR395	osa-miR395t;osa-miR395e;osa-miR395w;osa-miR395x
MIR2873	osa-miR2873b;osa-miR2873c;osa-miR2873a
MIR2871	osa-miR2871b-3p;osa-miR2871a-5p
MIR2275	osa-miR2275c;osa-miR2275d
MIR2118	osa-miR2118g;osa-miR2118d;osa-miR2118a;osa-miR2118r;osa-miR1859;osa-miR2118b;osa-miR2118l
MIR1861	osa-miR1861g;osa-miR1861h;osa-miR1861k;osa-miR1861d
MIR1846	osa-miR1846c-5p;osa-miR1846e;osa-miR1846b-3p;osa-miR1846d-5p
MIR171_1	osa-miR171i-3p;osa-miR171d-3p;osa-miR171d-5p;osa-miR171c-5p;osa-miR171e-5p
MIR169_1	osa-miR169r-5p
MIR167_1	osa-miR167f;osa-miR167a-5p;osa-miR167h-3p;osa-miR167a-3p;osa-miR167d-3p;osa-miR167e-3p
MIR166	osa-miR166l-3p;osa-miR166a-3p;osa-miR166g-3p;osa-miR166d-5p;osa-miR166m;osa-miR166b-5p;osa-miR166c-5p;osa-miR166h-5p;osa-miR166e-5p;osa-miR166i-5p;osa-miR166l-5p;osa-miR166i-3p;osa-miR166k-5p;osa-miR166e-3p;osa-miR166j-5p
MIR160	osa-miR160d-5p;osa-miR160e-5p;osa-miR160f-5p
MIR159	osa-miR319b;osa-miR159a.1;osa-miR159f;osa-miR159c;osa-miR159e
MIR156	osa-miR156i;osa-miR156l-5p;osa-miR156k
MIR1440	osa-miR1440a
MIR1437	osa-miR1437b-3p;osa-miR1437b-5p
MIR1428	osa-miR1428f-5p
MIR818	osa-miR1436;osa-miR818a;osa-miR1439
MIR812	osa-miR812s;osa-miR812e;osa-miR812f;osa-miR812g;osa-miR812o-3p;osa-miR812q;osa-miR812k;osa-miR812r;osa-miR812o-5p;osa-miR812p;osa-miR812n-5p;osa-miR812v;osa-miR812n-3p
MIR5534	osa-miR5534a;osa-miR5534b
MIR408	osa-miR408-3p
MIR399	osa-miR399b;osa-miR399j;osa-miR399d
MIR396	osa-miR396e-5p;osa-miR396f-5p;osa-miR396c-5p;osa-miR396a-3p;osa-miR396a-5p;osa-miR396c-3p;osa-miR396e-3p;osa-miR396f-3p
MIR2873	osa-miR2873b
MIR2871	osa-miR2871b-3p
MIR2118	osa-miR2118b;osa-miR2118r;osa-miR2118p;osa-miR1859;osa-miR2118f;osa-miR2118l;osa-miR2118o;osa-miR2118c;osa-miR2118g;osa-miR2118h;osa-miR2118d
MIR1863	osa-miR1863b.2;osa-miR1863c;osa-miR1863b
MIR1861	osa-miR1861h;osa-miR1861k;osa-miR1861g
MIR1846	osa-miR1846c-5p;osa-miR1846e;osa-miR1846d-3p;osa-miR1846d-5p
MIR171_1	osa-miR171d-5p;osa-miR171d-3p;osa-miR171i-3p;osa-miR171c-5p;osa-miR171e-5p
MIR169_2	osa-miR169b
MIR169_1	osa-miR169r-5p;osa-miR169d;osa-miR169f.2
MIR166	osa-miR166l-3p;osa-miR166a-3p;osa-miR166e-5p;osa-miR166g-3p;osa-miR166c-5p;osa-miR166d-5p;osa-miR166b-5p;osa-miR166h-5p;osa-miR166m;osa-miR166j-5p;osa-miR166i-5p;osa-miR166i-3p
MIR164	osa-miR164b;osa-miR164e;osa-miR164d;osa-miR164c
MIR162_2	osa-miR162b;osa-miR162a
MIR160	osa-miR160d-5p;osa-miR160f-5p;osa-miR160b-3p;osa-miR160e-5p;osa-miR160f-3p
MIR159	osa-miR319b;osa-miR159a.1;osa-miR159c;osa-miR159f;osa-miR319a-3p;osa-miR159a.2
MIR156	osa-miR156i;osa-miR156j-3p;osa-miR156k;osa-miR156l-5p
MIR1440	osa-miR1440a;osa-miR1440b
MIR1437	osa-miR1437b-5p;osa-miR1437b-3p
MIR1428	osa-miR1428e-3p
MIR1319	osa-miR1319a;osa-miR1319b

## Sheet: Table S7
Supplementary Table S7A. List of Differentially Expressed known miRNA in SP grown under Sun and Shade condition. DEm with Log2 FC ≥1.00 is considered as Up- and ≤-1.00 is considered as Down-regulated.
miRNA	Expression_Sun	Expression_Shade	FoldChange	log2FoldChange	P Value	Regulation	Accession
osa-miR820c	33.9801	15.5561	0.457801	-1.12721	0.0215066	DOWN	MIMAT0004081 Oryza sativa miR820c		≤
osa-miR816	4.33534	1.71135	0.394744	-1.34101	0.43922	DOWN	MIMAT0004061 Oryza sativa miR816
osa-miR810a	4.92408	1.15801	0.235173	-2.08821	0.185543	DOWN	MIMAT0004045 Oryza sativa miR810a
osa-miR7694-3p	6.29562	2.92069	0.463924	-1.10804	0.309673	DOWN	MIMAT0029960 Oryza sativa miR7694-3p
osa-miR7693-5p	4.33534	1.20934	0.278948	-1.84193	0.305861	DOWN	MIMAT0029957 Oryza sativa miR7693-5p
osa-miR7692-3p	2.84339	0.553341	0.194606	-2.36137	0.513787	DOWN	MIMAT0029956 Oryza sativa miR7692-3p
osa-miR6255	1.90674	0.553341	0.290203	-1.78487	0.755398	DOWN	MIMAT0024878 Oryza sativa miR6255
osa-miR5825	9.60733	4.68336	0.487478	-1.03659	0.121494	DOWN	MIMAT0023299 Oryza sativa miR5825
osa-miR5814	2.28808	0.604668	0.264268	-1.91993	0.639138	DOWN	MIMAT0023286 Oryza sativa miR5814
osa-miR5811	2.80995	0.604668	0.215188	-2.21633	0.566587	DOWN	MIMAT0023283 Oryza sativa miR5811
osa-miR5801c-3p	1.52539	0.604668	0.396402	-1.33496	0.856816	DOWN	MIMAT0044647 Oryza sativa miR5801c-3p
osa-miR5793	4.07441	1.20934	0.296813	-1.75237	0.330096	DOWN	MIMAT0023260 Oryza sativa miR5793
osa-miR5542	4.62971	1.20934	0.261212	-1.93671	0.238184	DOWN	MIMAT0022178 Oryza sativa miR5542
osa-miR5534b	2.80995	1.20934	0.430376	-1.21633	0.73003	DOWN	MIMAT0022170 Oryza sativa miR5534b
osa-miR5493	5.56636	2.31602	0.416074	-1.26509	0.293779	DOWN	MIMAT0022126 Oryza sativa miR5493
osa-miR5487	5.74032	2.21336	0.385582	-1.37489	0.290059	DOWN	MIMAT0022120 Oryza sativa miR5487
osa-miR535-3p	2.636	1.20934	0.458778	-1.12413	0.745802	DOWN	MIMAT0022927 Oryza sativa miR535-3p
osa-miR5340	4.33534	1.15801	0.267109	-1.9045	0.310403	DOWN	MIMAT0021413 Oryza sativa miR5340
osa-miR528-3p	6.32906	2.36735	0.374044	-1.41872	0.164716	DOWN	MIMAT0022926 Oryza sativa miR528-3p
osa-miR5153	1.90674	0.553341	0.290203	-1.78487	0.755398	DOWN	MIMAT0021103 Oryza sativa miR5153
osa-miR5146	4.24836	1.71135	0.402826	-1.31177	0.446283	DOWN	MIMAT0021091 Oryza sativa miR5146
osa-miR5076	4.24836	1.814	0.426989	-1.22773	0.43797	DOWN	MIMAT0020564 Oryza sativa miR5076
osa-miR5072	8.99849	3.52535	0.391772	-1.35191	0.0400378	DOWN	MIMAT0020552 Oryza sativa miR5072
osa-miR399i	3.10432	1.10668	0.356497	-1.48804	0.629314	DOWN	MIMAT0000992 Oryza sativa miR399i
osa-miR397a	5.86073	1.76268	0.300761	-1.73331	0.147629	DOWN	MIMAT0000980 Oryza sativa miR397a
osa-miR393b-3p	50.1908	23.6622	0.471445	-1.08484	0.0591455	DOWN	MIMAT0015123 Oryza sativa miR393b-3p
osa-miR319a-3p	5.94771	2.41867	0.406656	-1.29812	0.219307	DOWN	MIMAT0020915 Oryza sativa miR319a-3p
osa-miR2880	6.12166	1.814	0.296325	-1.75475	0.134983	DOWN	MIMAT0013832 Oryza sativa miR2880
osa-miR2878-3p	3.22473	0.553341	0.171593	-2.54294	0.411845	DOWN	MIMAT0013829 Oryza sativa miR2878-3p
osa-miR2873a	2.80995	1.10668	0.393844	-1.3443	0.739253	DOWN	MIMAT0013823 Oryza sativa miR2873a
osa-miR2871a-5p	9.17244	1.66002	0.180979	-2.4661	0.0048307	DOWN	MIMAT0020948 Oryza sativa miR2871a-5p
osa-miR2275b	3.1913	0.604668	0.189474	-2.39993	0.456915	DOWN	MIMAT0011759 Oryza sativa miR2275b
osa-miR2118o	5.39241	1.814	0.3364	-1.57175	0.2018	DOWN	MIMAT0011754 Oryza sativa miR2118o
osa-miR2118h	2.46204	1.20934	0.491193	-1.02564	0.762496	DOWN	MIMAT0011747 Oryza sativa miR2118h
osa-miR2100-5p	3.7466	1.20934	0.322782	-1.63137	0.478999	DOWN	MIMAT0010064 Oryza sativa miR2100-5p
osa-miR1875	5.86073	1.15801	0.197588	-2.33943	0.0888033	DOWN	MIMAT0007829 Oryza sativa miR1875
osa-miR1862f	4.54273	1.814	0.39932	-1.32438	0.352264	DOWN	MIMAT0019669 Oryza sativa miR1862f
osa-miR1860-3p	3.27828	0.553341	0.16879	-2.5667	0.45207	DOWN	MIMAT0007794 Oryza sativa miR1860-3p
osa-miR1857-5p	2.93037	0.604668	0.206346	-2.27687	0.493164	DOWN	MIMAT0007779 Oryza sativa miR1857-5p
osa-miR1850.2	5.56636	0.604668	0.108629	-3.20252	0.0651282	DOWN	MIMAT0009210 Oryza sativa miR1850.2
osa-miR1846d-5p	5.01106	2.26469	0.451939	-1.1458	0.389672	DOWN	MIMAT0007764 Oryza sativa miR1846d-5p
osa-miR169f.2	2.37506	0.604668	0.25459	-1.97375	0.626843	DOWN	MIMAT0020916 Oryza sativa miR169f.2
osa-miR169d	2.80995	0.604668	0.215188	-2.21633	0.566587	DOWN	MIMAT0001049 Oryza sativa miR169d
osa-miR169a	3.10432	1.10668	0.356497	-1.48804	0.629314	DOWN	MIMAT0000644 Oryza sativa miR169a
osa-miR168b	3.65962	0.553341	0.151202	-2.72545	0.353313	DOWN	MIMAT0001046 Oryza sativa miR168b
osa-miR166k-5p	3.48567	1.10668	0.317495	-1.65519	0.517752	DOWN	MIMAT0022870 Oryza sativa miR166k-5p
osa-miR166e-3p	1.14404	0.553341	0.483672	-1.0479	0.963153	DOWN	MIMAT0000639 Oryza sativa miR166e-3p
osa-miR160f-5p	16.5787	6.99938	0.422192	-1.24403	0.0153454	DOWN	MIMAT0001031 Oryza sativa miR160f-5p
osa-miR160f-3p	5.18501	2.41867	0.466474	-1.10013	0.37059	DOWN	MIMAT0022868 Oryza sativa miR160f-3p
osa-miR159a.2	5.21845	0.604668	0.115871	-3.10941	0.0792091	DOWN	MIMAT0009200 Oryza sativa miR159a.2
osa-miR156j-3p	5.01106	1.814	0.362	-1.46594	0.267024	DOWN	MIMAT0022850 Oryza sativa miR156j-3p
osa-miR156i	52.7398	22.6582	0.429622	-1.21886	0.0366001	DOWN	MIMAT0000626 Oryza sativa miR156i
osa-miR1441	7.82101	2.86936	0.366878	-1.44663	0.0937005	DOWN	MIMAT0005991 Oryza sativa miR1441
osa-miR11338-5p	3.69306	1.76268	0.477294	-1.06705	0.561466	DOWN	MIMAT0044630 Oryza sativa miR11338-5p
osa-miR812s	3.86702	8.10606	2.09621	1.06778	0.119658	UP	MIMAT0023267 Oryza sativa miR812s
osa-miR812o-3p	2.25465	4.73469	2.09997	1.07037	0.400785	UP	MIMAT0019682 Oryza sativa miR812o-3p
osa-miR6250	3.27828	7.60405	2.31953	1.21383	0.0865991	UP	MIMAT0024873 Oryza sativa miR6250
osa-miR6245	1.78632	4.68336	2.62179	1.39055	0.308737	UP	MIMAT0024865 Oryza sativa miR6245
osa-miR5806	2.66943	5.44201	2.03864	1.02761	0.475878	UP	MIMAT0023277 Oryza sativa miR5806
osa-miR5539b	0.849673	4.02737	4.73991	2.24486	0.263354	UP	MIMAT0031377 Oryza sativa miR5539b
osa-miR5534a	3.31171	8.55675	2.58378	1.36949	0.0503009	UP	MIMAT0022169 Oryza sativa miR5534a
osa-miR5504	0.381347	1.66002	4.35305	2.12203	0.772606	UP	MIMAT0022137 Oryza sativa miR5504
osa-miR5497	0.468325	1.10668	2.36306	1.24066	0.929056	UP	MIMAT0022130 Oryza sativa miR5497
osa-miR5491	0.93665	4.23268	4.51895	2.17599	0.241633	UP	MIMAT0022124 Oryza sativa miR5491
osa-miR5179	0.762695	1.66002	2.17652	1.12203	0.890289	UP	MIMAT0023306 Oryza sativa miR5179
osa-miR5158	0.762695	1.814	2.37841	1.25	0.888308	UP	MIMAT0021111 Oryza sativa miR5158
osa-miR5157b-3p	0.93665	2.7667	2.95383	1.56259	0.552504	UP	MIMAT0021110 Oryza sativa miR5157b-3p
osa-miR5156	0.381347	1.66002	4.35305	2.12203	0.772606	UP	MIMAT0021106 Oryza sativa miR5156
osa-miR5150-3p	3.01734	6.8454	2.26868	1.18186	0.150312	UP	MIMAT0021099 Oryza sativa miR5150-3p
osa-miR5144-3p	0.381347	1.15801	3.03662	1.60247	0.928313	UP	MIMAT0021089 Oryza sativa miR5144-3p
osa-miR5078	0.468325	1.814	3.87339	1.9536	0.759041	UP	MIMAT0020575 Oryza sativa miR5078
osa-miR414	1.8733	5.2367	2.79544	1.48308	0.201491	UP	MIMAT0001330 Oryza sativa miR414
osa-miR390-3p	0.381347	2.7667	7.25508	2.85899	0.450341	UP	MIMAT0022888 Oryza sativa miR390-3p
osa-miR2875	0.468325	4.63204	9.89064	3.30606	0.0985812	UP	MIMAT0013825 Oryza sativa miR2875
osa-miR2275c	2.636	5.79005	2.19653	1.13523	0.254336	UP	MIMAT0022147 Oryza sativa miR2275c
osa-miR2120	1.69935	4.73469	2.78619	1.47829	0.31036	UP	MIMAT0011179 Oryza sativa miR2120
osa-miR2118g	2.34163	5.08272	2.1706	1.11809	0.281838	UP	MIMAT0011746 Oryza sativa miR2118g
osa-miR2118d	0.381347	2.26469	5.93866	2.57014	0.601451	UP	MIMAT0011743 Oryza sativa miR2118d
osa-miR2095-5p	1.8733	3.97604	2.12248	1.08575	0.445572	UP	MIMAT0010054 Oryza sativa miR2095-5p
osa-miR2094-3p	2.46204	6.39471	2.59732	1.37703	0.169275	UP	MIMAT0010053 Oryza sativa miR2094-3p
osa-miR1872	1.52539	6.89673	4.52129	2.17673	0.0468133	UP	MIMAT0007825 Oryza sativa miR1872
osa-miR1864	1.14404	7.19343	6.28773	2.65254	0.0154814	UP	MIMAT0007814 Oryza sativa miR1864
osa-miR1846d-3p	1.14404	2.41867	2.11415	1.08007	0.838856	UP	MIMAT0007765 Oryza sativa miR1846d-3p
osa-miR172a	0.381347	1.10668	2.90203	1.53706	0.927039	UP	MIMAT0001069 Oryza sativa miR172a
osa-miR171i-3p	1.318	6.79407	5.15484	2.36593	0.026593	UP	MIMAT0001085 Oryza sativa miR171i-3p
osa-miR171d-5p	1.52539	4.0787	2.67387	1.41893	0.457446	UP	MIMAT0022878 Oryza sativa miR171d-5p
osa-miR166i-3p	0.849673	1.71135	2.01413	1.01016	0.888499	UP	MIMAT0001074 Oryza sativa miR166i-3p
osa-miR164e	3.95399	10.1767	2.57378	1.36389	0.0283891	UP	MIMAT0001035 Oryza sativa miR164e
osa-miR159c	2.72297	5.84137	2.14522	1.10112	0.250124	UP	MIMAT0001024 Oryza sativa miR159c
osa-miR1437b-3p	0.468325	2.26469	4.83572	2.27373	0.593265	UP	MIMAT0029954 Oryza sativa miR1437b-3p
osa-miR1429-5p	1.23102	2.92069	2.37257	1.24645	0.665328	UP	MIMAT0009208 Oryza sativa miR1429-5p
osa-miR1425-5p	1.14404	5.8927	5.15077	2.36479	0.0870828	UP	MIMAT0005959 Oryza sativa miR1425-5p
osa-miR11344-5p	1.52539	3.92471	2.57293	1.36341	0.465181	UP	MIMAT0044642 Oryza sativa miR11344-5p
osa-miR11342-3p	1.99371	4.78602	2.40055	1.26337	0.408425	UP	MIMAT0044639 Oryza sativa miR11342-3p
Supplementary Table S7B. List of Differentially Expressed novel miRNA in SP grown under Sun and Shade condition. DEm with Log2 FC ≥1.00 is considered as Up- and ≤-1.00 is considered as Down-regulated.
miRNA	Expression_Sun	Expression_Shade	FoldChange	log2FoldChange	P Value	Regulation
CCGGTGGGACCTTTTTTTTTA	4.7292	12.8364	2.71429	1.44057	0.365787	UP
CAACAGCTGTCATTTTGTCCA	4.0536	1.689	0.416667	-1.26303	1	DOWN
CCGGTGGGACCTTTTTTTTC	12.1608	12.1608	1	0	1	NEUTRAL

## Sheet: Table S8
Supplementary Table S8A. List of known miRNA expressed uniquely under sun in Swarnaprabha Panicles						Supplementary Table S8B. List of known miRNA expressed uniquely under shade in Swarnaprabha Panicles
miRNA	Expression_Sun	P Value	Accession			miRNA	Expression_Shade	P Value	Accession
osa-miR5492	1.14404	0.750752	MIMAT0022125 Oryza sativa miR5492			osa-miR5795	1.76268	0.595959	MIMAT0023263 Oryza sativa miR5795
osa-miR5820	0.93665	0.832319	MIMAT0023293 Oryza sativa miR5820			osa-miR2098-3p	0.604668	0.87916	MIMAT0010061 Oryza sativa miR2098-3p
osa-miR11337-3p	3.86702	0.162568	MIMAT0044629 Oryza sativa miR11337-3p			osa-miR5833	0.553341	0.85969	MIMAT0023308 Oryza sativa miR5833
osa-miR156f-3p	2.08069	0.557758	MIMAT0022847 Oryza sativa miR156f-3p			osa-miR1848	0.553341	0.85969	MIMAT0007768 Oryza sativa miR1848
osa-miR1860-5p	0.93665	0.832319	MIMAT0007793 Oryza sativa miR1860-5p			osa-miR5337a	3.62801	0.159079	MIMAT0021410 Oryza sativa miR5337a
osa-miR5517	1.8733	0.635264	MIMAT0022151 Oryza sativa miR5517			osa-miR7695-5p	0.553341	0.85969	MIMAT0029961 Oryza sativa miR7695-5p
osa-miR1861a	3.43213	0.214302	MIMAT0007796 Oryza sativa miR1861a			osa-miR2870	1.66002	0.604732	MIMAT0013817 Oryza sativa miR2870
osa-miR2118i	2.34163	0.511569	MIMAT0011748 Oryza sativa miR2118i			osa-miR160b-3p	3.02334	0.271702	MIMAT0022852 Oryza sativa miR160b-3p
osa-miR2105	1.8733	0.635264	MIMAT0010073 Oryza sativa miR2105			osa-miR5516b	1.66002	0.604732	MIMAT0023315 Oryza sativa miR5516b
osa-miR5162	3.69306	0.182094	MIMAT0021115 Oryza sativa miR5162			osa-miR395t	2.7667	0.303661	MIMAT0000969 Oryza sativa miR395t
osa-miR5489	1.8733	0.635264	MIMAT0022122 Oryza sativa miR5489			osa-miR1320-3p	4.0787	0.0931008	MIMAT0015286 Oryza sativa miR1320-3p
osa-miR2866	1.90674	0.587235	MIMAT0013813 Oryza sativa miR2866			osa-miR3982-3p	1.20934	0.72826	MIMAT0019687 Oryza sativa miR3982-3p
osa-miR5797	5.39241	0.0299644	MIMAT0023265 Oryza sativa miR5797			osa-miR2095-3p	4.98007	0.0261924	MIMAT0010055 Oryza sativa miR2095-3p
osa-miR1442	3.05078	0.29143	MIMAT0005992 Oryza sativa miR1442			osa-miR169r-5p	7.05071	0.00138756	MIMAT0026762 Oryza sativa miR169r-5p
osa-miR2091-5p	1.52539	0.680854	MIMAT0010046 Oryza sativa miR2091-5p			osa-miR5152-5p	0.604668	0.87916	MIMAT0021101 Oryza sativa miR5152-5p
osa-miR5819	1.90674	0.587235	MIMAT0023292 Oryza sativa miR5819			osa-miR3979-5p	1.814	0.590821	MIMAT0019673 Oryza sativa miR3979-5p
osa-miR419	1.52539	0.680854	MIMAT0001335 Oryza sativa miR419			osa-miR1440a	4.78602	0.0421573	MIMAT0005990 Oryza sativa miR1440a
osa-miR5527	1.14404	0.750752	MIMAT0022162 Oryza sativa miR5527			osa-miR166i-5p	2.86936	0.290749	MIMAT0022883 Oryza sativa miR166i-5p
osa-miR2871b-5p	0.93665	0.832319	MIMAT0037363 Oryza sativa miR2871b-5p			osa-miR7695-3p	2.21336	0.454344	MIMAT0029962 Oryza sativa miR7695-3p
osa-miR171f-5p	3.31171	0.252796	MIMAT0022880 Oryza sativa miR171f-5p			osa-miR1847.2	2.41867	0.422551	MIMAT0007767 Oryza sativa miR1847.2
osa-miR2865	2.93037	0.336053	MIMAT0013812 Oryza sativa miR2865			osa-miR2097-3p	1.20934	0.72826	MIMAT0010059 Oryza sativa miR2097-3p
osa-miR395c	2.66943	0.379172	MIMAT0000972 Oryza sativa miR395c			osa-miR5521	1.814	0.590821	MIMAT0022155 Oryza sativa miR5521
osa-miR2103	0.93665	0.832319	MIMAT0010071 Oryza sativa miR2103			osa-miR395x	1.10668	0.715313	MIMAT0014124 Oryza sativa miR395x
osa-miR5796	2.34163	0.511569	MIMAT0023264 Oryza sativa miR5796			osa-miR1852	6.94805	0.00151151	MIMAT0007772 Oryza sativa miR1852
osa-miR5525	0.762695	0.80625	MIMAT0022160 Oryza sativa miR5525			osa-miR2873b	5.13405	0.022975	MIMAT0019685 Oryza sativa miR2873b
osa-miR5515	1.52539	0.680854	MIMAT0022149 Oryza sativa miR5515			osa-miR1861d	0.553341	0.85969	MIMAT0007799 Oryza sativa miR1861d
osa-miR5803	3.98743	0.134518	MIMAT0023274 Oryza sativa miR5803			osa-miR1863b	1.20934	0.72826	MIMAT0013836 Oryza sativa miR1863b
osa-miR1429-3p	0.93665	0.832319	MIMAT0005963 Oryza sativa miR1429-3p			osa-miR169i-5p.1	3.02334	0.271702	MIMAT0001054 Oryza sativa miR169i-5p.1
osa-miR5151	1.90674	0.587235	MIMAT0021100 Oryza sativa miR5151			osa-miR1846b-3p	1.66002	0.604732	MIMAT0007791 Oryza sativa miR1846b-3p
osa-miR5505	2.34163	0.511569	MIMAT0022138 Oryza sativa miR5505			osa-miR1857-3p	1.20934	0.72826	MIMAT0007780 Oryza sativa miR1857-3p
osa-miR5827	3.27828	0.283917	MIMAT0023301 Oryza sativa miR5827			osa-miR2104	1.814	0.590821	MIMAT0010072 Oryza sativa miR2104
osa-miR5512b	6.03469	0.014846	MIMAT0024872 Oryza sativa miR5512b			osa-miR1851	2.26469	0.446902	MIMAT0007771 Oryza sativa miR1851
osa-miR5337b	2.80995	0.387578	MIMAT0024870 Oryza sativa miR5337b			osa-miR1428f-5p	2.21336	0.454344	MIMAT0010043 Oryza sativa miR1428f-5p
osa-miR169p	2.34163	0.511569	MIMAT0001061 Oryza sativa miR169p			osa-miR2102-5p	0.553341	0.85969	MIMAT0010068 Oryza sativa miR2102-5p
osa-miR5532	1.8733	0.635264	MIMAT0022167 Oryza sativa miR5532			osa-miR5496	2.41867	0.422551	MIMAT0022129 Oryza sativa miR5496
osa-miR169i-5p.2	2.66943	0.379172	MIMAT0020917 Oryza sativa miR169i-5p.2			osa-miR1428e-3p	1.814	0.590821	MIMAT0007785 Oryza sativa miR1428e-3p
osa-miR5079a	2.66943	0.379172	MIMAT0020578 Oryza sativa miR5079a			osa-miR6246	0.604668	0.87916	MIMAT0024867 Oryza sativa miR6246
osa-miR2874	2.28808	0.48539	MIMAT0013824 Oryza sativa miR2874			osa-miR5538	1.10668	0.715313	MIMAT0022174 Oryza sativa miR5538
osa-miR437	1.52539	0.680854	MIMAT0001586 Oryza sativa miR437			osa-miR5161	1.814	0.590821	MIMAT0021114 Oryza sativa miR5161
						osa-miR5514	1.20934	0.72826	MIMAT0022148 Oryza sativa miR5514
						osa-miR395w	1.10668	0.715313	MIMAT0003877 Oryza sativa miR395w
						osa-miR5528	0.604668	0.87916	MIMAT0022163 Oryza sativa miR5528
Supplementary Table S8C. List of Novel miRNA expressed only under sun in Swarnaprabha Panicles						Supplementary Table S8D. List of Novel miRNA expressed only under shade in Swarnaprabha Panicles
Novel miR expressed only in Sun						Novel miR expressed only under Shade
miRNA	Expression in Sun	P Value				miRNA	Expression under Shade	P Value
CTACTTCCGTTGTAGTCTGTA	3.378	0.810707				CTAATTGATAACTTTGAATTTC	2.3646	0.727101
CCACGGACGGCGCCAGGTGT	4.45896	0.715861				GGCCCATGGGCCACCAAGCCC	1.689	0.706171
CGCGCCTACGGCGAGGGCGTGC	3.378	0.810707				AATTTCCGTAGTAGTCTAACTCA	6.756	0.685037
TGTATGGCTCTGATACCAGCTCT	8.7828	0.669945				CCGGTGGGACCTTTTTTTTT	4.7292	0.678766
TAAATCCGTTGTAGTCTAGCT	2.43216	0.749132				CGCCGCCGGCGGGGGCAGCGG	1.689	0.706171
GAAAATCCGACTTTTTGCAA	3.378	0.810707				GCCAGAGAGGGCGCCACTGCCG	4.0536	0.767915
AAGATCCGTTGTAGTCTAGCTGG	4.86432	0.692842				CTTTGGGGGATGTGGCAGCA	1.689	0.706171
GCGGCGTGTTGCATGCCTGCATG	6.0804	0.700958				CCGCCTCGAAGCTCCCTGCGC	3.378	0.78806
AGCCGCCTGGGCGTCTCGCTACT	2.0268	0.739158				TAGTATCCGACTGTTTATGTCG	6.0804	0.681872
AGATTATAGAGTTTAAATCCCT	5.81016	0.676434				CCACGGACGGCGCCACCGCC	4.0536	0.767915
CTCACGCACCTCCACCACCTCC	2.43216	0.749132				ATAGATATCGAGTTTAATAC	3.378	0.78806
CATCCAGTTGGTAGAGCATTTCC	2.83752	0.75314				CGCCGCCGGCGGGGGCCTTCCGC	2.3646	0.727101
CGCCGCCGGCGGGGGCCTTCCG	3.378	0.810707				TCAATTGGCAGTTCTTAGGCA	2.0268	0.720325
TCGTGCCGGCGGGGGCCGGGCT	3.378	0.810707				GCGCACAACGGAACCACACC	3.378	0.78806
TAAATCCGTTGTAGTCTAGCTGG	3.378	0.810707				GTAGTAGCAGCTAGATTAAT	4.0536	0.767915
CGGCTTCATGTCTCCAACATG	3.378	0.810707
ACAGTGTTGCATCCCTGCTAG	6.756	0.705436
CTAGGCACGGATTCGAGGAGA	4.0536	0.790571
CCCACTTCTGTCACCTTCGT	2.0268	0.739158
CCACCGCTGCCACCAGTTCT	4.0536	0.790571
AAAGTATCAAGTTTAAATTCAT	2.43216	0.749132
TGTGTTTGTATGGTTAGCTGTG	4.7292	0.758095
ACGTCATCGTGGTCGCCAAGTCG	4.0536	0.790571
GATACGCACGGATACGTATCCC	4.0536	0.790571

## Sheet: Table S9
Supplementary Table S9. List of Neutrally Regulated known miRNA in SP grown under Sun and Shade condition. DEm with Log2 FC between ≥1.00 and ≤-1.00 are considered as Neutrally-regulated.
miRNA	Expression_Sun	Expression_Shade	Fold Change	log2 Fold Change	P Value	Regulation	Accession
osa-miR1874-3p	24.694	13.6908	0.554417	-0.850956	0.107678	NEUTRAL	MIMAT0007828 Oryza sativa miR1874-3p
osa-miR827	5.94771	10.4221	1.75229	0.809238	0.151337	NEUTRAL	MIMAT0009981 Oryza sativa miR827
osa-miR812q	8.87807	4.73469	0.533302	-0.906976	0.158453	NEUTRAL	MIMAT0023255 Oryza sativa miR812q
osa-miR1878	11.2866	6.94805	0.615604	-0.699926	0.160756	NEUTRAL	MIMAT0007835 Oryza sativa miR1878
osa-miR5073	11.3937	6.49737	0.570262	-0.810303	0.170832	NEUTRAL	MIMAT0020555 Oryza sativa miR5073
osa-miR2867-5p	7.59351	4.02737	0.53037	-0.91493	0.185742	NEUTRAL	MIMAT0013814 Oryza sativa miR2867-5p
osa-miR5154	8.06184	4.52938	0.56183	-0.831794	0.210266	NEUTRAL	MIMAT0021104 Oryza sativa miR5154
osa-miR1423-5p	5.86073	9.76609	1.66636	0.7367	0.211358	NEUTRAL	MIMAT0015244 Oryza sativa miR1423-5p
osa-miR535-5p	13.0395	19.8401	1.52155	0.605538	0.217576	NEUTRAL	MIMAT0003142 Oryza sativa miR535-5p
osa-miR528-5p	10.6109	6.89673	0.649969	-0.621557	0.24827	NEUTRAL	MIMAT0002884 Oryza sativa miR528-5p
osa-miR530-3p	6.06812	9.6121	1.58403	0.663602	0.279383	NEUTRAL	MIMAT0002886 Oryza sativa miR530-3p
osa-miR5502	5.77375	9.26407	1.60452	0.682137	0.289519	NEUTRAL	MIMAT0022135 Oryza sativa miR5502
osa-miR166a-3p	11.1327	15.5048	1.39272	0.477909	0.29036	NEUTRAL	MIMAT0000635 Oryza sativa miR166a-3p
osa-miR164c	5.47938	8.71073	1.58973	0.668781	0.300059	NEUTRAL	MIMAT0001033 Oryza sativa miR164c
osa-miR5485	7.17873	4.0787	0.568164	-0.81562	0.306409	NEUTRAL	MIMAT0022118 Oryza sativa miR5485
osa-miR1319b	7.17873	4.0787	0.568164	-0.81562	0.306409	NEUTRAL	MIMAT0023298 Oryza sativa miR1319b
osa-miR810b.2	8.23579	5.28803	0.642079	-0.639177	0.307423	NEUTRAL	MIMAT0005978 Oryza sativa miR810b.2
osa-miR1861g	3.31171	6.24073	1.88444	0.914138	0.311795	NEUTRAL	MIMAT0007802 Oryza sativa miR1861g
osa-miR6245b-3p	5.86073	2.97201	0.507106	-0.97964	0.325925	NEUTRAL	MIMAT0044649 Oryza sativa miR6245b-3p
osa-miR818a	7.38612	4.63204	0.627127	-0.67317	0.345272	NEUTRAL	MIMAT0004063 Oryza sativa miR818a
osa-miR5792	6.50301	3.62801	0.557897	-0.84193	0.347057	NEUTRAL	MIMAT0023259 Oryza sativa miR5792
osa-miR5075	6.24208	3.62801	0.581218	-0.782848	0.355912	NEUTRAL	MIMAT0020561 Oryza sativa miR5075
osa-miR390-5p	6.7104	9.81741	1.46301	0.548944	0.358139	NEUTRAL	MIMAT0001588 Oryza sativa miR390-5p
osa-miR5526	4.33534	6.99938	1.61449	0.691082	0.359904	NEUTRAL	MIMAT0022161 Oryza sativa miR5526
osa-miR171d-3p	6.24208	3.47403	0.55655	-0.845417	0.361623	NEUTRAL	MIMAT0001065 Oryza sativa miR171d-3p
osa-miR160d-5p	9.72775	13.2914	1.36634	0.45032	0.364361	NEUTRAL	MIMAT0000631 Oryza sativa miR160d-5p
osa-miR5540	5.56636	7.95208	1.4286	0.514598	0.405074	NEUTRAL	MIMAT0022176 Oryza sativa miR5540
osa-miR166e-5p	5.47938	8.20872	1.49811	0.583143	0.405074	NEUTRAL	MIMAT0022859 Oryza sativa miR166e-5p
osa-miR397b	7.17873	4.63204	0.645245	-0.632082	0.430165	NEUTRAL	MIMAT0000981 Oryza sativa miR397b
osa-miR1883a	3.39869	5.8927	1.73381	0.79395	0.431182	NEUTRAL	MIMAT0007851 Oryza sativa miR1883a
osa-miR394	8.23579	5.79005	0.703034	-0.508333	0.432892	NEUTRAL	MIMAT0000958 Oryza sativa miR394
osa-miR812r	6.03469	3.57668	0.592687	-0.754657	0.443971	NEUTRAL	MIMAT0023262 Oryza sativa miR812r
osa-miR168a-3p	4.54273	6.89673	1.51819	0.602352	0.463699	NEUTRAL	MIMAT0015122 Oryza sativa miR168a-3p
osa-miR164b	43.8351	65.1565	1.4864	0.571823	0.467741	NEUTRAL	MIMAT0000634 Oryza sativa miR164b
osa-miR5519	3.10432	5.13405	1.65384	0.72582	0.472647	NEUTRAL	MIMAT0022153 Oryza sativa miR5519
osa-miR7694-5p	7.38612	4.98007	0.674247	-0.568651	0.47838	NEUTRAL	MIMAT0029959 Oryza sativa miR7694-5p
osa-miR166m	9.13901	6.29206	0.688484	-0.538505	0.482934	NEUTRAL	MIMAT0001087 Oryza sativa miR166m
osa-miR1876	33.0168	24.7689	0.75019	-0.414673	0.489217	NEUTRAL	MIMAT0007831 Oryza sativa miR1876
osa-miR399b	4.07441	6.44604	1.58208	0.661823	0.500935	NEUTRAL	MIMAT0000985 Oryza sativa miR399b
osa-miR396c-5p	14.6518	11.7341	0.800861	-0.320377	0.507271	NEUTRAL	MIMAT0000979 Oryza sativa miR396c-5p
osa-miR529a	7.85445	5.79005	0.737168	-0.439935	0.524168	NEUTRAL	MIMAT0002885 Oryza sativa miR529a
osa-miR5144-5p	5.56636	7.45007	1.33841	0.420519	0.534625	NEUTRAL	MIMAT0021088 Oryza sativa miR5144-5p
osa-miR5791	5.39241	7.5014	1.3911	0.47623	0.535859	NEUTRAL	MIMAT0023258 Oryza sativa miR5791
osa-miR399j	7.56008	9.76609	1.2918	0.36938	0.543405	NEUTRAL	MIMAT0000993 Oryza sativa miR399j
osa-miR1846c-5p	9.37983	12.1848	1.29904	0.377443	0.547672	NEUTRAL	MIMAT0009165 Oryza sativa miR1846c-5p
osa-miR814c	5.82729	3.4227	0.587357	-0.767691	0.548395	NEUTRAL	MIMAT0004057 Oryza sativa miR814c
osa-miR1319a	2.16767	4.13002	1.90528	0.930004	0.556331	NEUTRAL	MIMAT0009136 Oryza sativa miR1319a
osa-miR166l-3p	20.3386	25.2196	1.23999	0.310323	0.560074	NEUTRAL	MIMAT0001038 Oryza sativa miR166l-3p
osa-miR444b.2	9.52035	11.5801	1.21635	0.28256	0.568424	NEUTRAL	MIMAT0005968 Oryza sativa miR444b.2
osa-miR11343-3p	5.09804	6.94805	1.36289	0.446668	0.571793	NEUTRAL	MIMAT0044641 Oryza sativa miR11343-3p
osa-miR393b-5p	5.18501	6.8454	1.32023	0.400787	0.571973	NEUTRAL	MIMAT0001078 Oryza sativa miR393b-5p
osa-miR1871	5.01106	6.99938	1.39679	0.482112	0.572203	NEUTRAL	MIMAT0007824 Oryza sativa miR1871
osa-miR11336-3p	5.21845	3.4227	0.655884	-0.608486	0.573664	NEUTRAL	MIMAT0044627 Oryza sativa miR11336-3p
osa-miR319b	84.7933	56.7312	0.669053	-0.579808	0.574582	NEUTRAL	MIMAT0001029 Oryza sativa miR319b
osa-miR5147	7.17873	5.18538	0.722325	-0.469279	0.577394	NEUTRAL	MIMAT0021092 Oryza sativa miR5147
osa-miR2872	4.33534	2.41867	0.557897	-0.84193	0.578137	NEUTRAL	MIMAT0013822 Oryza sativa miR2872
osa-miR1874-5p	9.9017	7.34741	0.742036	-0.43044	0.580058	NEUTRAL	MIMAT0007827 Oryza sativa miR1874-5p
osa-miR1859	4.33534	2.36735	0.546058	-0.872875	0.581272	NEUTRAL	MIMAT0007792 Oryza sativa miR1859
osa-miR2871b-3p	3.39869	5.2367	1.5408	0.62368	0.585375	NEUTRAL	MIMAT0013821 Oryza sativa miR2871b-3p
osa-miR159a.1	54.9343	41.483	0.755138	-0.405188	0.592238	NEUTRAL	MIMAT0001022 Oryza sativa miR159a.1
osa-miR156l-5p	5.94771	4.02737	0.677129	-0.562496	0.601108	NEUTRAL	MIMAT0001021 Oryza sativa miR156l-5p
osa-miR1870-3p	4.07441	2.31602	0.568431	-0.814944	0.601598	NEUTRAL	MIMAT0015270 Oryza sativa miR1870-3p
osa-miR396f-5p	14.0631	16.8168	1.19581	0.25799	0.607295	NEUTRAL	MIMAT0010070 Oryza sativa miR396f-5p
osa-miR2118r	5.5998	4.13002	0.737531	-0.439225	0.609002	NEUTRAL	MIMAT0011757 Oryza sativa miR2118r
osa-miR1432-5p	4.62971	6.1894	1.33689	0.418879	0.616675	NEUTRAL	MIMAT0005966 Oryza sativa miR1432-5p
osa-miR5802	6.24208	8.05474	1.29039	0.367811	0.623564	NEUTRAL	MIMAT0023271 Oryza sativa miR5802
osa-miR812e	6.32906	8.05474	1.27266	0.347847	0.623564	NEUTRAL	MIMAT0004053 Oryza sativa miR812e
osa-miR395e	4.80367	2.86936	0.597327	-0.743407	0.627084	NEUTRAL	MIMAT0000961 Oryza sativa miR395e
osa-miR5788	7.64705	5.73872	0.750448	-0.414175	0.627473	NEUTRAL	MIMAT0023253 Oryza sativa miR5788
osa-miR396a-5p	8.87807	6.94805	0.782608	-0.353638	0.628134	NEUTRAL	MIMAT0000977 Oryza sativa miR396a-5p
osa-miR812p	3.01734	4.63204	1.53514	0.618368	0.631595	NEUTRAL	MIMAT0023254 Oryza sativa miR812p
osa-miR5799	2.93037	4.58071	1.56319	0.644491	0.63372	NEUTRAL	MIMAT0023268 Oryza sativa miR5799
osa-miR167a-3p	2.75641	4.68336	1.69908	0.764755	0.634777	NEUTRAL	MIMAT0006780 Oryza sativa miR167a-3p
osa-miR812v	4.62971	2.86936	0.619771	-0.690193	0.635645	NEUTRAL	MIMAT0023278 Oryza sativa miR812v
osa-miR5148b	4.62971	2.86936	0.619771	-0.690193	0.635645	NEUTRAL	MIMAT0021095 Oryza sativa miR5148b
osa-miR167h-3p	10.1091	12.0821	1.19517	0.257218	0.641886	NEUTRAL	MIMAT0022874 Oryza sativa miR167h-3p
osa-miR815a	6.41603	4.68336	0.729947	-0.454137	0.643545	NEUTRAL	MIMAT0004058 Oryza sativa miR815a
osa-miR812g	5.94771	7.5014	1.26122	0.334825	0.654442	NEUTRAL	MIMAT0007847 Oryza sativa miR812g
osa-miR1425-3p	6.12166	7.5014	1.22539	0.293235	0.654442	NEUTRAL	MIMAT0020933 Oryza sativa miR1425-3p
osa-miR167e-3p	5.27199	3.47403	0.658959	-0.601739	0.669261	NEUTRAL	MIMAT0022873 Oryza sativa miR167e-3p
osa-miR2093-3p	5.01106	3.62801	0.724001	-0.465937	0.673228	NEUTRAL	MIMAT0010051 Oryza sativa miR2093-3p
osa-miR159f	6.95123	9.11009	1.31057	0.390197	0.676424	NEUTRAL	MIMAT0001027 Oryza sativa miR159f
osa-miR1850.3	2.80995	3.97604	1.41499	0.500788	0.676827	NEUTRAL	MIMAT0009211 Oryza sativa miR1850.3
osa-miR5817	2.54902	4.02737	1.57997	0.659896	0.680094	NEUTRAL	MIMAT0023290 Oryza sativa miR5817
osa-miR11340-3p	2.54902	4.02737	1.57997	0.659896	0.680094	NEUTRAL	MIMAT0044635 Oryza sativa miR11340-3p
osa-miR1881	4.92408	3.47403	0.705518	-0.503245	0.682753	NEUTRAL	MIMAT0007838 Oryza sativa miR1881
osa-miR444d.3	4.04097	2.31602	0.573134	-0.803055	0.697294	NEUTRAL	MIMAT0005972 Oryza sativa miR444d.3
osa-miR408-3p	3.78004	2.41867	0.639854	-0.644185	0.706514	NEUTRAL	MIMAT0001079 Oryza sativa miR408-3p
osa-miR529b	3.95399	5.08272	1.28547	0.362291	0.707436	NEUTRAL	MIMAT0005015 Oryza sativa miR529b
osa-miR2093-5p	3.69306	5.2367	1.41799	0.503842	0.708359	NEUTRAL	MIMAT0010050 Oryza sativa miR2093-5p
osa-miR166j-5p	3.78004	2.36735	0.626276	-0.67513	0.709605	NEUTRAL	MIMAT0022887 Oryza sativa miR166j-5p
osa-miR6253	1.90674	3.57668	1.87581	0.907516	0.732304	NEUTRAL	MIMAT0024876 Oryza sativa miR6253
osa-miR11340-5p	8.5837	6.89673	0.803468	-0.315688	0.733764	NEUTRAL	MIMAT0044634 Oryza sativa miR11340-5p
osa-miR2121a	8.32277	6.94805	0.834825	-0.260455	0.733764	NEUTRAL	MIMAT0011180 Oryza sativa miR2121a
osa-miR5149	1.90674	3.4227	1.79506	0.844029	0.734745	NEUTRAL	MIMAT0021097 Oryza sativa miR5149
osa-miR166b-5p	7.09175	5.73872	0.80921	-0.305413	0.743493	NEUTRAL	MIMAT0022856 Oryza sativa miR166b-5p
osa-miR1863c	4.33534	3.02334	0.697371	-0.520002	0.745138	NEUTRAL	MIMAT0013830 Oryza sativa miR1863c
osa-miR812f	3.39869	4.73469	1.39309	0.478291	0.756555	NEUTRAL	MIMAT0007821 Oryza sativa miR812f
osa-miR443	3.48567	4.63204	1.32888	0.410211	0.756641	NEUTRAL	MIMAT0001606 Oryza sativa miR443
osa-miR5082	3.39869	4.63204	1.36289	0.446668	0.757091	NEUTRAL	MIMAT0020582 Oryza sativa miR5082
osa-miR5513	5.86073	4.47805	0.764078	-0.388208	0.773519	NEUTRAL	MIMAT0022146 Oryza sativa miR5513
osa-miR2098-5p	3.27828	1.66002	0.506371	-0.981734	0.779082	NEUTRAL	MIMAT0010060 Oryza sativa miR2098-5p
osa-miR167d-3p	4.54273	5.8927	1.29717	0.375368	0.786396	NEUTRAL	MIMAT0022872 Oryza sativa miR167d-3p
osa-miR1868	3.01734	1.76268	0.584182	-0.77551	0.790081	NEUTRAL	MIMAT0007820 Oryza sativa miR1868
osa-miR5801c-5p	4.80367	3.47403	0.723203	-0.467527	0.796967	NEUTRAL	MIMAT0044646 Oryza sativa miR5801c-5p
osa-miR812n-3p	2.93037	1.71135	0.584006	-0.775946	0.799939	NEUTRAL	MIMAT0019680 Oryza sativa miR812n-3p
osa-miR439c	2.84339	1.76268	0.619922	-0.689842	0.802518	NEUTRAL	MIMAT0001591 Oryza sativa miR439c
osa-miR2094-5p	2.93037	3.97604	1.35684	0.440252	0.806945	NEUTRAL	MIMAT0010052 Oryza sativa miR2094-5p
osa-miR6248	2.93037	3.97604	1.35684	0.440252	0.806945	NEUTRAL	MIMAT0024869 Oryza sativa miR6248
osa-miR2864.2	2.93037	4.02737	1.37436	0.458757	0.806965	NEUTRAL	MIMAT0013811 Oryza sativa miR2864.2
osa-miR5801b	2.93037	4.13002	1.40939	0.495069	0.806972	NEUTRAL	MIMAT0023280 Oryza sativa miR5801b
osa-miR11337-5p	4.45575	3.37137	0.756633	-0.402334	0.812622	NEUTRAL	MIMAT0044628 Oryza sativa miR11337-5p
osa-miR5824	2.75641	1.71135	0.620862	-0.687655	0.812652	NEUTRAL	MIMAT0023297 Oryza sativa miR5824
osa-miR5809	6.50301	5.13405	0.789488	-0.34101	0.817309	NEUTRAL	MIMAT0023281 Oryza sativa miR5809
osa-miR2106	4.2818	3.37137	0.787373	-0.344881	0.819323	NEUTRAL	MIMAT0010074 Oryza sativa miR2106
osa-miR1862e	5.94771	6.94805	1.16819	0.224275	0.820205	NEUTRAL	MIMAT0007833 Oryza sativa miR1862e
osa-miR399d	5.86073	6.89673	1.17677	0.234831	0.82084	NEUTRAL	MIMAT0000987 Oryza sativa miR399d
osa-miR166c-5p	5.77375	6.94805	1.20339	0.2671	0.820996	NEUTRAL	MIMAT0022857 Oryza sativa miR166c-5p
osa-miR167f	63.8459	55.9951	0.877035	-0.189294	0.821998	NEUTRAL	MIMAT0001041 Oryza sativa miR167f
osa-miR1439	5.18501	3.97604	0.766833	-0.383015	0.848952	NEUTRAL	MIMAT0005993 Oryza sativa miR1439
osa-miR5150-5p	4.92408	4.0787	0.828316	-0.271746	0.852802	NEUTRAL	MIMAT0021098 Oryza sativa miR5150-5p
osa-miR1437b-5p	2.28808	3.47403	1.51831	0.602469	0.856864	NEUTRAL	MIMAT0029953 Oryza sativa miR1437b-5p
osa-miR435	2.28808	3.52535	1.54074	0.623628	0.857165	NEUTRAL	MIMAT0001585 Oryza sativa miR435
osa-miR6252	2.37506	3.47403	1.46271	0.548644	0.857366	NEUTRAL	MIMAT0024875 Oryza sativa miR6252
osa-miR818f	2.636	3.52535	1.33739	0.41942	0.858802	NEUTRAL	MIMAT0026335 Oryza sativa miR818f
osa-miR444f	2.34163	1.20934	0.516452	-0.953295	0.860855	NEUTRAL	MIMAT0005976 Oryza sativa miR444f
osa-miR5077	8.87807	9.76609	1.10002	0.137534	0.863779	NEUTRAL	MIMAT0020574 Oryza sativa miR5077
osa-miR166h-5p	6.79738	5.73872	0.844254	-0.24425	0.868531	NEUTRAL	MIMAT0022882 Oryza sativa miR166h-5p
osa-miR172b	5.21845	6.44604	1.23524	0.304792	0.868615	NEUTRAL	MIMAT0001070 Oryza sativa miR172b
osa-miR812o-5p	6.62343	5.73872	0.866428	-0.206849	0.869454	NEUTRAL	MIMAT0019681 Oryza sativa miR812o-5p
osa-miR167a-5p	22.9613	23.9188	1.0417	0.0589448	0.873082	NEUTRAL	MIMAT0000641 Oryza sativa miR167a-5p
osa-miR166g-3p	12.6581	11.5288	0.910781	-0.134824	0.884943	NEUTRAL	MIMAT0001072 Oryza sativa miR166g-3p
osa-miR168a-5p	24.413	23.1089	0.94658	-0.0792043	0.887257	NEUTRAL	MIMAT0001045 Oryza sativa miR168a-5p
osa-miR5074	3.95399	4.63204	1.17148	0.228336	0.888403	NEUTRAL	MIMAT0020559 Oryza sativa miR5074
osa-miR2863c	1.90674	1.20934	0.634244	-0.656891	0.891404	NEUTRAL	MIMAT0021093 Oryza sativa miR2863c
osa-miR5816	5.30543	4.52938	0.853726	-0.228155	0.903791	NEUTRAL	MIMAT0023288 Oryza sativa miR5816
osa-miR5159	1.90674	2.86936	1.50485	0.589623	0.90758	NEUTRAL	MIMAT0021112 Oryza sativa miR5159
osa-miR11341-5p	2.16767	2.81803	1.30003	0.378543	0.909963	NEUTRAL	MIMAT0044636 Oryza sativa miR11341-5p
osa-miR2873c	2.25465	2.7667	1.22711	0.295267	0.910335	NEUTRAL	MIMAT0023311 Oryza sativa miR2873c
osa-miR166l-5p	2.72297	1.66002	0.609636	-0.71398	0.914943	NEUTRAL	MIMAT0022871 Oryza sativa miR166l-5p
osa-miR396e-5p	26.5807	25.6302	0.964241	-0.0525342	0.916013	NEUTRAL	MIMAT0001601 Oryza sativa miR396e-5p
osa-miR11339-5p	5.09804	5.73872	1.12567	0.170787	0.918368	NEUTRAL	MIMAT0044632 Oryza sativa miR11339-5p
osa-miR1850.1	5.09804	5.79005	1.13574	0.183633	0.918454	NEUTRAL	MIMAT0007770 Oryza sativa miR1850.1
osa-miR5143b	5.01106	5.8927	1.17594	0.233814	0.918477	NEUTRAL	MIMAT0023289 Oryza sativa miR5143b
osa-miR444a-5p	7.35268	6.49737	0.883673	-0.178415	0.919495	NEUTRAL	MIMAT0020918 Oryza sativa miR444a-5p
osa-miR171e-5p	2.54902	1.71135	0.671376	-0.574807	0.921073	NEUTRAL	MIMAT0022879 Oryza sativa miR171e-5p
osa-miR5836	4.24836	3.57668	0.841896	-0.248285	0.928868	NEUTRAL	MIMAT0023312 Oryza sativa miR5836
osa-miR817	4.07441	3.52535	0.865243	-0.208822	0.934577	NEUTRAL	MIMAT0004062 Oryza sativa miR817
osa-miR6249b	3.31171	4.0787	1.2316	0.30053	0.938222	NEUTRAL	MIMAT0031378 Oryza sativa miR6249b
osa-miR3981-5p	3.98743	3.47403	0.871245	-0.19885	0.938343	NEUTRAL	MIMAT0019683 Oryza sativa miR3981-5p
osa-miR2878-5p	3.48567	4.0787	1.17013	0.226673	0.940453	NEUTRAL	MIMAT0013828 Oryza sativa miR2878-5p
osa-miR162a	8.70412	8.10606	0.931291	-0.102697	0.942099	NEUTRAL	MIMAT0000632 Oryza sativa miR162a
osa-miR5495	1.52539	2.21336	1.45102	0.537063	0.955166	NEUTRAL	MIMAT0022128 Oryza sativa miR5495
osa-miR156k	3.10432	2.36735	0.762597	-0.391007	0.958622	NEUTRAL	MIMAT0001020 Oryza sativa miR156k
osa-miR171c-5p	3.01734	2.31602	0.767569	-0.381632	0.963253	NEUTRAL	MIMAT0022877 Oryza sativa miR171c-5p
osa-miR6245b-5p	2.93037	2.36735	0.807867	-0.30781	0.964483	NEUTRAL	MIMAT0044648 Oryza sativa miR6245b-5p
osa-miR5490	1.8733	2.36735	1.26373	0.337688	0.965854	NEUTRAL	MIMAT0022123 Oryza sativa miR5490
osa-miR1861k	4.36878	5.18538	1.18692	0.247219	0.966909	NEUTRAL	MIMAT0007806 Oryza sativa miR1861k
osa-miR5083	7.82101	6.94805	0.888383	-0.170746	0.968558	NEUTRAL	MIMAT0020583 Oryza sativa miR5083
osa-miR1846e	7.73403	6.94805	0.898374	-0.154611	0.968558	NEUTRAL	MIMAT0010042 Oryza sativa miR1846e
osa-miR1873	7.56008	6.99938	0.925835	-0.111173	0.968558	NEUTRAL	MIMAT0007826 Oryza sativa miR1873
osa-miR2120b-5p	7.4731	6.94805	0.929742	-0.105097	0.968558	NEUTRAL	MIMAT0044644 Oryza sativa miR2120b-5p
osa-miR396a-3p	9.3464	9.76609	1.0449	0.06337	0.97343	NEUTRAL	MIMAT0022863 Oryza sativa miR396a-3p
osa-miR164d	13.8022	14.5521	1.05434	0.0763344	0.982857	NEUTRAL	MIMAT0001034 Oryza sativa miR164d
osa-miR2863b	2.84339	3.47403	1.22179	0.288998	0.987263	NEUTRAL	MIMAT0013818 Oryza sativa miR2863b
osa-miR5813	1.8733	1.15801	0.618165	-0.693936	0.990449	NEUTRAL	MIMAT0023285 Oryza sativa miR5813
osa-miR11336-5p	12.5377	12.7381	1.01598	0.0228778	0.992152	NEUTRAL	MIMAT0044626 Oryza sativa miR11336-5p
osa-miR396e-3p	1.61237	1.20934	0.750038	-0.414965	0.998035	NEUTRAL	MIMAT0015159 Oryza sativa miR396e-3p
osa-miR444d.2	6.41603	5.68739	0.886434	-0.173915	0.999373	NEUTRAL	MIMAT0005973 Oryza sativa miR444d.2

[truncated: 9 more sheets: Table S10, Table S11, Table S12, Table S13, Table S14, Table S15, Table S16, Table S17, Table S18]
